# Supplementary material for: Carnosinase-1 Knock-Out Reduces Kidney Fibrosis in Type-1 Diabetic Mice on High Fat Diet
Source: MDPI journal article supplement (doi:10.3390/antiox12061270), 2023-06-14
Supplement: s1 [file s1]

Suppl. Table 9: Metabolomic profile in kidney

## 9.1 Normal diet

| class          | Metabolite                              | WT           | Cndp1-KO     | p (vs WT) | WT STZ       | Cndp1-KO STZ | p (vs WT STZ) |
|----------------|-----------------------------------------|--------------|--------------|-----------|--------------|--------------|---------------|
| Amino acid     | Alanine                                 | 476±34       | 519.8±44.5   | 0.116     | 469±76.7     | 573±193.4    | 0.29          |
| Amino acid     | Arginine                                | 76.1±5.4     | 75.4±17.5    | 0.94      | 117.7±38.7   | 122.8±21.2   | 0.805         |
| Amino acid     | Asparagine                              | 57.2±8.0     | 519.8±44.5   | 0.78      | 60.2±13.8    | 73.0±16.1    | 0.206         |
| Amino acid     | Aspartic acid                           | 592.6±71.9   | 75.4±17.5    | 0.04*     | 417.9±139.2  | 458.5±227.7  | 0.741         |
| Amino acid     | Glutamine                               | 340.7±74.6   | 58.9±10.3    | 0.678     | 405.7±105.5  | 406.1±108.5  | 0.996         |
| Amino acid     | Glutamate                               | 2243.7±309.7 | 474.3±85.3   | 0.781     | 1818.2±89.9  | 1931.1±316.8 | 0.462         |
| Amino acid     | Glycine                                 | 1993.8±323.1 | 360.2±70.0   | 0.909     | 1291.3±109.5 | 1578.3±278.2 | 0.058         |
| Amino acid     | Histidine                               | 148.9±43.8   | 2186.9±317.2 | 0.086     | 171.4±53.1   | 167.9±44.8   | 0.914         |
| Amino acid     | Isoleucine                              | 63.7±16.2    | 1967.3±383.2 | 0.532     | 85.2±19.2    | 93.6±16.5    | 0.473         |
| Amino acid     | Leucine                                 | 131.2±19.1   | 108.3±18.5   | 0.332     | 191.4±49.9   | 193.3±36.0   | 0.949         |
| Amino acid     | Lysine                                  | 110.4±16.2   | 69.4±11.4    | 0.549     | 82.6±12.1    | 108.9±26.2   | 0.069         |
| Amino acid     | Methionine                              | 65.0±2.6     | 144.3±21.4   | 0.013*    | 49.9±12.9    | 63.0±16.8    | 0.199         |
| Amino acid     | Phenylalanine                           | 58.2±5.3     | 118.3±23.2   | 0.299     | 68.9±11.0    | 75.7±13.5    | 0.403         |
| Amino acid     | Proline                                 | 69.4±13.1    | 57.8±4.6     | 0.107     | 74.0±21.3    | 77.0±17.8    | 0.815         |
| Amino acid     | Serine                                  | 633.7±79.3   | 63.7±9.7     | 0.392     | 466.3±59.4   | 537.0±106.1  | 0.224         |
| Amino acid     | Tyrosine                                | 63.1±10.2    | 56.3±9.9     | 0.548     | 54.5±12.7    | 74.2±21.1    | 0.105         |
| Amino acid     | Valine                                  | 119.1±24.3   | 589.1±78.0   | 0.811     | 162.1±35.6   | 166.7±25.1   | 0.817         |
| Acylcarnitines | L-Carnitine                             | 452±136.8    | 322.3±97.3   | 0.229     | 323.8±51.4   | 312.5±44.9   | 0.785         |
| Acylcarnitines | L-Acetylcarnitine                       | 90±17        | 59.2±16.9    | 0.067     | 64.2±16.7    | 67.5±7.9     | 0.772         |
| Acylcarnitines | Propionylcarnitine                      | 3.5±0.7      | 2.9±0.9      | 0.413     | 5.6±1.7      | 4±1          | 0.189         |
| Acylcarnitines | Malonylcarnitine                        | 0.6±0.2      | 0.6±0.2      | 0.925     | 1.1±0.4      | 0.9±0.4      | 0.519         |
| Acylcarnitines | Butyrylcarnitine                        | 4.6±1.3      | 3.7±1.6      | 0.465     | 6.3±2.6      | 6.5±0.8      | 0.889         |
| Acylcarnitines | Butenylcarnitine                        | 0.1±0.1      | 0.1±0.1      | 0.109     | 0.2±0.1      | 0.2±0.1      | 0.6           |
| Acylcarnitines | 2-Methylbutyrylcarnitine                | 0.6±0.2      | 0.5±0.3      | 0.768     | 1.2±0.7      | 1.1±0.4      | 0.889         |
| Acylcarnitines | Glutaryl carnitine                      | 0.7±0.1      | 0.6±0.2      | 0.506     | 0.8±0.1      | 0.7±0.1      | 0.519         |
| Acylcarnitines | 3-Methylglutaryl carnitine              | 0.2±0.1      | 0.2±0.1      | 0.771     | 0.2±0.1      | 0.2±0.1      | 0.909         |
| Acylcarnitines | Methylmalonylcarnitine                  | 2.1±0.3      | 2.1±0.7      | 0.972     | 2.5±0.8      | 2.3±0.7      | 0.841         |
| Acylcarnitines | Glutaconylcarnitine                     | 0.1±0.1      | 0.1±0.1      | 0.484     | 0.1±0.1      | 0.1±0.1      | 0.856         |
| Acylcarnitines | Hexanoylcarnitine                       | 1±0.2        | 0.8±0.2      | 0.309     | 1.1±0.3      | 1.2±0.3      | 0.76          |
| Acylcarnitines | L-Octanoylcarnitine                     | 0.2±0.2      | 0.2±0.2      | 0.936     | 0.2±0.2      | 0.3±0.2      | 0.491         |
| Acylcarnitines | Nonanoylcarnitine                       | 0.1±0.1      | 0.1±0.1      | 0.838     | 0.2±0.1      | 0.2±0.1      | 0.876         |
| Acylcarnitines | Dodecanoylcarnitine                     | 0.6±0.2      | 0.6±0.2      | 0.999     | 0.6±0.1      | 0.6±0.2      | 0.766         |
| Acylcarnitines | Tetradecanoylcarnitine                  | 2±0.7        | 1.7±0.5      | 0.581     | 1.8±0.4      | 2±0.4        | 0.4           |
| Acylcarnitines | cis-5-Tetradecenoylcarnitine            | 0.4±0.1      | 0.3±0.2      | 0.809     | 0.4±0.1      | 0.4±0.1      | 0.969         |
| Acylcarnitines | 3-Hydroxy-cis-5-tetradecenoylcarnitine  | 0.2±0.1      | 0.1±0.1      | 0.355     | 0.2±0.1      | 0.2±0.1      | 0.67          |
| Acylcarnitines | O-(hydroxytetradecadienoyl)-L-carnitine | 0.1±0.1      | 0.1±0.1      | 0.414     | 0.1±0.1      | 0.1±0.1      | 0.905         |

|                           |                                     |              |              |                     |              |              |                     |
|---------------------------|-------------------------------------|--------------|--------------|---------------------|--------------|--------------|---------------------|
| <b>Acylcarnitines</b>     | L-Palmitoylcarnitine                | 9.9±1.9      | 8.6±2.3      | 0.459               | 8.6±1.5      | 10.8±1.4     | 0.106               |
| <b>Acylcarnitines</b>     | 3-Hydroxyhexadecanoylcarnitine      | 0.3±0.1      | 0.3±0.1      | 0.306               | 0.3±0.1      | 0.3±0.1      | 0.912               |
| <b>Acylcarnitines</b>     | 9-Hexadecenoylcarnitine             | 0.8±0.2      | 0.8±0.3      | 0.804               | 0.9±0.3      | 1.1±0.3      | 0.335               |
| <b>Acylcarnitines</b>     | 3-Hydroxy-9-hexadecenoylcarnitine   | 0.2±0.1      | 0.1±0.1      | 0.054               | 0.2±0.1      | 0.2±0.1      | 0.926               |
| <b>Acylcarnitines</b>     | 9.12-Hexadecadienoylcarnitine       | 0.3±0.1      | 0.3±0.1      | 0.294               | 0.4±0.1      | 0.4±0.1      | 0.732               |
| <b>Acylcarnitines</b>     | Stearoylcarnitine                   | 4.5±0.7      | 4±0.9        | 0.488               | 4.2±0.4      | 5.4±0.9      | 0.082               |
| <b>Acylcarnitines</b>     | Oleoylcarnitine                     | 3.9±0.7      | 3.6±1.1      | 0.724               | 4.4±0.6      | 5.4±1.4      | 0.278               |
| <b>Acylcarnitines</b>     | 3-Hydroxy-11Z-octadecenoylcarnitine | 0.3±0.1      | 0.3±0.2      | 0.659               | 0.4±0.1      | 0.4±0.1      | 0.838               |
| <b>Acylcarnitines</b>     | Linoleyl carnitine                  | 1.7±0.4      | 1.3±0.5      | 0.259               | 2.2±0.6      | 2.4±0.7      | 0.697               |
| <b>Amino acid related</b> | 1-Methylhistidine                   | 27.1±3.6     | 22.9±5.3     | 0.303               | 39.3±5.5     | 38.5±11.1    | 0.92                |
| <b>Amino acid related</b> | 3-Methylhistidine                   | 5.3±0.5      | 1.6±0.4      | 0.001*              | 3.9±1        | 2.1±0.6      | 0.03*               |
| <b>Amino acid related</b> | 5-Aminopentanoic acid               | 2.5±0.8      | 1.6±0.3      | 0.105               | 3.3±2.3      | 4.4±1.6      | 0.546               |
| <b>Amino acid related</b> | L-alpha-Aminobutyric acid           | 24.2±6.2     | 40.1±8.2     | 0.036* <sup>§</sup> | 33.3±20.7    | 34±11.2      | 0.96                |
| <b>Amino acid related</b> | Asymmetric dimethylarginine         | 5±1          | 5.1±0.8      | 0.835               | 5±0.9        | 5.2±2.2      | 0.922               |
| <b>Amino acid related</b> | Aminoadipic acid                    | 38±14        | 23.7±7.2     | 0.165               | 24.4±10.4    | 55.1±41.6    | 0.261               |
| <b>Amino acid related</b> | 3-Aminobutanoic acid                | 2.4±0.9      | 2.9±1.1      | 0.462               | 3.2±1.1      | 4.1±1.9      | 0.48                |
| <b>Amino acid related</b> | Betaine                             | 1618.3±423.5 | 1512.5±771.1 | 0.842               | 1688.8±638.2 | 2894±965     | 0.122               |
| <b>Amino acid related</b> | Citrulline                          | 16.7±4.3     | 20.4±4.1     | 0.311               | 24.9±7.9     | 35±10.5      | 0.231               |
| <b>Amino acid related</b> | Creatinine                          | 25.4±4.7     | 33.8±14.3    | 0.37                | 24.6±5.8     | 37.8±10.7    | 0.109               |
| <b>Amino acid related</b> | Cystine                             | 708±519.8    | 553±152.3    | 0.638               | 812.8±408    | 1185.8±420.3 | 0.313               |
| <b>Amino acid related</b> | Homo-L-arginine                     | 0.7±0.8      | 0.4±0.2      | 0.593               | 0.4±0.3      | 0.4±0.2      | 0.863               |
| <b>Amino acid related</b> | Homocysteine                        | 52.5±18.5    | 62.1±11.4    | 0.474               | 46.8±11      | 41.4±21.7    | 0.718               |
| <b>Amino acid related</b> | Ornithine                           | 12.5±3.4     | 20.7±9       | 0.186               | 21.6±3.8     | 27.5±3.4     | 0.091               |
| <b>Amino acid related</b> | Phenylacetyl glycine                | 10.6±1.7     | 29.6±15.5    | 0.079               | 41.4±23.9    | 92.5±58.8    | 0.212               |
| <b>Amino acid related</b> | L-phenylalanine betaine             | 0.1±0.1      | 0.1±0.1      | 0.84                | 0.1±0.1      | 0.2±0.1      | 0.369               |
| <b>Amino acid related</b> | Proline betaine                     | 16.3±2.5     | 11.4±3.3     | 0.08                | 6.7±3.1      | 18.1±4.4     | 0.011* <sup>§</sup> |
| <b>Amino acid related</b> | Sarcosine                           | 3.8±1.2      | 2.1±0.7      | 0.075               | 1.8±0.2      | 2.9±1.1      | 0.106               |
| <b>Amino acid related</b> | Symmetric dimethylarginine          | 0.8±0.2      | 0.9±0.3      | 0.748               | 0.8±0.2      | 1.1±0.5      | 0.292               |
| <b>Amino acid related</b> | 4-Hydroxyproline                    | 26.1±4       | 23.5±2.5     | 0.365               | 18.4±3       | 20.4±4.1     | 0.523               |
| <b>Amino acid related</b> | Taurine                             | 3207.8±321.8 | 3122.5±400.4 | 0.784               | 3382.8±254   | 3472.5±257.6 | 0.683               |
| <b>Bile acids</b>         | Cholic acid                         | 2.5±1.1      | 2.1±1.6      | 0.683               | 6.7±4.4      | 3.6±2        | 0.297               |
| <b>Bile acids</b>         | Deoxycholic acid                    | 0.6±0.3      | 0.3±0.2      | 0.144               | 0.9±0.4      | 1±0.4        | 0.819               |
| <b>Bile acids</b>         | Taurocholic acid                    | 4.8±1.9      | 29.2±32.9    | 0.246               | 11.1±8.3     | 10.5±10.8    | 0.942               |
| <b>Bile acids</b>         | Taurochenodesoxycholic acid         | 0.2±0.1      | 0.7±0.6      | 0.166               | 0.9±0.9      | 0.3±0.3      | 0.298               |
| <b>Bile acids</b>         | Taurodeoxycholic acid               | 0.3±0.1      | 2.2±2.4      | 0.22                | 0.6±0.6      | 0.5±0.4      | 0.836               |
| <b>Bile acids</b>         | Tauro-b-muricholic acid             | 1.7±0.7      | 7±6.3        | 0.192               | 5.5±4.6      | 4.2±5.9      | 0.777               |
| <b>biogenic amines</b>    | beta-Alanine                        | 39.4±7.5     | 33.7±9.1     | 0.434               | 64.4±15.6    | 81.5±24.7    | 0.35                |
| <b>biogenic amines</b>    | gamma-Aminobutyric acid             | 72.9±11.7    | 68.4±8       | 0.597               | 82.8±11.8    | 88.5±32.1    | 0.782               |
| <b>biogenic amines</b>    | Histamine                           | 3.6±1.3      | 3.4±1.9      | 0.877               | 0.6±0.2      | 1.3±0.9      | 0.219               |

|                           |                        |               |               |        |                |                |       |
|---------------------------|------------------------|---------------|---------------|--------|----------------|----------------|-------|
| <b>biogenic amines</b>    | Putrescine             | 6.3±1.9       | 6.2±1.6       | 0.977  | 7.6±2.1        | 10.9±3.5       | 0.205 |
| <b>biogenic amines</b>    | Serotonin              | 2.4±1.3       | 2.4±1.2       | 0.985  | 1.7±0.7        | 2.6±1.7        | 0.379 |
| <b>biogenic amines</b>    | Spermidine             | 9.2±2.5       | 9.3±2.2       | 0.991  | 16.5±7.5       | 18.9±9.9       | 0.753 |
| <b>biogenic amines</b>    | Spermine               | 5.5±1.2       | 7.1±2.6       | 0.353  | 9.3±4.6        | 8.8±4.1        | 0.882 |
| <b>Carboxylic acids</b>   | cis-Aconitic acid      | 1.1±0.6       | 0.8±0.3       | 0.381  | 1.2±0.5        | 3.2±2.6        | 0.236 |
| <b>Carboxylic acids</b>   | Dodecanedioic acid     | 1.1±0.3       | 1.1±0.2       | 0.999  | 1.3±0.3        | 1.3±0.2        | 0.852 |
| <b>Carboxylic acids</b>   | Hippuric acid          | 7.6±6.4       | 3±1.4         | 0.264  | 8.5±4.8        | 18.6±12.2      | 0.231 |
| <b>Carboxylic acids</b>   | L-Lactic acid          | 7244.3±1189.4 | 7813.8±2648.2 | 0.746  | 16340.8±3331.1 | 18165.8±3955.6 | 0.564 |
| <b>Carboxylic acids</b>   | 3-Hydroxyglutaric acid | 20.1±1.3      | 17.1±4.3      | 0.284  | 19.3±5.6       | 16.5±1.5       | 0.42  |
| <b>Carboxylic acids</b>   | Succinic acid          | 81.7±13.9     | 112.3±48.9    | 0.336  | 190.1±70       | 207.5±61.5     | 0.757 |
| <b>Ceramides</b>          | Cer(d16:1/22:0)        | 0.1±0.1       | 0.1±0.1       | 0.894  | 0.1±0.1        | 0.1±0.1        | 0.376 |
| <b>Ceramides</b>          | Cer(d16:1/24:0)        | 0.2±0.1       | 0.2±0.1       | 0.238  | 0.1±0.1        | 0.1±0.1        | 0.89  |
| <b>Ceramides</b>          | Cer(d18:1/14:0)        | 0.2±0.1       | 0.2±0.1       | 0.744  | 0.1±0.1        | 0.1±0.1        | 0.413 |
| <b>Ceramides</b>          | Cer(d18:1/16:0)        | 4.7±0.4       | 5±0.7         | 0.493  | 5.2±0.7        | 5.7±0.9        | 0.504 |
| <b>Ceramides</b>          | Cer(d18:1/18:0(OH))    | 0.4±0.2       | 0.4±0.1       | 0.841  | 0.6±0.2        | 0.6±0.1        | 0.651 |
| <b>Ceramides</b>          | Cer(d18:1/18:0)        | 0.9±0.1       | 0.9±0.1       | 0.622  | 1.1±0.2        | 1.1±0.1        | 0.952 |
| <b>Ceramides</b>          | Cer(d18:1/18:1)        | 0.2±0.1       | 0.1±0.1       | 0.095  | 0.2±0.1        | 0.2±0.1        | 0.549 |
| <b>Ceramides</b>          | Cer(d18:1/20:0(OH))    | 26.4±3.4      | 24.4±2.5      | 0.426  | 36±6           | 38±6.1         | 0.698 |
| <b>Ceramides</b>          | Cer(d18:1/20:0)        | 1±0.1         | 1±0.2         | 0.946  | 1.3±0.3        | 1.5±0.1        | 0.349 |
| <b>Ceramides</b>          | Cer(d18:1/22:0)        | 7.6±0.2       | 7.9±0.9       | 0.684  | 8.9±1.6        | 9.6±0.5        | 0.474 |
| <b>Ceramides</b>          | Cer(d18:1/23:0)        | 3.2±0.2       | 2.9±0.6       | 0.383  | 3.7±0.9        | 3.8±0.8        | 0.937 |
| <b>Ceramides</b>          | Cer(d18:1/24:0)        | 18.5±1.2      | 18±2.1        | 0.688  | 16.8±1.1       | 18±2.1         | 0.39  |
| <b>Ceramides</b>          | Cer(d18:1/24:1)        | 9.5±0.4       | 9.1±0.4       | 0.193  | 9.9±1.1        | 10.2±1.3       | 0.782 |
| <b>Ceramides</b>          | Cer(d18:1/25:0)        | 1.3±0.1       | 0.9±0.2       | 0.002* | 1.5±0.1        | 1.5±0.2        | 0.845 |
| <b>Ceramides</b>          | Cer(d18:1/26:0)        | 0.3±0.1       | 0.2±0.1       | 0.101  | 0.2±0.1        | 0.2±0.2        | 0.23  |
| <b>Ceramides</b>          | Cer(d18:1/26:1)        | 0.2±0.1       | 0.2±0.1       | 0.553  | 0.2±0.1        | 0.3±0.1        | 0.111 |
| <b>Ceramides</b>          | Cer(d18:2/14:0)        | 0.1±0.1       | 0.1±0         | 0.356  | 0.1±0.1        | 0.1±0          | 0.356 |
| <b>Ceramides</b>          | Cer(d18:2/16:0)        | 3.1±0.4       | 3.4±0.6       | 0.509  | 3.3±0.5        | 4.2±0.6        | 0.088 |
| <b>Ceramides</b>          | Cer(d18:2/18:0)        | 0.3±0.1       | 0.4±0.1       | 0.36   | 0.3±0.1        | 0.3±0.1        | 0.922 |
| <b>Ceramides</b>          | Cer(d18:2/20:0)        | 0.3±0.1       | 0.4±0.1       | 0.477  | 0.4±0.1        | 0.4±0.1        | 0.878 |
| <b>Ceramides</b>          | Cer(d18:2/22:0)        | 6.1±1         | 7±0.7         | 0.208  | 7±1            | 7.9±0.9        | 0.283 |
| <b>Ceramides</b>          | Cer(d18:2/23:0)        | 0.9±0.2       | 0.9±0.3       | 0.966  | 1±0.2          | 1.1±0.3        | 0.655 |
| <b>Ceramides</b>          | Cer(d18:2/24:0)        | 22.2±3.3      | 21.4±1.4      | 0.704  | 20.9±1.8       | 22.8±2.8       | 0.362 |
| <b>Ceramides</b>          | Cer(d18:2/24:1)        | 5.4±0.9       | 5.8±0.5       | 0.418  | 6.5±0.9        | 6.6±0.5        | 0.857 |
| <b>Cholesteryl esters</b> | CE(14:0)               | 0.3±0.2       | 0.3±0.4       | 0.718  | 0.7±0.5        | 0.7±0.7        | 0.912 |
| <b>Cholesteryl esters</b> | CE(15:1)               | 2±0.7         | 1.6±1.6       | 0.684  | 2.3±1.7        | 3.5±1.5        | 0.392 |
| <b>Cholesteryl esters</b> | CE(16:1)               | 1.1±0.3       | 1.5±1         | 0.539  | 1.1±0.3        | 1.4±0.7        | 0.444 |
| <b>Cholesteryl esters</b> | CE(18:1)               | 2.8±0.9       | 3.5±1.9       | 0.597  | 3.1±0.8        | 5±1.3          | 0.075 |
| <b>Cholesteryl esters</b> | CE(18:2)               | 9.9±4.6       | 16.8±11.9     | 0.38   | 15.6±2.2       | 23.5±11.8      | 0.293 |

|                                 |                             |             |            |       |            |            |                     |
|---------------------------------|-----------------------------|-------------|------------|-------|------------|------------|---------------------|
| <b>Cholesteryl esters</b>       | CE(18:3)                    | 0.9±0.6     | 0.9±0.6    | 0.888 | 0.6±0.3    | 1±0.6      | 0.289               |
| <b>Cholesteryl esters</b>       | CE(20:3)                    | 0.5±0.4     | 0.9±0.5    | 0.267 | 1.1±0.5    | 1.6±0.9    | 0.367               |
| <b>Cholesteryl esters</b>       | CE(20:4)                    | 19.2±4.8    | 31.1±19.4  | 0.342 | 20.9±2.6   | 29.3±10.8  | 0.236               |
| <b>Cholesteryl esters</b>       | CE(20:5)                    | 0.6±0.3     | 0.8±0.5    | 0.482 | 0.7±0.3    | 1.3±0.6    | 0.15                |
| <b>Cholesteryl esters</b>       | CE(22:5)                    | 0.5±0.2     | 0.6±0.3    | 0.45  | 0.6±0.1    | 0.8±0.2    | 0.083               |
| <b>Cholesteryl esters</b>       | CE(22:6)                    | 5.4±1.5     | 6.8±3.6    | 0.551 | 3.7±0.3    | 4.6±1.9    | 0.423               |
| <b>Diacylglycerols</b>          | DG(14:0_18:1)               | 0.9±0.4     | 1.2±0.5    | 0.353 | 0.8±0.3    | 1.2±0.2    | 0.06                |
| <b>Diacylglycerols</b>          | DG(14:0_18:2)               | 0.8±0.3     | 1.1±0.5    | 0.379 | 0.9±0.1    | 1.4±0.4    | 0.065               |
| <b>Diacylglycerols</b>          | DG(14:1_18:1)               | 0.2±0.2     | 0.3±0.1    | 0.215 | 0.3±0.2    | 0.3±0.1    | 0.717               |
| <b>Diacylglycerols</b>          | DG(16:0_16:1)               | 2.8±1.2     | 4.8±2.1    | 0.191 | 3.8±1.5    | 6.3±0.7    | 0.033* <sup>§</sup> |
| <b>Diacylglycerols</b>          | DG(16:0_18:1)               | 21.5±5      | 27.7±8.4   | 0.313 | 26.3±7.4   | 39.5±3.6   | 0.032* <sup>§</sup> |
| <b>Diacylglycerols</b>          | DG(16:0_18:2)               | 16.2±4.7    | 19.6±6.7   | 0.493 | 23.3±4.6   | 32±5.1     | 0.068               |
| <b>Diacylglycerols</b>          | DG(16:0_20:3)               | 0.4±0.2     | 0.5±0.1    | 0.272 | 0.4±0.1    | 0.6±0.3    | 0.196               |
| <b>Diacylglycerols</b>          | DG(16:0_20:4)               | 1.3±0.3     | 1.6±0.4    | 0.372 | 1.5±0.4    | 1.9±0.5    | 0.267               |
| <b>Diacylglycerols</b>          | DG(16:1_18:0)               | 0.3±0.2     | 0.2±0.2    | 0.822 | 0.4±0.2    | 0.5±0.2    | 0.362               |
| <b>Diacylglycerols</b>          | DG(16:1_18:2)               | 1.8±0.8     | 2.7±1.3    | 0.316 | 2.6±0.5    | 4.8±0.5    | 0.002* <sup>§</sup> |
| <b>Diacylglycerols</b>          | DG(17:0_18:1)               | 6.2±1.1     | 4.7±0.5    | 0.059 | 6.8±1.4    | 6.8±1.9    | 0.967               |
| <b>Diacylglycerols</b>          | DG(18:0_20:4)               | 5.7±0.3     | 5.5±1.3    | 0.795 | 5.9±0.6    | 6.5±1.6    | 0.514               |
| <b>Diacylglycerols</b>          | DG(18:1_18:1)               | 6.7±2.7     | 9.3±3.6    | 0.34  | 8±1.1      | 12.9±1.4   | 0.003* <sup>§</sup> |
| <b>Diacylglycerols</b>          | DG(18:1_18:2)               | 17.2±5.9    | 23±9.6     | 0.404 | 29.7±4.3   | 44.6±12.4  | 0.096               |
| <b>Diacylglycerols</b>          | DG(18:1_18:3)               | 1.6±0.5     | 1.5±1.3    | 0.854 | 2.2±0.8    | 1.8±0.7    | 0.563               |
| <b>Diacylglycerols</b>          | DG(18:1_20:0)               | 0.8±0.4     | 0.7±0.4    | 0.729 | 0.4±0.3    | 1.1±0.4    | 0.03* <sup>§</sup>  |
| <b>Diacylglycerols</b>          | DG(18:1_20:1)               | 0.2±0.1     | 0.3±0.1    | 0.23  | 0.3±0.1    | 0.5±0.1    | 0.069               |
| <b>Diacylglycerols</b>          | DG(18:1_20:2)               | 0.3±0.1     | 0.2±0.1    | 0.556 | 0.3±0.1    | 0.5±0.2    | 0.265               |
| <b>Diacylglycerols</b>          | DG(18:1_20:4)               | 1.8±0.3     | 1.9±0.3    | 0.679 | 1.9±0.4    | 2.5±0.9    | 0.31                |
| <b>Diacylglycerols</b>          | DG(18:2_18:2)               | 12.2±2.5    | 14.8±7     | 0.565 | 26.4±4.3   | 35.7±13.1  | 0.285               |
| <b>Diacylglycerols</b>          | DG(18:2_20:4)               | 0.7±0.1     | 0.9±0.3    | 0.309 | 1.1±0.1    | 1.5±0.6    | 0.378               |
| <b>Dihydroceramides</b>         | Cer(d18:0/18:0(OH))         | 5.1±2.1     | 4.5±4      | 0.806 | 4.6±2.4    | 6.1±3.4    | 0.543               |
| <b>Dihydroceramides</b>         | Cer(d18:0/22:0)             | 0.5±0.1     | 0.5±0.1    | 0.795 | 0.5±0.2    | 0.6±0.3    | 0.54                |
| <b>Dihydroceramides</b>         | Cer(d18:0/24:0)             | 0.8±0.2     | 0.7±0.1    | 0.318 | 0.6±0.1    | 0.7±0.3    | 0.264               |
| <b>Dihydroceramides</b>         | Cer(d18:0/24:1)             | 0.5±0.1     | 0.5±0.2    | 0.484 | 0.5±0.1    | 0.6±0.2    | 0.532               |
| <b>Fatty acids</b>              | Arachidonic acid            | 483.3±289.5 | 318±68.2   | 0.374 | 292.5±56   | 268.8±77.2 | 0.681               |
| <b>Fatty acids</b>              | Docosahexaenoic acid        | 242.3±114.9 | 155±43     | 0.264 | 107.2±24.9 | 94.7±35.7  | 0.637               |
| <b>Fatty acids</b>              | Eicosapentaenoic acid       | 4.5±3.1     | 5±0.9      | 0.796 | 3.4±0.5    | 3.5±0.9    | 0.85                |
| <b>Fatty acids</b>              | Elaidic acid                | 73.1±16.6   | 101.1±15.9 | 0.079 | 121.3±24.3 | 112.6±17.5 | 0.63                |
| <b>Fatty acids</b>              | Linoleic acid               | 241±83.9    | 223.5±17.9 | 0.736 | 304.3±96   | 289.3±92.9 | 0.853               |
| <b>Fatty acids</b>              | Eicosadienoic acid          | 2.8±1       | 3±0.4      | 0.732 | 5±1.1      | 4.2±1      | 0.368               |
| <b>Fatty acids</b>              | Dihomo-gamma-linolenic acid | 10.5±3.6    | 11.8±1.4   | 0.561 | 10.5±3.7   | 13.5±3.9   | 0.367               |
| <b>Lysophosphatidylcholines</b> | lysoPC a C14:0              | 1.1±0.2     | 1.1±0.2    | 0.781 | 1.1±0.2    | 1.3±0.3    | 0.143               |

|                                 |                |              |              |        |              |              |       |
|---------------------------------|----------------|--------------|--------------|--------|--------------|--------------|-------|
| <b>Lysophosphatidylcholines</b> | lysoPC a C16:0 | 203.5±8.1    | 184.8±35.1   | 0.402  | 181.8±13.3   | 199±26.5     | 0.352 |
| <b>Lysophosphatidylcholines</b> | lysoPC a C16:1 | 2.8±0.6      | 3.1±0.7      | 0.55   | 3.1±0.8      | 4.1±1.1      | 0.198 |
| <b>Lysophosphatidylcholines</b> | lysoPC a C17:0 | 3.4±0.4      | 2.6±0.6      | 0.066  | 4±0.4        | 3.9±1        | 0.991 |
| <b>Lysophosphatidylcholines</b> | lysoPC a C18:0 | 104.5±4.1    | 96.8±24.5    | 0.607  | 92.7±12.1    | 91.9±14.8    | 0.947 |
| <b>Lysophosphatidylcholines</b> | lysoPC a C18:1 | 39.8±3.8     | 38.6±10.9    | 0.869  | 50.8±10.4    | 58.3±15.6    | 0.514 |
| <b>Lysophosphatidylcholines</b> | lysoPC a C18:2 | 43.1±6.3     | 32.4±12      | 0.216  | 69.3±16.1    | 71.7±30.1    | 0.908 |
| <b>Lysophosphatidylcholines</b> | lysoPC a C20:3 | 4.4±1.6      | 4.7±1.8      | 0.844  | 8.2±3.1      | 9.1±4.5      | 0.792 |
| <b>Lysophosphatidylcholines</b> | lysoPC a C20:4 | 64.9±15.9    | 66.6±23      | 0.922  | 83.2±19      | 81.4±39.1    | 0.945 |
| <b>Lysophosphatidylcholines</b> | lysoPC a C24:0 | 1.8±0.2      | 2±0.3        | 0.551  | 2±0.2        | 2.2±0.4      | 0.347 |
| <b>Lysophosphatidylcholines</b> | lysoPC a C26:0 | 1.5±0.4      | 1.7±0.5      | 0.541  | 1.3±0.4      | 1.6±0.4      | 0.248 |
| <b>Lysophosphatidylcholines</b> | lysoPC a C26:1 | 0.8±0.1      | 0.8±0.2      | 0.958  | 0.8±0.2      | 0.7±0.2      | 0.251 |
| <b>Lysophosphatidylcholines</b> | lysoPC a C28:0 | 1.3±0.3      | 2±0.8        | 0.162  | 1.5±0.8      | 1.9±1.1      | 0.57  |
| <b>Lysophosphatidylcholines</b> | lysoPC a C28:1 | 1.5±0.7      | 1.8±0.8      | 0.595  | 1.5±0.3      | 2.4±1.4      | 0.336 |
| <b>Phosphatidylcholines</b>     | PC aa C24:0    | 0.4±0.1      | 0.5±0.1      | 0.06   | 0.6±0.1      | 0.5±0.1      | 0.204 |
| <b>Phosphatidylcholines</b>     | PC aa C26:0    | 2.1±0.2      | 2.4±0.4      | 0.214  | 2.4±0.5      | 2.5±0.2      | 0.801 |
| <b>Phosphatidylcholines</b>     | PC aa C28:1    | 2.2±0.1      | 2.4±0.2      | 0.089  | 2±0.3        | 2.4±0.6      | 0.266 |
| <b>Phosphatidylcholines</b>     | PC aa C30:0    | 39.3±5.4     | 44±6.4       | 0.365  | 37.4±3.2     | 43.5±5.2     | 0.132 |
| <b>Phosphatidylcholines</b>     | PC aa C30:2    | 0.2±0.1      | 0.3±0.3      | 0.505  | 0.1±0.1      | 0.1±0.2      | 0.266 |
| <b>Phosphatidylcholines</b>     | PC aa C32:0    | 2297.3±202.5 | 2381.3±399.2 | 0.757  | 2034.5±126   | 2043.3±380.1 | 0.972 |
| <b>Phosphatidylcholines</b>     | PC aa C32:1    | 167.5±19.7   | 214±31.9     | 0.075  | 178.5±13.8   | 214.3±27.6   | 0.092 |
| <b>Phosphatidylcholines</b>     | PC aa C32:2    | 12.4±2       | 13.7±2.4     | 0.493  | 15±1.9       | 17.2±1.6     | 0.178 |
| <b>Phosphatidylcholines</b>     | PC aa C32:3    | 2.1±0.3      | 2.5±0.6      | 0.302  | 2.8±0.3      | 2.9±0.5      | 0.793 |
| <b>Phosphatidylcholines</b>     | PC aa C34:1    | 1618.5±85.6  | 1634±250.1   | 0.923  | 1715.3±103.6 | 1948±153.6   | 0.073 |
| <b>Phosphatidylcholines</b>     | PC aa C34:2    | 1362±102.1   | 1175±176.3   | 0.163  | 1886.3±251.7 | 2034±101.5   | 0.382 |
| <b>Phosphatidylcholines</b>     | PC aa C34:3    | 58±7.4       | 56.1±8.8     | 0.781  | 78.4±8.4     | 83.6±7.1     | 0.442 |
| <b>Phosphatidylcholines</b>     | PC aa C34:4    | 7.6±0.9      | 7.5±1.4      | 0.946  | 10.4±1.6     | 10.9±0.9     | 0.615 |
| <b>Phosphatidylcholines</b>     | PC aa C36:0    | 52.8±5       | 43.1±4       | 0.038* | 46.9±8.4     | 43.5±4.8     | 0.558 |
| <b>Phosphatidylcholines</b>     | PC aa C36:1    | 480.3±12.3   | 442.8±77.9   | 0.442  | 478.5±48.2   | 523.3±65.1   | 0.375 |
| <b>Phosphatidylcholines</b>     | PC aa C36:2    | 909.8±29.6   | 743.3±130.2  | 0.074  | 1059.3±116.6 | 1117.5±85.2  | 0.511 |
| <b>Phosphatidylcholines</b>     | PC aa C36:3    | 475.5±31.8   | 421.5±41.8   | 0.125  | 664.5±76.4   | 721.5±75.7   | 0.394 |
| <b>Phosphatidylcholines</b>     | PC aa C36:4    | 2349.8±170.6 | 2315±456     | 0.906  | 2349.8±99.3  | 2353.8±237.3 | 0.98  |
| <b>Phosphatidylcholines</b>     | PC aa C36:5    | 47±1.9       | 52.1±10.5    | 0.442  | 51.8±3.1     | 58±8.7       | 0.288 |
| <b>Phosphatidylcholines</b>     | PC aa C36:6    | 24±2.1       | 20.3±5       | 0.271  | 22.2±3.4     | 22.3±5.4     | 0.99  |
| <b>Phosphatidylcholines</b>     | PC aa C38:0    | 409.3±27.3   | 292.8±21.7   | 0.002* | 284.8±100.8  | 259.3±102.8  | 0.77  |
| <b>Phosphatidylcholines</b>     | PC aa C38:1    | 125.8±4.8    | 89±13        | 0.004* | 109.4±33.1   | 91.5±29.7    | 0.513 |
| <b>Phosphatidylcholines</b>     | PC aa C38:3    | 158.5±12.1   | 141.3±13.9   | 0.155  | 182.3±26     | 194.3±29.6   | 0.616 |
| <b>Phosphatidylcholines</b>     | PC aa C38:4    | 1416±54.1    | 1312.8±223.4 | 0.467  | 1423.5±168.6 | 1416±199.2   | 0.962 |
| <b>Phosphatidylcholines</b>     | PC aa C38:5    | 627.3±28.5   | 610.5±67.6   | 0.706  | 681.8±64.5   | 741±95.1     | 0.407 |
| <b>Phosphatidylcholines</b>     | PC aa C38:6    | 2271.8±156.9 | 2152.8±487.8 | 0.702  | 1629.8±72.9  | 1664±467.6   | 0.905 |

|                      |             |            |           |        |            |            |       |
|----------------------|-------------|------------|-----------|--------|------------|------------|-------|
| Phosphatidylcholines | PC aa C40:1 | 3.8±0.5    | 3±0.1     | 0.029* | 4.4±1.2    | 4.1±0.6    | 0.775 |
| Phosphatidylcholines | PC aa C40:2 | 5.6±1.3    | 4.4±0.3   | 0.138  | 6±1.3      | 5.9±0.8    | 0.884 |
| Phosphatidylcholines | PC aa C40:3 | 5.8±1.1    | 4.7±0.2   | 0.109  | 6.8±1.1    | 6.8±0.6    | 0.979 |
| Phosphatidylcholines | PC aa C40:4 | 22.7±1.4   | 23.1±4.1  | 0.885  | 27.6±2.8   | 30.2±3.4   | 0.333 |
| Phosphatidylcholines | PC aa C40:5 | 55.4±2.2   | 57.7±6    | 0.545  | 65.2±6.6   | 76.9±7.1   | 0.081 |
| Phosphatidylcholines | PC aa C40:6 | 400.3±18.8 | 331±56.8  | 0.092  | 292.8±27.9 | 296±70.3   | 0.944 |
| Phosphatidylcholines | PC aa C42:0 | 1.3±0.3    | 1±0.2     | 0.065  | 1±0.2      | 1±0.2      | 0.754 |
| Phosphatidylcholines | PC aa C42:1 | 1.9±0.5    | 1.4±0.3   | 0.111  | 1.4±0.2    | 1.4±0.4    | 0.801 |
| Phosphatidylcholines | PC aa C42:2 | 2.2±0.7    | 1.5±0.2   | 0.107  | 2±0.3      | 1.9±0.4    | 0.756 |
| Phosphatidylcholines | PC aa C42:4 | 7.6±1.1    | 5.5±1.3   | 0.066  | 3.7±0.7    | 3.9±0.9    | 0.797 |
| Phosphatidylcholines | PC aa C42:5 | 9±0.5      | 7.8±0.4   | 0.013* | 7.5±1      | 7.3±1.2    | 0.798 |
| Phosphatidylcholines | PC aa C42:6 | 5.4±1.3    | 4.1±0.5   | 0.123  | 5.4±0.5    | 5.6±0.6    | 0.617 |
| Phosphatidylcholines | PC ae C30:0 | 4.6±0.6    | 4.7±0.6   | 0.881  | 4.3±1      | 5±0.8      | 0.361 |
| Phosphatidylcholines | PC ae C30:1 | 0.4±0.2    | 0.5±0.2   | 0.282  | 0.4±0.1    | 0.5±0.2    | 0.463 |
| Phosphatidylcholines | PC ae C30:2 | 0.6±0.2    | 0.5±0.1   | 0.459  | 0.6±0.1    | 0.7±0.2    | 0.516 |
| Phosphatidylcholines | PC ae C32:1 | 31.5±2.9   | 32.1±4.1  | 0.829  | 27.6±5.7   | 30.4±4.5   | 0.527 |
| Phosphatidylcholines | PC ae C32:2 | 4.4±0.2    | 4.5±1     | 0.818  | 5±1.2      | 5.3±0.5    | 0.742 |
| Phosphatidylcholines | PC ae C34:0 | 32±4.2     | 28.6±7.4  | 0.506  | 43.8±7.3   | 42.9±9.2   | 0.901 |
| Phosphatidylcholines | PC ae C34:1 | 203.8±12.2 | 170±20.3  | 0.049* | 186.8±33.2 | 186±23.5   | 0.976 |
| Phosphatidylcholines | PC ae C34:2 | 77±3.3     | 65.5±12.4 | 0.171  | 88±18.2    | 93±7.4     | 0.677 |
| Phosphatidylcholines | PC ae C34:3 | 14.7±0.7   | 12±2.1    | 0.071  | 18.1±4.7   | 20.2±2.1   | 0.505 |
| Phosphatidylcholines | PC ae C36:0 | 7.5±0.5    | 8.6±2.8   | 0.539  | 10.3±2.3   | 12.5±1.8   | 0.215 |
| Phosphatidylcholines | PC ae C36:1 | 33.1±1.9   | 30.2±8    | 0.566  | 47.2±9.3   | 53.9±8.9   | 0.398 |
| Phosphatidylcholines | PC ae C36:2 | 34±1.6     | 26.1±4.9  | 0.035* | 51.2±12.8  | 54.6±8.8   | 0.717 |
| Phosphatidylcholines | PC ae C36:3 | 31.1±1.1   | 22.9±3.1  | 0.005* | 35.9±8.5   | 36.9±5.5   | 0.869 |
| Phosphatidylcholines | PC ae C36:4 | 201±6.8    | 180±32.4  | 0.313  | 223±50.7   | 227.8±27.1 | 0.891 |
| Phosphatidylcholines | PC ae C36:5 | 160.3±8.2  | 155±17.9  | 0.66   | 166±26.5   | 177.8±17   | 0.541 |
| Phosphatidylcholines | PC ae C38:0 | 50.9±5.4   | 46.9±7.3  | 0.472  | 39.8±5.6   | 40.6±11.1  | 0.909 |
| Phosphatidylcholines | PC ae C38:1 | 5.3±2      | 3±0.8     | 0.101  | 4.8±1.7    | 6.2±1.7    | 0.32  |
| Phosphatidylcholines | PC ae C38:2 | 8.9±0.4    | 6.5±1.5   | 0.038* | 12.3±3     | 14.1±1.8   | 0.409 |
| Phosphatidylcholines | PC ae C38:3 | 9.3±0.5    | 7.9±1.2   | 0.114  | 13.1±3.3   | 13.9±1.6   | 0.721 |
| Phosphatidylcholines | PC ae C38:4 | 55.6±4.2   | 50.1±11.7 | 0.471  | 81±11.2    | 83.9±10.3  | 0.755 |
| Phosphatidylcholines | PC ae C38:5 | 130.5±3.3  | 119.5±9.7 | 0.111  | 178.5±27.8 | 190.3±18.1 | 0.562 |
| Phosphatidylcholines | PC ae C38:6 | 1013±102.4 | 811±142   | 0.093  | 703.3±108  | 695.5±99.1 | 0.931 |
| Phosphatidylcholines | PC ae C40:1 | 101.1±5    | 89.5±13.2 | 0.202  | 99.9±6     | 90.9±17.4  | 0.43  |
| Phosphatidylcholines | PC ae C40:2 | 4.6±0.2    | 4.5±0.7   | 0.852  | 5.4±0.9    | 5.4±1.4    | 0.994 |
| Phosphatidylcholines | PC ae C40:3 | 4.8±1.1    | 4.9±2.3   | 0.94   | 5.1±0.9    | 4.8±0.8    | 0.614 |
| Phosphatidylcholines | PC ae C40:4 | 12.8±1     | 12.2±2.9  | 0.72   | 16.6±2.8   | 15.9±3.9   | 0.818 |
| Phosphatidylcholines | PC ae C40:5 | 12.2±1.3   | 12.2±2.4  | 0.975  | 15.5±2.6   | 16.8±1.1   | 0.434 |

|                             |                     |          |          |        |           |           |       |
|-----------------------------|---------------------|----------|----------|--------|-----------|-----------|-------|
| <b>Phosphatidylcholines</b> | PC ae C40:6         | 71.3±4.2 | 51.2±8.9 | 0.012* | 69.7±10.7 | 72.7±14.5 | 0.782 |
| <b>Phosphatidylcholines</b> | PC ae C42:0         | 6.6±0.5  | 5.6±0.3  | 0.012* | 6.8±1.1   | 6.9±0.8   | 0.993 |
| <b>Phosphatidylcholines</b> | PC ae C42:1         | 8.3±0.7  | 7.5±1.2  | 0.311  | 9.9±1.5   | 10.6±1.1  | 0.53  |
| <b>Phosphatidylcholines</b> | PC ae C42:2         | 5.7±0.4  | 6.1±0.7  | 0.417  | 5.8±0.4   | 6.3±0.6   | 0.191 |
| <b>Phosphatidylcholines</b> | PC ae C42:3         | 24.6±1.2 | 27±4.7   | 0.419  | 15.8±1.8  | 16.3±4.7  | 0.874 |
| <b>Phosphatidylcholines</b> | PC ae C42:4         | 1.6±0.2  | 1.5±0.3  | 0.647  | 1.6±0.4   | 1.7±0.3   | 0.688 |
| <b>Phosphatidylcholines</b> | PC ae C42:5         | 3.9±0.3  | 3.7±0.6  | 0.429  | 3.8±0.4   | 3.8±0.3   | 0.899 |
| <b>Phosphatidylcholines</b> | PC ae C44:3         | 1.7±0.2  | 1.4±0.2  | 0.096  | 1.6±0.3   | 1.5±0.4   | 0.855 |
| <b>Phosphatidylcholines</b> | PC ae C44:4         | 1.5±0.2  | 1.3±0.1  | 0.053  | 1.3±0.2   | 1.3±0.4   | 0.819 |
| <b>Phosphatidylcholines</b> | PC ae C44:5         | 2.4±0.1  | 2±0.4    | 0.131  | 1.6±0.3   | 1.6±0.4   | 0.875 |
| <b>Phosphatidylcholines</b> | PC ae C44:6         | 1±0.2    | 1±0.1    | 0.848  | 1±0.4     | 1±0.2     | 0.991 |
| <b>Dihexosylceramides</b>   | Hex2Cer(d18:1/14:0) | 2±0.4    | 1.8±0.5  | 0.547  | 2±0.6     | 2.3±0.7   | 0.548 |
| <b>Dihexosylceramides</b>   | Hex2Cer(d18:1/16:0) | 3.6±0.6  | 3.1±0.7  | 0.327  | 3.9±0.9   | 4±0.9     | 0.869 |
| <b>Dihexosylceramides</b>   | Hex2Cer(d18:1/18:0) | 3.2±0.6  | 2.6±0.6  | 0.289  | 2.8±0.6   | 2.9±0.7   | 0.765 |
| <b>Dihexosylceramides</b>   | Hex2Cer(d18:1/20:0) | 0.3±0.1  | 0.3±0.1  | 0.549  | 0.4±0.1   | 0.5±0.1   | 0.553 |
| <b>Dihexosylceramides</b>   | Hex2Cer(d18:1/22:0) | 0.8±0.2  | 0.8±0.3  | 0.945  | 0.8±0.1   | 0.9±0.1   | 0.112 |
| <b>Dihexosylceramides</b>   | Hex2Cer(d18:1/24:0) | 0.7±0.1  | 0.7±0.2  | 0.735  | 0.8±0.1   | 0.8±0.1   | 0.24  |
| <b>Dihexosylceramides</b>   | Hex2Cer(d18:1/24:1) | 0.4±0.1  | 0.4±0.1  | 0.94   | 0.5±0.1   | 0.6±0.1   | 0.444 |
| <b>Dihexosylceramides</b>   | Hex2Cer(d18:1/26:0) | 0.1±0.1  | 0.1±0.1  | 0.067  | 0.1±0.1   | 0.1±0.1   | 0.999 |
| <b>Dihexosylceramides</b>   | Hex2Cer(d18:1/26:1) | 0.3±0.1  | 0.4±0.2  | 0.362  | 0.4±0.1   | 0.4±0.1   | 0.492 |
| <b>Trihexosylceramides</b>  | Hex3Cer(d18:1/16:0) | 1.7±0.2  | 1.6±0.2  | 0.289  | 4.2±0.7   | 4.3±1.4   | 0.898 |
| <b>Trihexosylceramides</b>  | Hex3Cer(d18:1/18:0) | 0.6±0.2  | 0.6±0.1  | 0.829  | 1±0.3     | 1.1±0.2   | 0.529 |
| <b>Trihexosylceramides</b>  | Hex3Cer(d18:1/24:1) | 1.2±0.1  | 1.1±0.2  | 0.092  | 2.8±0.6   | 2.8±0.6   | 0.926 |
| <b>Trihexosylceramides</b>  | Hex3Cer(d18:1/26:1) | 1.7±0.2  | 1.9±0.3  | 0.452  | 1.7±0.9   | 1.8±0.4   | 0.748 |
| <b>Trihexosylceramides</b>  | Hex3Cer(d18:1_20:0) | 1.3±0.2  | 1.1±0.2  | 0.161  | 3.6±1.4   | 3.5±0.7   | 0.847 |
| <b>Trihexosylceramides</b>  | Hex3Cer(d18:1_22:0) | 2.9±0.3  | 2.7±0.5  | 0.566  | 6.5±2     | 6.4±1.5   | 0.934 |
| <b>Hexosylceramides</b>     | HexCer(d16:1/22:0)  | 0.1±0.1  | 0.1±0.1  | 0.128  | 0.1±0.1   | 0.1±0.1   | 0.78  |
| <b>Hexosylceramides</b>     | HexCer(d18:1/14:0)  | 0.1±0.1  | 0.1±0.1  | 0.253  | 0.1±0.1   | 0.1±0.1   | 0.306 |
| <b>Hexosylceramides</b>     | HexCer(d18:1/16:0)  | 3.3±0.5  | 3.3±0.5  | 0.938  | 5.4±1     | 5.7±0.5   | 0.617 |
| <b>Hexosylceramides</b>     | HexCer(d18:1/18:0)  | 0.8±0.1  | 0.9±0.2  | 0.264  | 1.4±0.5   | 1.3±0.2   | 0.796 |
| <b>Hexosylceramides</b>     | HexCer(d18:1/18:1)  | 0.4±0.1  | 0.4±0.1  | 0.166  | 0.5±0.2   | 0.5±0.1   | 0.706 |
| <b>Hexosylceramides</b>     | HexCer(d18:1/20:0)  | 2.8±0.5  | 2.7±0.5  | 0.626  | 5.5±2     | 5.2±0.6   | 0.83  |
| <b>Hexosylceramides</b>     | HexCer(d18:1/22:0)  | 14.6±1.8 | 12.6±2.6 | 0.295  | 20.6±4.6  | 22±2.2    | 0.649 |
| <b>Hexosylceramides</b>     | HexCer(d18:1/23:0)  | 3.6±0.5  | 3±0.5    | 0.237  | 4.9±0.9   | 5.2±1.2   | 0.752 |
| <b>Hexosylceramides</b>     | HexCer(d18:1/24:0)  | 7.4±0.3  | 6.3±0.7  | 0.036* | 8.9±1.7   | 8.9±0.5   | 0.981 |
| <b>Hexosylceramides</b>     | HexCer(d18:1/24:1)  | 15.5±2.5 | 13.7±1.8 | 0.366  | 17.8±2.3  | 19.7±2.8  | 0.386 |
| <b>Hexosylceramides</b>     | HexCer(d18:1/26:0)  | 0.3±0.1  | 0.3±0.1  | 0.33   | 0.3±0.1   | 0.4±0.1   | 0.715 |
| <b>Hexosylceramides</b>     | HexCer(d18:1/26:1)  | 0.9±0.2  | 0.9±0.3  | 0.804  | 1±0.2     | 1.2±0.2   | 0.159 |
| <b>Hexosylceramides</b>     | HexCer(d18:2/16:0)  | 0.2±0.1  | 0.2±0.1  | 0.774  | 0.2±0.1   | 0.3±0.1   | 0.43  |

|                                |                         |            |              |        |              |            |                     |
|--------------------------------|-------------------------|------------|--------------|--------|--------------|------------|---------------------|
| <b>Hexosylceramides</b>        | HexCer(d18:2/20:0)      | 0.1±0.1    | 0.1±0.1      | 0.59   | 0.2±0.1      | 0.2±0.1    | 0.801               |
| <b>Hexosylceramides</b>        | HexCer(d18:2/22:0)      | 1.6±0.2    | 1.3±0.1      | 0.038* | 2.4±0.6      | 2.1±0.5    | 0.545               |
| <b>Hexosylceramides</b>        | HexCer(d18:2/23:0)      | 0.8±0.2    | 0.6±0.2      | 0.097  | 1±0.2        | 0.8±0.2    | 0.448               |
| <b>Hexosylceramides</b>        | HexCer(d18:2/24:0)      | 4.4±0.4    | 3.4±0.2      | 0.009* | 5.8±1.1      | 5.4±1.2    | 0.662               |
| <b>Indoles and derivatives</b> | Indoleacetic acid       | 2±0.7      | 1.3±0.2      | 0.123  | 4.4±3        | 6.6±3.5    | 0.429               |
| <b>Indoles and derivatives</b> | Indole-3-propionic acid | 0.9±0.4    | 0.7±0.3      | 0.461  | 2.3±1.5      | 1.8±0.8    | 0.635               |
| <b>Indoles and derivatives</b> | Indoxyl sulfate         | 1.8±0.5    | 1.8±1        | 0.985  | 3.1±1.7      | 5.8±3      | 0.216               |
| <b>Sphingomyelins</b>          | SM (OH) C14:1           | 21±1.5     | 18.9±3.4     | 0.36   | 20.9±2.7     | 20±4.7     | 0.781               |
| <b>Sphingomyelins</b>          | SM (OH) C16:1           | 9.4±0.4    | 7.9±1.4      | 0.122  | 13±3.3       | 13.4±3.9   | 0.904               |
| <b>Sphingomyelins</b>          | SM (OH) C22:1           | 49.8±2.7   | 39.9±8.7     | 0.107  | 53.1±8.1     | 54±14.6    | 0.925               |
| <b>Sphingomyelins</b>          | SM (OH) C22:2           | 16.7±0.5   | 13.8±4.3     | 0.283  | 16±2.8       | 16.9±5.6   | 0.813               |
| <b>Sphingomyelins</b>          | SM (OH) C24:1           | 5.6±1.1    | 4.8±1        | 0.385  | 5.1±0.6      | 5.5±1.2    | 0.555               |
| <b>Sphingomyelins</b>          | SM C16:0                | 1223.3±110 | 1117.5±115.5 | 0.295  | 1092.3±103.4 | 1133±211.1 | 0.775               |
| <b>Sphingomyelins</b>          | SM C16:1                | 221.5±19.5 | 199±12.6     | 0.143  | 204±11.9     | 213±30.4   | 0.649               |
| <b>Sphingomyelins</b>          | SM C18:0                | 60.9±5.3   | 58.2±6.5     | 0.591  | 56.9±7.8     | 59.7±5.9   | 0.632               |
| <b>Sphingomyelins</b>          | SM C18:1                | 10±1.1     | 9.7±1.5      | 0.775  | 8.6±0.9      | 9.3±1      | 0.331               |
| <b>Sphingomyelins</b>          | SM C20:2                | 0.2±0.2    | 0.2±0.2      | 0.962  | 0.2±0.2      | 0.2±0.3    | 0.884               |
| <b>Sphingomyelins</b>          | SM C22:3                | 3.9±0.8    | 3.2±2.3      | 0.635  | 3.7±2.5      | 3.5±2      | 0.952               |
| <b>Sphingomyelins</b>          | SM C24:0                | 232.3±6.1  | 204.8±26.5   | 0.131  | 214.5±28.6   | 224±40.2   | 0.75                |
| <b>Sphingomyelins</b>          | SM C24:1                | 343.5±17.3 | 309.5±32.4   | 0.16   | 305±30.6     | 319±50.2   | 0.695               |
| <b>Sphingomyelins</b>          | SM C26:0                | 1.3±0.2    | 1.3±0.5      | 0.98   | 1.3±0.2      | 2±0.5      | 0.038* <sup>§</sup> |
| <b>Sphingomyelins</b>          | SM C26:1                | 1.7±0.5    | 1.3±0.1      | 0.134  | 1.5±0.3      | 1.6±0.5    | 0.873               |
| <b>Triacylglycerole</b>        | TG(14:0_32:2)           | 2.7±2.4    | 2.8±2.3      | 0.991  | 0.8±0.5      | 5.5±7.7    | 0.331               |
| <b>Triacylglycerole</b>        | TG(14:0_34:0)           | 3.8±3.7    | 4.5±4.7      | 0.847  | 1.1±0.4      | 7.1±9.7    | 0.32                |
| <b>Triacylglycerole</b>        | TG(14:0_34:1)           | 23.9±23.1  | 26.9±29.7    | 0.894  | 4.5±1.2      | 48.8±70.7  | 0.32                |
| <b>Triacylglycerole</b>        | TG(14:0_34:2)           | 21±18.6    | 22.5±26      | 0.938  | 4.2±1.6      | 43±58.4    | 0.295               |
| <b>Triacylglycerole</b>        | TG(14:0_34:3)           | 3.4±3.3    | 3.8±4.1      | 0.899  | 0.8±0.3      | 8.3±11.5   | 0.303               |
| <b>Triacylglycerole</b>        | TG(14:0_35:1)           | 0.5±0.3    | 0.5±0.3      | 0.902  | 0.2±0.2      | 1±1        | 0.209               |
| <b>Triacylglycerole</b>        | TG(14:0_35:2)           | 0.5±0.5    | 0.4±0.4      | 0.766  | 0.3±0.1      | 1±1.1      | 0.308               |
| <b>Triacylglycerole</b>        | TG(14:0_36:1)           | 7.4±6.6    | 6.8±8.4      | 0.927  | 0.8±0.2      | 10.1±15.1  | 0.33                |
| <b>Triacylglycerole</b>        | TG(14:0_36:2)           | 24.1±21.9  | 21.4±25.5    | 0.895  | 2.6±0.5      | 34.8±51.7  | 0.322               |
| <b>Triacylglycerole</b>        | TG(14:0_36:3)           | 20.4±18.2  | 16.7±21.1    | 0.825  | 3.3±0.9      | 30.1±42.2  | 0.313               |
| <b>Triacylglycerole</b>        | TG(14:0_36:4)           | 5.1±3.9    | 4±4.4        | 0.766  | 1.5±0.4      | 7.9±9      | 0.26                |
| <b>Triacylglycerole</b>        | TG(14:0_38:4)           | 0.8±0.2    | 0.9±0.5      | 0.788  | 0.5±0.2      | 1.2±0.6    | 0.081               |
| <b>Triacylglycerole</b>        | TG(14:0_38:5)           | 0.5±0.2    | 0.7±0.4      | 0.428  | 0.3±0.2      | 0.7±0.4    | 0.102               |
| <b>Triacylglycerole</b>        | TG(16:0_28:1)           | 1.7±0.9    | 2.1±0.9      | 0.596  | 0.5±0.2      | 3.6±4.1    | 0.229               |
| <b>Triacylglycerole</b>        | TG(16:0_28:2)           | 0.8±0.5    | 0.9±0.5      | 0.833  | 0.5±0.2      | 2.1±2.1    | 0.236               |
| <b>Triacylglycerole</b>        | TG(16:0_30:2)           | 2.1±2.1    | 3.6±2        | 0.376  | 0.7±0.5      | 5.1±6.1    | 0.262               |
| <b>Triacylglycerole</b>        | TG(16:0_32:0)           | 32.9±34.2  | 40.2±38.2    | 0.813  | 10.5±5.7     | 67.3±74.4  | 0.235               |



|                  |               |             |             |       |           |             |         |
|------------------|---------------|-------------|-------------|-------|-----------|-------------|---------|
| Triacylglycerole | TG(16:0_32:1) | 51.7±50.6   | 60.2±64.9   | 0.863 | 10.6±3.9  | 154±228.9   | 0.32    |
| Triacylglycerole | TG(16:0_32:2) | 22.3±20.6   | 25.2±28.9   | 0.89  | 5.9±2.1   | 56.6±78.9   | 0.308   |
| Triacylglycerole | TG(16:0_32:3) | 1.5±1.3     | 1.8±1.7     | 0.797 | 0.7±0.3   | 3.7±4.2     | 0.251   |
| Triacylglycerole | TG(16:0_33:1) | 2.7±2.2     | 3.4±2.2     | 0.733 | 1.6±0.8   | 8±7.1       | 0.169   |
| Triacylglycerole | TG(16:0_33:2) | 1.7±1       | 1.7±1.5     | 0.955 | 1.4±0.4   | 4.9±4.4     | 0.219   |
| Triacylglycerole | TG(16:0_34:0) | 21.4±21.8   | 25.6±27.2   | 0.84  | 7±1.8     | 47.7±60.4   | 0.288   |
| Triacylglycerole | TG(16:0_34:1) | 207.6±187.6 | 227.7±246.1 | 0.914 | 55.7±17.2 | 525.7±714.4 | 0.299   |
| Triacylglycerole | TG(16:0_34:2) | 186.2±166.6 | 191.7±222   | 0.974 | 62.1±19.7 | 465.6±598   | 0.287   |
| Triacylglycerole | TG(16:0_34:3) | 37.3±31.3   | 35.3±44     | 0.953 | 9±4.4     | 97±133.1    | 0.296   |
| Triacylglycerole | TG(16:0_34:4) | 1.4±1       | 2.1±1.8     | 0.591 | 1.1±0.4   | 4.3±4.3     | 0.246   |
| Triacylglycerole | TG(16:0_35:1) | 2.6±2.2     | 2.8±2.5     | 0.901 | 1.1±0.4   | 8.9±11.7    | 0.294   |
| Triacylglycerole | TG(16:0_35:2) | 3.4±2.7     | 3.4±3.4     | 0.986 | 1.8±0.3   | 9.1±10.5    | 0.271   |
| Triacylglycerole | TG(16:0_35:3) | 1.6±1.4     | 1.4±1.6     | 0.908 | 0.9±0.3   | 3.9±3.5     | 0.198   |
| Triacylglycerole | TG(16:0_36:2) | 236.1±226.3 | 201.8±246.6 | 0.865 | 37.8±8.4  | 391.1±549   | 0.308   |
| Triacylglycerole | TG(16:0_36:3) | 211.3±190.5 | 167.3±215   | 0.8   | 53.5±11.3 | 379.3±490.3 | 0.294   |
| Triacylglycerole | TG(16:0_36:4) | 52.9±42.7   | 43±51.3     | 0.807 | 25.8±6.7  | 108.9±117.9 | 0.269   |
| Triacylglycerole | TG(16:0_36:5) | 3.2±2.1     | 3.1±3.3     | 0.989 | 2±0.5     | 7.3±7.3     | 0.251   |
| Triacylglycerole | TG(16:0_36:6) | 0.7±0.1     | 0.9±0.6     | 0.417 | 0.5±0.1   | 1±0.6       | 0.163   |
| Triacylglycerole | TG(16:0_37:3) | 1±0.8       | 0.9±1       | 0.831 | 0.6±0.1   | 2.9±3.6     | 0.295   |
| Triacylglycerole | TG(16:0_38:1) | 1.7±1.4     | 2.1±2.5     | 0.778 | 0.7±0.1   | 3.7±4.4     | 0.277   |
| Triacylglycerole | TG(16:0_38:2) | 6.7±6.1     | 5.9±6.9     | 0.879 | 2.2±0.5   | 11±13.9     | 0.315   |
| Triacylglycerole | TG(16:0_38:3) | 6.6±5.4     | 5.6±6.2     | 0.831 | 2.9±0.5   | 12.1±13.5   | 0.281   |
| Triacylglycerole | TG(16:0_38:4) | 4.3±2.8     | 5.2±3.9     | 0.753 | 3.9±0.8   | 9.3±5.9     | 0.166   |
| Triacylglycerole | TG(16:0_38:5) | 4.7±2.4     | 6±3.7       | 0.624 | 4.3±0.8   | 8.7±4.7     | 0.15    |
| Triacylglycerole | TG(16:0_38:6) | 5±1.5       | 7±3.8       | 0.42  | 4.4±1.4   | 6.5±2.3     | 0.221   |
| Triacylglycerole | TG(16:0_38:7) | 0.7±0.5     | 1±0.5       | 0.573 | 0.6±0.3   | 1.9±1.9     | 0.28    |
| Triacylglycerole | TG(16:0_40:6) | 1.6±0.8     | 1.8±1.1     | 0.727 | 1.6±0.5   | 3.2±0.9     | 0.027*§ |
| Triacylglycerole | TG(16:0_40:7) | 1.9±0.8     | 2.4±1.5     | 0.586 | 2.2±0.9   | 3.4±1.4     | 0.246   |
| Triacylglycerole | TG(16:0_40:8) | 1.6±0.6     | 1.6±1.2     | 0.961 | 1.9±0.7   | 2.1±0.9     | 0.763   |
| Triacylglycerole | TG(16:1_28:0) | 0.7±0.4     | 1.2±1.1     | 0.452 | 0.5±0.4   | 1.5±2.6     | 0.502   |
| Triacylglycerole | TG(16:1_30:1) | 1.9±1.7     | 1.9±1.4     | 0.988 | 0.2±0.4   | 6±9.3       | 0.323   |
| Triacylglycerole | TG(16:1_32:0) | 12.9±12.6   | 16.7±15.7   | 0.755 | 2.7±2     | 52.2±78.5   | 0.317   |
| Triacylglycerole | TG(16:1_32:1) | 12.6±12.9   | 15±16.1     | 0.848 | 1.2±1.8   | 52.3±82.5   | 0.325   |
| Triacylglycerole | TG(16:1_32:2) | 4.3±4.1     | 4.9±5.1     | 0.89  | 0.8±0.9   | 16.1±24.7   | 0.323   |
| Triacylglycerole | TG(16:1_33:1) | 0.7±0.7     | 0.7±0.8     | 0.909 | 0.3±0.1   | 2.2±3       | 0.299   |
| Triacylglycerole | TG(16:1_34:0) | 8.8±8.5     | 9.1±10.1    | 0.97  | 1.4±0.6   | 25.2±37.8   | 0.318   |
| Triacylglycerole | TG(16:1_34:1) | 58±56.4     | 56.8±65     | 0.982 | 8.9±3.8   | 150.7±227.9 | 0.323   |
| Triacylglycerole | TG(16:1_34:2) | 45.1±40.5   | 42.3±51.6   | 0.945 | 8±3.7     | 123.5±182.4 | 0.315   |
| Triacylglycerole | TG(16:1_34:3) | 7.3±6.6     | 7±8.4       | 0.956 | 1.7±0.7   | 24.5±36.1   | 0.316   |

|                  |               |           |           |       |         |             |       |
|------------------|---------------|-----------|-----------|-------|---------|-------------|-------|
| Triacylglycerole | TG(16:1_36:1) | 18±18     | 14.4±16.8 | 0.807 | 1.6±0.5 | 32.3±49.1   | 0.321 |
| Triacylglycerole | TG(16:1_36:2) | 69.1±66.2 | 50.3±58   | 0.725 | 6.6±2.1 | 126.3±190.1 | 0.317 |
| Triacylglycerole | TG(16:1_36:3) | 48.6±44.4 | 34.5±42.9 | 0.706 | 8.2±2.7 | 99.9±141.4  | 0.305 |
| Triacylglycerole | TG(16:1_36:4) | 9.6±7.7   | 6.7±8.2   | 0.675 | 3.5±1.1 | 21.6±27     | 0.29  |
| Triacylglycerole | TG(16:1_36:5) | 0.7±0.6   | 0.5±0.6   | 0.729 | 0.3±0.1 | 1.5±1.7     | 0.257 |
| Triacylglycerole | TG(16:1_38:3) | 2±1.8     | 1.6±1.8   | 0.768 | 0.6±0.2 | 3.7±4.6     | 0.285 |
| Triacylglycerole | TG(16:1_38:4) | 1.4±0.8   | 1.3±0.9   | 0.947 | 1±0.2   | 2.5±2.3     | 0.279 |
| Triacylglycerole | TG(16:1_38:5) | 0.8±0.5   | 0.8±0.6   | 0.933 | 0.7±0.2 | 1.8±1.5     | 0.275 |
| Triacylglycerole | TG(17:0_32:1) | 0.4±0.4   | 0.4±0.4   | 0.98  | 0.3±0.3 | 1.6±2.1     | 0.327 |
| Triacylglycerole | TG(17:0_34:1) | 1.9±1.5   | 1.8±1.5   | 0.93  | 0.9±0.2 | 5.7±7.1     | 0.282 |
| Triacylglycerole | TG(17:0_34:2) | 2±1.7     | 1.6±1.7   | 0.783 | 0.8±0.3 | 5.1±6       | 0.265 |
| Triacylglycerole | TG(17:0_34:3) | 0.5±0.4   | 0.4±0.4   | 0.858 | 0.2±0.2 | 1±1.2       | 0.249 |
| Triacylglycerole | TG(17:0_36:3) | 2.1±1.8   | 1.4±1.5   | 0.635 | 0.9±0.3 | 4.1±4.1     | 0.23  |
| Triacylglycerole | TG(17:0_36:4) | 0.7±0.5   | 0.6±0.4   | 0.733 | 0.6±0.2 | 1.5±1.1     | 0.172 |
| Triacylglycerole | TG(17:1_32:1) | 0.6±0.5   | 1±0.7     | 0.471 | 0.5±0.3 | 1.8±1.9     | 0.264 |
| Triacylglycerole | TG(17:1_34:1) | 2.6±2     | 2.3±2.2   | 0.846 | 0.8±0.4 | 5.2±6.2     | 0.261 |
| Triacylglycerole | TG(17:1_34:2) | 2±1.7     | 1.7±1.7   | 0.828 | 0.9±0.2 | 4.2±4.8     | 0.277 |
| Triacylglycerole | TG(17:1_34:3) | 0.5±0.4   | 0.4±0.4   | 0.684 | 0.3±0.1 | 1.1±1.1     | 0.207 |
| Triacylglycerole | TG(17:1_36:3) | 2.5±2.3   | 1.5±1.7   | 0.571 | 0.7±0.2 | 4±4.6       | 0.258 |
| Triacylglycerole | TG(17:1_36:4) | 0.7±0.4   | 0.5±0.5   | 0.557 | 0.5±0.1 | 1.5±1.3     | 0.229 |
| Triacylglycerole | TG(17:1_38:5) | 0.4±0.1   | 0.3±0.1   | 0.136 | 0.4±0.1 | 0.6±0.1     | 0.055 |
| Triacylglycerole | TG(17:1_38:6) | 0.3±0.1   | 0.2±0.1   | 0.43  | 0.2±0.1 | 0.3±0.1     | 0.148 |
| Triacylglycerole | TG(17:1_38:7) | 0.1±0.1   | 0.1±0.1   | 0.177 | 0.1±0.1 | 0.1±0.1     | 0.258 |
| Triacylglycerole | TG(17:2_34:2) | 0.3±0.2   | 0.2±0.2   | 0.597 | 0.2±0.1 | 0.6±0.6     | 0.235 |
| Triacylglycerole | TG(17:2_36:2) | 0.5±0.4   | 0.4±0.3   | 0.556 | 0.3±0.1 | 0.9±1       | 0.306 |
| Triacylglycerole | TG(17:2_36:3) | 0.5±0.4   | 0.4±0.3   | 0.545 | 0.3±0.1 | 1±1.1       | 0.244 |
| Triacylglycerole | TG(17:2_36:4) | 0.5±0.3   | 0.4±0.3   | 0.632 | 0.4±0.1 | 0.8±0.5     | 0.214 |
| Triacylglycerole | TG(17:2_38:5) | 0.3±0.2   | 0.3±0.2   | 0.608 | 0.3±0.1 | 0.5±0.2     | 0.069 |
| Triacylglycerole | TG(17:2_38:6) | 0.4±0.2   | 0.3±0.2   | 0.512 | 0.2±0.1 | 0.5±0.3     | 0.183 |
| Triacylglycerole | TG(17:2_38:7) | 0.1±0.1   | 0.1±0.1   | 0.593 | 0.1±0.1 | 0.2±0.2     | 0.331 |
| Triacylglycerole | TG(18:0_30:0) | 1.5±1.3   | 1.6±1.6   | 0.912 | 0.5±0.2 | 2.1±2.9     | 0.359 |
| Triacylglycerole | TG(18:0_30:1) | 1.3±1.1   | 1.6±1.5   | 0.778 | 0.5±0.3 | 2.6±3.7     | 0.352 |
| Triacylglycerole | TG(18:0_32:0) | 4.8±4.3   | 5±5       | 0.968 | 1.9±0.7 | 7.6±7.5     | 0.239 |
| Triacylglycerole | TG(18:0_32:1) | 10.1±9.9  | 9.8±11.1  | 0.977 | 1.5±0.4 | 22.2±33.3   | 0.322 |
| Triacylglycerole | TG(18:0_32:2) | 5.3±5.1   | 4.7±5.7   | 0.906 | 0.9±0.2 | 10.3±14.6   | 0.307 |
| Triacylglycerole | TG(18:0_34:2) | 40.2±37.2 | 31.4±38.5 | 0.787 | 8.9±2   | 83.3±116.2  | 0.31  |
| Triacylglycerole | TG(18:0_34:3) | 8.2±7.3   | 6.5±8.3   | 0.799 | 1.6±0.5 | 17.5±24.9   | 0.311 |
| Triacylglycerole | TG(18:0_36:1) | 11.8±11.5 | 9.4±11.8  | 0.805 | 1.6±0.3 | 17.1±24     | 0.304 |
| Triacylglycerole | TG(18:0_36:2) | 55.9±53.3 | 42.3±53.1 | 0.764 | 7.3±0.9 | 79.3±113.9  | 0.316 |

|                  |               |             |             |       |           |             |       |
|------------------|---------------|-------------|-------------|-------|-----------|-------------|-------|
| Triacylglycerole | TG(18:0_36:3) | 52.9±49.7   | 36±46.5     | 0.682 | 11.9±1.1  | 84.7±113.2  | 0.308 |
| Triacylglycerole | TG(18:0_36:4) | 14.6±12.3   | 9.6±11.5    | 0.627 | 6±0.9     | 28.1±33.3   | 0.293 |
| Triacylglycerole | TG(18:0_36:5) | 1.1±0.8     | 1±1         | 0.884 | 0.6±0.1   | 2.1±2.3     | 0.295 |
| Triacylglycerole | TG(18:0_38:6) | 1.3±0.5     | 1.4±0.9     | 0.897 | 1.7±0.3   | 2.1±0.3     | 0.077 |
| Triacylglycerole | TG(18:0_38:7) | 0.3±0.1     | 0.3±0.2     | 0.574 | 0.2±0.1   | 0.5±0.3     | 0.112 |
| Triacylglycerole | TG(18:1_26:0) | 2.5±1.3     | 2.7±1.2     | 0.846 | 1.2±0.3   | 2.8±2.9     | 0.365 |
| Triacylglycerole | TG(18:1_28:1) | 2.5±0.8     | 1.9±1       | 0.403 | 0.5±0.4   | 3.2±3.9     | 0.283 |
| Triacylglycerole | TG(18:1_30:0) | 18.3±16.8   | 21.5±20.2   | 0.837 | 3.6±1.3   | 34.2±46.2   | 0.296 |
| Triacylglycerole | TG(18:1_30:1) | 8.8±7.9     | 10±7.7      | 0.86  | 2±1.5     | 18±27.2     | 0.347 |
| Triacylglycerole | TG(18:1_30:2) | 2.9±1.4     | 2.8±1.4     | 0.921 | 1.2±0.6   | 4.6±6.1     | 0.372 |
| Triacylglycerole | TG(18:1_32:0) | 90.7±83.1   | 99.1±99.9   | 0.914 | 29.5±9.3  | 212.2±271.7 | 0.289 |
| Triacylglycerole | TG(18:1_32:1) | 81.6±77.9   | 75.5±85.8   | 0.931 | 10.7±3.3  | 173±258.3   | 0.319 |
| Triacylglycerole | TG(18:1_32:2) | 28.4±25.5   | 23.8±28.8   | 0.843 | 4.2±1.2   | 57.2±84.3   | 0.318 |
| Triacylglycerole | TG(18:1_32:3) | 2±1.6       | 1.5±1.6     | 0.724 | 0.5±0.2   | 4±5.2       | 0.285 |
| Triacylglycerole | TG(18:1_33:0) | 1.9±1.5     | 1.9±1.6     | 0.972 | 0.9±0.1   | 3.7±4.1     | 0.286 |
| Triacylglycerole | TG(18:1_33:1) | 4.3±3.8     | 3.7±3.5     | 0.854 | 1.8±0.6   | 8.7±9.7     | 0.263 |
| Triacylglycerole | TG(18:1_33:2) | 2.3±1.8     | 1.6±1.8     | 0.601 | 1±0.3     | 4.7±4.7     | 0.216 |
| Triacylglycerole | TG(18:1_33:3) | 0.5±0.3     | 0.3±0.3     | 0.38  | 0.2±0.1   | 0.7±0.6     | 0.13  |
| Triacylglycerole | TG(18:1_34:1) | 371.8±351.9 | 324.8±386.4 | 0.882 | 61.8±10   | 604.7±828.3 | 0.3   |
| Triacylglycerole | TG(18:1_34:2) | 293.5±268.4 | 239.1±301.1 | 0.824 | 61.1±10.6 | 548±740.2   | 0.299 |
| Triacylglycerole | TG(18:1_34:3) | 50.9±47.1   | 38.9±49.6   | 0.771 | 10.2±2.9  | 108.8±152.5 | 0.306 |
| Triacylglycerole | TG(18:1_34:4) | 2.2±1.8     | 1.6±2       | 0.713 | 0.8±0.2   | 4.9±6       | 0.275 |
| Triacylglycerole | TG(18:1_35:2) | 6±5.5       | 4.1±4.3     | 0.652 | 1.5±0.3   | 10.6±12.3   | 0.247 |
| Triacylglycerole | TG(18:1_35:3) | 2.5±2.1     | 1.6±1.9     | 0.593 | 0.8±0.3   | 4.3±5.1     | 0.273 |
| Triacylglycerole | TG(18:1_36:0) | 12.8±12     | 9.8±11.3    | 0.758 | 2±0.5     | 17.5±24.2   | 0.309 |
| Triacylglycerole | TG(18:1_36:1) | 129.6±124.8 | 92±112.9    | 0.712 | 12.9±2    | 164.6±235.3 | 0.307 |
| Triacylglycerole | TG(18:1_36:2) | 423.1±406.7 | 274.6±330.5 | 0.641 | 47.5±12.6 | 501.9±691.2 | 0.299 |
| Triacylglycerole | TG(18:1_36:3) | 361.1±336.1 | 204.8±262.4 | 0.549 | 66.5±9.3  | 546.6±721.9 | 0.294 |
| Triacylglycerole | TG(18:1_36:4) | 72.7±63.9   | 42±53.1     | 0.546 | 27.1±3.9  | 136.6±157.4 | 0.274 |
| Triacylglycerole | TG(18:1_36:5) | 4.3±3.5     | 2.7±3.3     | 0.59  | 2±0.2     | 7.9±8.3     | 0.261 |
| Triacylglycerole | TG(18:1_36:6) | 0.5±0.2     | 0.4±0.3     | 0.472 | 0.4±0.1   | 0.9±0.6     | 0.213 |
| Triacylglycerole | TG(18:1_38:5) | 5±3.4       | 4.2±3.2     | 0.768 | 3.9±0.5   | 8.6±5.1     | 0.165 |
| Triacylglycerole | TG(18:1_38:6) | 3.5±1.8     | 3.4±2.1     | 0.969 | 3.3±0.8   | 4.9±2.2     | 0.245 |
| Triacylglycerole | TG(18:1_38:7) | 0.8±0.5     | 0.7±0.5     | 0.835 | 0.5±0.2   | 1.7±1.9     | 0.276 |
| Triacylglycerole | TG(18:2_28:0) | 3±1.5       | 3.3±1.6     | 0.825 | 0.5±0.2   | 4.7±4.8     | 0.183 |
| Triacylglycerole | TG(18:2_30:0) | 13.3±10.7   | 15.6±16     | 0.841 | 4.9±1.3   | 26.6±30.4   | 0.263 |
| Triacylglycerole | TG(18:2_30:1) | 4.6±3.2     | 4.5±3.8     | 0.967 | 1.1±0.4   | 8.9±11.9    | 0.301 |
| Triacylglycerole | TG(18:2_32:0) | 67±53.1     | 76.4±80.8   | 0.872 | 33.9±10.9 | 176.5±198.2 | 0.26  |
| Triacylglycerole | TG(18:2_32:1) | 38.9±34.4   | 36.1±44.4   | 0.933 | 8.8±3.4   | 84.4±115    | 0.299 |

|                  |               |             |             |       |           |             |       |
|------------------|---------------|-------------|-------------|-------|-----------|-------------|-------|
| Triacylglycerole | TG(18:2_32:2) | 10.4±9.5    | 9±11.4      | 0.867 | 3.1±1.2   | 22.5±29.5   | 0.299 |
| Triacylglycerole | TG(18:2_33:0) | 1.5±1.1     | 1.4±1.3     | 0.979 | 1.1±0.2   | 3.6±3.1     | 0.21  |
| Triacylglycerole | TG(18:2_33:1) | 2.6±2.2     | 2.1±2.1     | 0.804 | 1.6±0.5   | 5.5±5.1     | 0.226 |
| Triacylglycerole | TG(18:2_33:2) | 1.1±0.7     | 0.9±0.9     | 0.788 | 0.8±0.1   | 2.6±2.1     | 0.188 |
| Triacylglycerole | TG(18:2_34:0) | 37.8±33.6   | 31.5±39.8   | 0.844 | 11.4±2.3  | 77.6±101.6  | 0.302 |
| Triacylglycerole | TG(18:2_34:1) | 184.1±166   | 150.8±195.4 | 0.83  | 53.2±10.5 | 336.4±419.1 | 0.287 |
| Triacylglycerole | TG(18:2_34:2) | 109.7±94.6  | 82.8±109.3  | 0.758 | 42.7±11.2 | 233.5±279.4 | 0.282 |
| Triacylglycerole | TG(18:2_34:3) | 15.1±13     | 11.5±15.1   | 0.762 | 6±1.6     | 36.3±44     | 0.279 |
| Triacylglycerole | TG(18:2_34:4) | 0.8±0.7     | 0.7±0.7     | 0.771 | 0.7±0.2   | 2.1±1.8     | 0.231 |
| Triacylglycerole | TG(18:2_35:1) | 3±2.7       | 2±2.3       | 0.637 | 1.3±0.3   | 5.6±6       | 0.253 |
| Triacylglycerole | TG(18:2_35:2) | 2.7±2.3     | 1.8±2       | 0.63  | 1.3±0.2   | 5.3±5.5     | 0.246 |
| Triacylglycerole | TG(18:2_35:3) | 1±0.8       | 0.6±0.6     | 0.446 | 0.6±0.2   | 2±1.6       | 0.179 |
| Triacylglycerole | TG(18:2_36:0) | 8.5±7.6     | 6.2±8       | 0.725 | 2.2±0.3   | 14.6±19     | 0.301 |
| Triacylglycerole | TG(18:2_36:1) | 62.2±57.9   | 40.7±53.7   | 0.655 | 13.9±1.7  | 103.9±139.2 | 0.306 |
| Triacylglycerole | TG(18:2_36:2) | 175.2±159.9 | 107.2±140.2 | 0.6   | 40.2±6.3  | 282.4±365.5 | 0.295 |
| Triacylglycerole | TG(18:2_36:3) | 109.9±98.7  | 58.8±78     | 0.508 | 41.9±4.8  | 211.5±244.6 | 0.275 |
| Triacylglycerole | TG(18:2_36:4) | 24.1±19.7   | 13.8±16.5   | 0.51  | 16.9±3.4  | 51.3±48     | 0.262 |
| Triacylglycerole | TG(18:2_36:5) | 1.7±1.2     | 1.1±1.3     | 0.573 | 1.5±0.3   | 3.4±2.6     | 0.246 |
| Triacylglycerole | TG(18:2_38:4) | 4.2±2.3     | 3.4±2.6     | 0.695 | 4.3±0.7   | 7.8±3.5     | 0.142 |
| Triacylglycerole | TG(18:2_38:5) | 3±1.6       | 2.3±1.6     | 0.599 | 3.3±0.7   | 5.2±2.1     | 0.16  |
| Triacylglycerole | TG(18:2_38:6) | 2.2±0.9     | 1.8±1.1     | 0.68  | 2.7±1     | 2.8±1       | 0.889 |
| Triacylglycerole | TG(18:3_30:0) | 0.6±0.4     | 0.9±0.6     | 0.45  | 0.4±0.1   | 1.3±1.1     | 0.175 |
| Triacylglycerole | TG(18:3_32:0) | 2.4±1.7     | 3.6±2.9     | 0.567 | 1.8±0.7   | 7±6.2       | 0.196 |
| Triacylglycerole | TG(18:3_32:1) | 1.2±1.1     | 1.5±1.7     | 0.79  | 0.6±0.2   | 3.5±4.1     | 0.257 |
| Triacylglycerole | TG(18:3_34:0) | 1.7±1.3     | 1.5±1.8     | 0.901 | 0.7±0.2   | 3.5±3.8     | 0.259 |
| Triacylglycerole | TG(18:3_34:1) | 7.9±6.3     | 7.4±8.3     | 0.933 | 3.4±0.9   | 16.5±18.2   | 0.259 |
| Triacylglycerole | TG(18:3_34:2) | 4.2±3.1     | 3.8±4.6     | 0.9   | 2.1±0.4   | 10.3±11.1   | 0.248 |
| Triacylglycerole | TG(18:3_34:3) | 0.8±0.5     | 0.6±0.6     | 0.6   | 0.4±0.2   | 1.5±1.5     | 0.241 |
| Triacylglycerole | TG(18:3_35:2) | 0.2±0.2     | 0.2±0.2     | 0.645 | 0.1±0.1   | 0.4±0.4     | 0.196 |
| Triacylglycerole | TG(18:3_36:1) | 2.9±2.3     | 2±2.5       | 0.673 | 1±0.3     | 5±6.2       | 0.309 |
| Triacylglycerole | TG(18:3_36:2) | 7.5±6.5     | 4.7±5.9     | 0.602 | 2.5±0.4   | 12.4±14.5   | 0.279 |
| Triacylglycerole | TG(18:3_36:3) | 4.1±3.3     | 2.7±3.2     | 0.623 | 2.1±0.3   | 8±8         | 0.249 |
| Triacylglycerole | TG(18:3_36:4) | 1.3±0.7     | 0.8±0.9     | 0.519 | 1±0.3     | 2.1±1.6     | 0.266 |
| Triacylglycerole | TG(18:3_38:5) | 0.2±0.1     | 0.2±0.2     | 0.999 | 0.3±0.1   | 0.4±0.2     | 0.223 |
| Triacylglycerole | TG(18:3_38:6) | 0.3±0.1     | 0.3±0.2     | 0.735 | 0.3±0.1   | 0.4±0.2     | 0.456 |
| Triacylglycerole | TG(20:0_32:3) | 0.6±0.5     | 0.5±0.6     | 0.806 | 0.3±0.1   | 1.1±1.2     | 0.259 |
| Triacylglycerole | TG(20:0_32:4) | 0.5±0.4     | 0.4±0.5     | 0.858 | 0.3±0.1   | 0.9±0.9     | 0.268 |
| Triacylglycerole | TG(20:1_30:1) | 0.5±0.2     | 0.3±0.2     | 0.141 | 0.2±0.1   | 0.5±0.6     | 0.421 |
| Triacylglycerole | TG(20:1_32:1) | 1.7±1.6     | 1.6±1.7     | 0.953 | 0.4±0.1   | 2.8±3.9     | 0.322 |

|                  |               |          |          |       |          |           |                     |
|------------------|---------------|----------|----------|-------|----------|-----------|---------------------|
| Triacylglycerole | TG(20:1_32:2) | 1.2±1.2  | 0.9±1    | 0.765 | 0.3±0.2  | 1.7±2.2   | 0.31                |
| Triacylglycerole | TG(20:1_32:3) | 0.3±0.2  | 0.3±0.3  | 0.988 | 0.1±0.1  | 0.6±0.7   | 0.277               |
| Triacylglycerole | TG(20:1_34:0) | 1.3±1    | 1.2±1.2  | 0.928 | 0.6±0.1  | 2±2.2     | 0.32                |
| Triacylglycerole | TG(20:1_34:1) | 7.5±6.9  | 6.6±7.5  | 0.876 | 2.2±0.3  | 10.9±13.9 | 0.32                |
| Triacylglycerole | TG(20:1_34:2) | 7.4±6.5  | 5.6±6.8  | 0.747 | 2±0.5    | 12.4±15.6 | 0.292               |
| Triacylglycerole | TG(20:1_34:3) | 1.6±1.4  | 1.2±1.4  | 0.748 | 0.4±0.1  | 3±4.2     | 0.309               |
| Triacylglycerole | TG(20:2_32:0) | 0.7±0.7  | 0.9±0.5  | 0.703 | 1±0.4    | 2.2±1.6   | 0.23                |
| Triacylglycerole | TG(20:2_32:1) | 0.8±0.6  | 0.8±0.8  | 0.955 | 0.5±0.2  | 1.5±1.7   | 0.335               |
| Triacylglycerole | TG(20:2_34:1) | 2.7±2.1  | 2.4±2    | 0.857 | 1.7±0.4  | 5.3±4.9   | 0.244               |
| Triacylglycerole | TG(20:2_34:2) | 2.3±2    | 1.8±2    | 0.743 | 1.5±0.5  | 4.9±5.3   | 0.302               |
| Triacylglycerole | TG(20:2_34:3) | 0.6±0.4  | 0.5±0.5  | 0.659 | 0.3±0.1  | 1.3±1.4   | 0.263               |
| Triacylglycerole | TG(20:2_34:4) | 0.1±0.1  | 0.1±0.1  | 0.649 | 0.1±0.1  | 0.1±0.1   | 0.442               |
| Triacylglycerole | TG(20:2_36:5) | 0.2±0.1  | 0.2±0.1  | 0.954 | 0.2±0.1  | 0.2±0.1   | 0.19                |
| Triacylglycerole | TG(20:3_32:0) | 1.4±0.6  | 2.3±1.4  | 0.325 | 1.7±0.5  | 3.4±1     | 0.036* <sup>§</sup> |
| Triacylglycerole | TG(20:3_32:1) | 1±0.6    | 1±0.8    | 0.968 | 0.5±0.2  | 1.8±1.5   | 0.174               |
| Triacylglycerole | TG(20:3_32:2) | 0.5±0.2  | 0.3±0.2  | 0.476 | 0.3±0.2  | 0.7±0.5   | 0.215               |
| Triacylglycerole | TG(20:3_34:0) | 0.7±0.5  | 0.9±0.6  | 0.71  | 0.7±0.2  | 1.4±0.8   | 0.194               |
| Triacylglycerole | TG(20:3_34:1) | 3.5±2.4  | 3.7±3    | 0.941 | 2.4±0.3  | 6.5±4.5   | 0.164               |
| Triacylglycerole | TG(20:3_34:2) | 2.9±2.1  | 2.6±2.6  | 0.894 | 2±0.5    | 5.9±4.5   | 0.187               |
| Triacylglycerole | TG(20:3_34:3) | 0.7±0.5  | 0.5±0.4  | 0.491 | 0.5±0.2  | 1.1±0.9   | 0.203               |
| Triacylglycerole | TG(20:3_36:3) | 2.8±2.2  | 2.1±2.1  | 0.71  | 1.8±0.1  | 4.9±3.6   | 0.186               |
| Triacylglycerole | TG(20:3_36:4) | 0.9±0.6  | 0.8±0.6  | 0.835 | 0.9±0.2  | 1.6±0.8   | 0.188               |
| Triacylglycerole | TG(20:3_36:5) | 0.1±0.1  | 0.2±0.1  | 0.583 | 0.1±0.1  | 0.2±0.1   | 0.036* <sup>§</sup> |
| Triacylglycerole | TG(20:4_30:0) | 1.4±0.3  | 2.8±1.4  | 0.13  | 1.5±0.3  | 2.1±0.3   | 0.021*              |
| Triacylglycerole | TG(20:4_32:0) | 7.4±1.7  | 14.6±8.1 | 0.181 | 8.8±1.8  | 13.2±0.8  | 0.007* <sup>§</sup> |
| Triacylglycerole | TG(20:4_32:1) | 2.1±1.2  | 3.2±2.1  | 0.452 | 1.9±0.8  | 4.1±3.1   | 0.261               |
| Triacylglycerole | TG(20:4_32:2) | 0.9±0.4  | 0.9±0.7  | 0.943 | 0.8±0.2  | 1.4±0.8   | 0.294               |
| Triacylglycerole | TG(20:4_33:2) | 0.2±0.1  | 0.2±0.1  | 0.934 | 0.2±0.1  | 0.3±0.1   | 0.334               |
| Triacylglycerole | TG(20:4_34:0) | 3.5±1.6  | 5.1±3    | 0.445 | 3.8±0.7  | 5.9±1.5   | 0.067               |
| Triacylglycerole | TG(20:4_34:1) | 10.5±5.9 | 12.7±9.3 | 0.735 | 10.1±2.3 | 17.6±9.4  | 0.227               |
| Triacylglycerole | TG(20:4_34:2) | 8.7±4.6  | 8.5±6.7  | 0.972 | 9.2±2.4  | 14.4±7.4  | 0.29                |
| Triacylglycerole | TG(20:4_34:3) | 1±0.6    | 1.2±1    | 0.853 | 1.2±0.4  | 1.8±1.2   | 0.366               |
| Triacylglycerole | TG(20:4_35:3) | 0.1±0.1  | 0.1±0.1  | 0.622 | 0.1±0.1  | 0.2±0.1   | 0.327               |
| Triacylglycerole | TG(20:4_36:2) | 8±5.1    | 7.1±5.5  | 0.831 | 7.3±1.4  | 12.4±7.1  | 0.269               |
| Triacylglycerole | TG(20:4_36:3) | 6.1±3.9  | 4.9±3.9  | 0.715 | 6.3±1.2  | 9.1±4.2   | 0.302               |
| Triacylglycerole | TG(20:4_36:4) | 4.1±1.3  | 3.8±2.5  | 0.854 | 4.9±1    | 4.6±1.6   | 0.778               |
| Triacylglycerole | TG(20:4_36:5) | 0.4±0.2  | 0.4±0.3  | 0.962 | 0.4±0.2  | 0.4±0.2   | 0.917               |
| Triacylglycerole | TG(20:5_34:0) | 0.2±0.1  | 0.2±0.1  | 0.82  | 0.2±0.1  | 0.2±0.1   | 0.428               |
| Triacylglycerole | TG(20:5_34:1) | 0.7±0.2  | 0.8±0.3  | 0.786 | 0.9±0.1  | 1.3±0.6   | 0.276               |

|                  |               |          |          |       |         |          |                     |
|------------------|---------------|----------|----------|-------|---------|----------|---------------------|
| Triacylglycerole | TG(20:5_34:2) | 0.4±0.2  | 0.4±0.2  | 0.912 | 0.4±0.1 | 0.9±0.7  | 0.275               |
| Triacylglycerole | TG(20:5_36:2) | 0.6±0.2  | 0.5±0.3  | 0.562 | 0.6±0.1 | 1±0.9    | 0.42                |
| Triacylglycerole | TG(20:5_36:3) | 0.4±0.2  | 0.4±0.3  | 0.758 | 0.4±0.1 | 0.9±0.8  | 0.243               |
| Triacylglycerole | TG(22:0_32:4) | 0.1±0.1  | 0.1±0.1  | 0.612 | 0.1±0.1 | 0.2±0.2  | 0.195               |
| Triacylglycerole | TG(22:2_32:4) | 0.2±0.2  | 0.2±0.2  | 0.649 | 0.2±0.1 | 0.5±0.3  | 0.129               |
| Triacylglycerole | TG(22:4_32:0) | 0.7±0.3  | 1.3±0.8  | 0.251 | 0.9±0.2 | 1.6±0.4  | 0.014* <sup>§</sup> |
| Triacylglycerole | TG(22:4_32:2) | 0.1±0.1  | 0.1±0.1  | 0.916 | 0.1±0.1 | 0.2±0.2  | 0.308               |
| Triacylglycerole | TG(22:4_34:2) | 1±0.7    | 1.1±1.1  | 0.902 | 1.1±0.3 | 2.2±1.1  | 0.126               |
| Triacylglycerole | TG(22:5_32:0) | 2.6±0.7  | 4.1±1.1  | 0.066 | 2.5±0.4 | 4.5±1.3  | 0.039* <sup>§</sup> |
| Triacylglycerole | TG(22:5_32:1) | 0.8±0.4  | 1.1±0.5  | 0.441 | 0.7±0.1 | 1.7±0.9  | 0.096               |
| Triacylglycerole | TG(22:5_34:1) | 2.9±1.7  | 3.1±1.6  | 0.864 | 2.6±0.3 | 4.9±2.3  | 0.125               |
| Triacylglycerole | TG(22:5_34:2) | 2.4±1    | 2.4±1.3  | 0.982 | 2.6±0.6 | 3.9±1.8  | 0.272               |
| Triacylglycerole | TG(22:5_34:3) | 0.3±0.2  | 0.5±0.3  | 0.372 | 0.5±0.2 | 0.8±0.4  | 0.243               |
| Triacylglycerole | TG(22:6_32:0) | 10.2±2.1 | 15.8±7.1 | 0.235 | 6.5±1.6 | 10.7±2   | 0.028* <sup>§</sup> |
| Triacylglycerole | TG(22:6_32:1) | 2.3±0.9  | 2.9±1.7  | 0.578 | 1.8±0.7 | 3.1±1.6  | 0.237               |
| Triacylglycerole | TG(22:6_34:1) | 8.4±3.7  | 10±5.6   | 0.691 | 7.5±2.3 | 10.2±2.9 | 0.241               |
| Triacylglycerole | TG(22:6_34:2) | 6.2±2.6  | 5.8±3.5  | 0.879 | 6.4±2.6 | 6.9±2.5  | 0.824               |
| Triacylglycerole | TG(22:6_34:3) | 0.7±0.2  | 0.8±0.5  | 0.867 | 0.8±0.3 | 0.9±0.4  | 0.539               |

## 9.2 High fat diet

| class          | Metabolite                              | WT HFD       | <i>Cndp1</i> -KO HFD | <i>p</i> (vs WT HFD) | WT HFD + STZ | <i>Cndp1</i> -KO HFD + STZ | <i>p</i> (vs WT HFD + STZ) |
|----------------|-----------------------------------------|--------------|----------------------|----------------------|--------------|----------------------------|----------------------------|
| Amino acid     | Alanine                                 | 390.2±181.5  | 542.1±79.9           | 0.118                | 568.4±87.0   | 591.9±105.7                | 0.71                       |
| Amino acid     | Arginine                                | 68.8±9.2     | 76.4±17.4            | 0.407                | 125.9±33.3   | 129.4±16.7                 | 0.841                      |
| Amino acid     | Asparagine                              | 99.8±27.1    | 86.6±23.3            | 0.428                | 87.8±19.0    | 104.4±19.7                 | 0.206                      |
| Amino acid     | Aspartic acid                           | 598.9±113.1  | 681.4±232.4          | 0.492                | 435.2±148.7  | 524.6±159.3                | 0.381                      |
| Amino acid     | Glutamine                               | 340.6±87.0   | 377.3±66.2           | 0.47                 | 376.3±43.3   | 427.7±102.5                | 0.326                      |
| Amino acid     | Glutamate                               | 1426.8±192.5 | 1968.7±269.3         | 0.005*               | 1878.8±281.1 | 1984.1±246.0               | 0.543                      |
| Amino acid     | Glycine                                 | 1729.5±271.5 | 2150.5±354.5         | 0.062                | 2040.3±333.7 | 1938.2±434.1               | 0.686                      |
| Amino acid     | Histidine                               | 81.4±11.1    | 97.1±24.0            | 0.215                | 106.7±21.6   | 109.0±28.1                 | 0.888                      |
| Amino acid     | Isoleucine                              | 56.9±9.3     | 74.0±21.6            | 0.135                | 87.6±19.8    | 87.5±14.1                  | 0.995                      |
| Amino acid     | Leucine                                 | 49.3±49.4    | 135.7±29.4           | 0.008*               | 182.2±43.8   | 173.6±28.0                 | 0.72                       |
| Amino acid     | Lysine                                  | 99.2±13.7    | 120.5±21.0           | 0.088                | 100.6±11.0   | 101.5±15.7                 | 0.918                      |
| Amino acid     | Methionine                              | 47.5±6.7     | 62.6±12.0            | 0.034*               | 67.9±10.3    | 80.7±27.7                  | 0.356                      |
| Amino acid     | Phenylalanine                           | 54.8±8.5     | 66.9±18.6            | 0.215                | 69.2±12.1    | 71.3±11.9                  | 0.793                      |
| Amino acid     | Proline                                 | 69.8±11.3    | 80.7±18.4            | 0.282                | 100.4±23.6   | 109.2±17.3                 | 0.514                      |
| Amino acid     | Serine                                  | 402.9±190.0  | 588.9±121.9          | 0.096                | 519.6±77.9   | 575.4±99.1                 | 0.346                      |
| Amino acid     | Tyrosine                                | 65.1±10.5    | 80.5±24.5            | 0.227                | 85.1±15.1    | 89.9±18.0                  | 0.659                      |
| Amino acid     | Valine                                  | 114.3±22.2   | 130.5±64.6           | 0.606                | 165.6±33.3   | 161.9±23.5                 | 0.844                      |
| Acylcarnitines | L-Carnitine                             | 234.8±22.4   | 255.5±40.8           | 0.469                | 221.8±27.9   | 288.5±37.3                 | 0.048*                     |
| Acylcarnitines | L-Acetylcarnitine                       | 55.2±7.9     | 63.8±8.2             | 0.24                 | 69.9±12      | 77.5±24.8                  | 0.647                      |
| Acylcarnitines | Propionylcarnitine                      | 2.3±0.5      | 2.4±0.3              | 0.627                | 2.8±1.3      | 3.4±1.4                    | 0.606                      |
| Acylcarnitines | Malonylcarnitine                        | 0.6±0.1      | 0.7±0.2              | 0.199                | 1.6±0.7      | 1.6±0.8                    | 0.886                      |
| Acylcarnitines | Butyrylcarnitine                        | 2.9±0.4      | 3.8±0.2              | 0.01*                | 4.6±1.3      | 5.9±1.7                    | 0.326                      |
| Acylcarnitines | Butenylcarnitine                        | 0.1±0.1      | 0.1±0.1              | 0.809                | 0.1±0.1      | 0.2±0.1                    | 0.304                      |
| Acylcarnitines | 2-Methylbutyroylcarnitine               | 0.3±0.1      | 0.3±0.2              | 0.829                | 0.5±0.3      | 0.5±0.4                    | 0.746                      |
| Acylcarnitines | Glutaryl carnitine                      | 0.4±0.1      | 0.4±0.1              | 0.91                 | 0.6±0.1      | 0.5±0.1                    | 0.191                      |
| Acylcarnitines | 3-Methylglutaryl carnitine              | 0.2±0.1      | 0.2±0.1              | 0.507                | 0.2±0.1      | 0.2±0.1                    | 0.653                      |
| Acylcarnitines | Methylmalonylcarnitine                  | 0.9±0.2      | 0.9±0.2              | 0.776                | 1.1±0.3      | 1.2±0.2                    | 0.579                      |
| Acylcarnitines | Glutaconylcarnitine                     | 0.1±0.1      | 0.1±0.1              | 0.791                | 0.1±0.1      | 0.1±0.1                    | 0.201                      |
| Acylcarnitines | Hexanoylcarnitine                       | 0.9±0.2      | 1.1±0.2              | 0.147                | 1±0.3        | 1.2±0.2                    | 0.359                      |
| Acylcarnitines | L-Octanoylcarnitine                     | 0.2±0.2      | 0.3±0.2              | 0.503                | 0.3±0.2      | 0.6±0.1                    | 0.021* <sup>§</sup>        |
| Acylcarnitines | Nonanoylcarnitine                       | 0.1±0.1      | 0.1±0.1              | 0.643                | 0.1±0.1      | 0.2±0.1                    | 0.303                      |
| Acylcarnitines | Dodecanoylcarnitine                     | 1.2±0.2      | 2±0.5                | 0.026* <sup>§</sup>  | 2.1±1        | 2.2±0.5                    | 0.912                      |
| Acylcarnitines | Tetradecanoylcarnitine                  | 2.7±0.4      | 3.7±0.6              | 0.046*               | 4±1.6        | 4.7±0.9                    | 0.502                      |
| Acylcarnitines | cis-5-Tetradecenoylcarnitine            | 0.3±0.1      | 0.4±0.1              | 0.341                | 0.3±0.1      | 0.4±0.1                    | 0.268                      |
| Acylcarnitines | 3-Hydroxy-cis-5-tetradecenoylcarnitine  | 0.1±0.1      | 0.2±0.1              | 0.144                | 0.2±0.1      | 0.2±0.1                    | 0.077                      |
| Acylcarnitines | O-(hydroxytetradecadienoyl)-L-carnitine | 0.1±0.1      | 0.1±0.1              | 0.315                | 0.1±0.1      | 0.1±0.1                    | 0.031* <sup>§</sup>        |

|                    |                                     |              |              |                     |              |               |                     |
|--------------------|-------------------------------------|--------------|--------------|---------------------|--------------|---------------|---------------------|
| Acylcarnitines     | L-Palmitoylcarnitine                | 7.4±0.9      | 8.8±0.8      | 0.079               | 8±2.3        | 9.6±1.6       | 0.361               |
| Acylcarnitines     | 3-Hydroxyhexadecanoylcarnitine      | 0.3±0.1      | 0.3±0.1      | 0.532               | 0.3±0.1      | 0.4±0.1       | 0.02* <sup>§</sup>  |
| Acylcarnitines     | 9-Hexadecenoylcarnitine             | 0.7±0.1      | 0.9±0.2      | 0.042*              | 0.7±0.2      | 0.7±0.2       | 0.895               |
| Acylcarnitines     | 3-Hydroxy-9-hexadecenoylcarnitine   | 0.1±0.1      | 0.1±0.1      | 0.621               | 0.1±0.1      | 0.1±0.1       | 0.81                |
| Acylcarnitines     | 9,12-Hexadecadienoylcarnitine       | 0.3±0.1      | 0.3±0.1      | 0.545               | 0.3±0.1      | 0.4±0.1       | 0.096               |
| Acylcarnitines     | Stearoylcarnitine                   | 3.9±0.4      | 4.4±0.6      | 0.177               | 3.9±0.8      | 4.5±0.8       | 0.35                |
| Acylcarnitines     | Oleoylecarnitine                    | 2.5±0.3      | 3.1±0.3      | 0.033*              | 3±0.8        | 2.8±0.5       | 0.654               |
| Acylcarnitines     | 3-Hydroxy-11Z-octadecenoylcarnitine | 0.3±0.1      | 0.3±0.1      | 0.475               | 0.3±0.1      | 0.4±0.1       | 0.044*              |
| Acylcarnitines     | Linoleyl carnitine                  | 1±0.2        | 1.3±0.2      | 0.015*              | 1.4±0.5      | 1.6±0.4       | 0.46                |
| Amino acid related | 1-Methylhistidine                   | 23.4±9.4     | 18.8±2.4     | 0.44                | 34.7±6.2     | 28.5±5.1      | 0.223               |
| Amino acid related | 3-Methylhistidine                   | 4.2±1.1      | 1.4±0.1      | 0.004* <sup>§</sup> | 4.1±0.9      | 1.4±0.3       | 0.003* <sup>§</sup> |
| Amino acid related | 5-Aminopentanoic acid               | 0.8±0.4      | 1±0.2        | 0.299               | 1.1±0.4      | 1.6±0.7       | 0.298               |
| Amino acid related | L-alpha-Aminobutyric acid           | 34.7±9.2     | 29.6±11.1    | 0.562               | 40.6±18.7    | 40.9±11.7     | 0.987               |
| Amino acid related | Asymmetric dimethylarginine         | 4.7±0.5      | 4.8±2.3      | 0.966               | 6.8±3.3      | 5.2±3.4       | 0.566               |
| Amino acid related | Aminoadipic acid                    | 24.5±13.2    | 24.5±10.5    | 0.999               | 25.5±8       | 45±27.5       | 0.282               |
| Amino acid related | 3-Aminobutanoic acid                | 4.9±1.3      | 4.4±2.9      | 0.794               | 26.4±20.3    | 28.9±22.7     | 0.89                |
| Amino acid related | Betaine                             | 1384.5±473.5 | 1336.3±357.3 | 0.893               | 2272±784.7   | 2872.8±1569.5 | 0.575               |
| Amino acid related | Citrulline                          | 25.4±6.6     | 24.4±3.6     | 0.824               | 34±4.1       | 34.6±7.9      | 0.914               |
| Amino acid related | Creatinine                          | 34.4±11.7    | 38.4±2.8     | 0.587               | 71.8±86.8    | 28.3±9.6      | 0.421               |
| Amino acid related | Cystine                             | 427.5±135.6  | 443.9±496.8  | 0.958               | 777±282      | 895.3±670.3   | 0.788               |
| Amino acid related | Homo-L-arginine                     | 0.3±0.1      | 0.3±0.1      | 0.899               | 0.3±0.1      | 0.4±0.3       | 0.374               |
| Amino acid related | Homocysteine                        | 46.3±12.6    | 65.9±18      | 0.171               | 54.9±18.2    | 46.4±9.8      | 0.506               |
| Amino acid related | Ornithine                           | 14.5±4.9     | 18.1±5.3     | 0.408               | 24.8±3       | 31±8.3        | 0.267               |
| Amino acid related | Phenylacetyl glycine                | 16.8±4.8     | 25.3±11.5    | 0.282               | 49.9±60.6    | 15.3±6.3      | 0.363               |
| Amino acid related | L-phenylalanine betaine             | 0.1±0.1      | 0.1±0.1      | 0.191               | 0.1±0.1      | 0.1±0.1       | 0.671               |
| Amino acid related | Proline betaine                     | 1.7±0.3      | 2.2±0.3      | 0.088               | 1.8±0.3      | 1.5±0.2       | 0.05*               |
| Amino acid related | Sarcosine                           | 1.3±0.3      | 1.4±0.5      | 0.802               | 4±1.3        | 4.4±1.3       | 0.748               |
| Amino acid related | Symmetric dimethylarginine          | 0.9±0.2      | 0.9±0.3      | 0.988               | 1.2±1.2      | 0.7±0.2       | 0.516               |
| Amino acid related | 4-Hydroxyproline                    | 28.2±4.9     | 26.9±4.8     | 0.753               | 30.2±7.7     | 33.2±9.5      | 0.68                |
| Amino acid related | Taurine                             | 3041.8±199.8 | 3232.5±334.6 | 0.43                | 3317.8±141.5 | 3116.8±162.8  | 0.158               |
| Bile acids         | Cholic acid                         | 0.1±0.1      | 0.1±0.1      | 0.792               | 1.1±0.8      | 2.1±3         | 0.591               |
| Bile acids         | Deoxycholic acid                    | 0.2±0.1      | 0.2±0.2      | 0.974               | 0.4±0.3      | 0.7±0.4       | 0.344               |
| Bile acids         | Taurocholic acid                    | 2.9±2.9      | 2.6±3.6      | 0.909               | 8.5±2.6      | 7.5±3.6       | 0.707               |
| Bile acids         | Taurochenodesoxycholic acid         | 0.1±0.1      | 0.1±0.1      | 0.846               | 0.3±0.1      | 0.2±0.1       | 0.496               |
| Bile acids         | Taurodeoxycholic acid               | 0.3±0.2      | 0.2±0.2      | 0.52                | 0.3±0.2      | 0.5±0.2       | 0.195               |
| Bile acids         | Tauro-b-muricholic acid             | 0.8±0.8      | 1.8±2.4      | 0.492               | 4.9±3.8      | 1.5±1.2       | 0.193               |
| biogenic amines    | beta-Alanine                        | 30.3±2.7     | 25.3±4       | 0.118               | 88.5±44.6    | 49.1±9.5      | 0.185               |
| biogenic amines    | gamma-Aminobutyric acid             | 60.6±5.2     | 72.8±12.4    | 0.167               | 42.1±12.3    | 46.3±17.9     | 0.746               |
| biogenic amines    | Histamine                           | 3.5±1.5      | 4.5±1.1      | 0.389               | 0.7±0.4      | 2.4±3         | 0.383               |



|                    |                        |             |            |         |                |                |       |
|--------------------|------------------------|-------------|------------|---------|----------------|----------------|-------|
| biogenic amines    | Putrescine             | 8.6±2.1     | 7.9±1.9    | 0.693   | 8.7±3.2        | 8.5±2.4        | 0.918 |
| biogenic amines    | Serotonin              | 2.1±1.1     | 2.3±0.5    | 0.766   | 1.5±0.9        | 2.3±1.1        | 0.385 |
| biogenic amines    | Spermidine             | 8.3±1.3     | 9.8±0.8    | 0.13    | 11±0.9         | 13±4           | 0.423 |
| biogenic amines    | Spermine               | 4.6±1.1     | 5.8±2      | 0.369   | 4.3±1.8        | 6.7±4.9        | 0.465 |
| Carboxylic acids   | cis-Aconitic acid      | 1±0.4       | 1.1±0.4    | 0.673   | 1.9±1.4        | 1.2±0.4        | 0.434 |
| Carboxylic acids   | Dodecanedioic acid     | 1.6±0.6     | 1.9±0.8    | 0.568   | 1.9±0.3        | 2.1±0.4        | 0.363 |
| Carboxylic acids   | Hippuric acid          | 0.2±0.1     | 0.6±0.5    | 0.213   | 0.8±0.7        | 0.8±0.6        | 0.962 |
| Carboxylic acids   | L-Lactic acid          | 9468±2401.4 | 11119±2073 | 0.403   | 15067.8±2048.1 | 16941.3±2589.4 | 0.364 |
| Carboxylic acids   | 3-Hydroxyglutaric acid | 15.3±3.1    | 18.5±4.1   | 0.305   | 11.4±2.8       | 18.6±6.6       | 0.13  |
| Carboxylic acids   | Succinic acid          | 115.1±15    | 140.2±28.1 | 0.221   | 170.5±30.8     | 229±120.8      | 0.448 |
| Ceramides          | Cer(d16:1/22:0)        | 0.3±0.1     | 0.3±0.1    | 0.537   | 0.3±0.1        | 0.4±0.1        | 0.75  |
| Ceramides          | Cer(d16:1/24:0)        | 0.4±0.1     | 0.4±0.1    | 0.947   | 0.4±0.1        | 0.4±0.2        | 0.657 |
| Ceramides          | Cer(d18:1/14:0)        | 0.7±0.2     | 0.7±0.1    | 0.984   | 0.8±0.2        | 0.8±0.2        | 0.943 |
| Ceramides          | Cer(d18:1/16:0)        | 5.7±1       | 6.2±0.5    | 0.417   | 7±1.8          | 7±1            | 0.972 |
| Ceramides          | Cer(d18:1/18:0(OH))    | 0.4±0.2     | 0.5±0.1    | 0.649   | 0.5±0.2        | 0.7±0.2        | 0.288 |
| Ceramides          | Cer(d18:1/18:0)        | 1.1±0.1     | 1.4±0.3    | 0.071   | 1.3±0.3        | 1.2±0.3        | 0.871 |
| Ceramides          | Cer(d18:1/18:1)        | 0.2±0.1     | 0.2±0.1    | 0.088   | 0.2±0.1        | 0.2±0.1        | 0.163 |
| Ceramides          | Cer(d18:1/20:0(OH))    | 27.7±2.8    | 30.9±2.6   | 0.201   | 40.1±4.2       | 38.2±8.8       | 0.749 |
| Ceramides          | Cer(d18:1/20:0)        | 1.2±0.1     | 1.4±0.1    | 0.071   | 1.5±0.2        | 1.4±0.3        | 0.876 |
| Ceramides          | Cer(d18:1/22:0)        | 8.7±0.6     | 9.5±0.6    | 0.143   | 10.2±1.4       | 10.9±1.4       | 0.564 |
| Ceramides          | Cer(d18:1/23:0)        | 3.1±0.5     | 3.3±0.4    | 0.581   | 3.7±0.5        | 3.8±0.4        | 0.638 |
| Ceramides          | Cer(d18:1/24:0)        | 19±1.2      | 20.7±1.7   | 0.21    | 18.2±2.9       | 21.8±2.5       | 0.146 |
| Ceramides          | Cer(d18:1/24:1)        | 9±0.7       | 9.8±0.5    | 0.117   | 10.7±1.6       | 9.8±1          | 0.454 |
| Ceramides          | Cer(d18:1/25:0)        | 1±0.2       | 1.1±0.2    | 0.692   | 1.3±0.3        | 1.3±0.3        | 0.766 |
| Ceramides          | Cer(d18:1/26:0)        | 0.2±0.1     | 0.3±0.1    | 0.003*§ | 0.2±0.1        | 0.2±0.1        | 0.163 |
| Ceramides          | Cer(d18:1/26:1)        | 0.2±0.1     | 0.2±0.1    | 0.334   | 0.2±0.1        | 0.2±0.1        | 0.44  |
| Ceramides          | Cer(d18:2/14:0)        | 0.1±0.1     | 0.1±0.1    | 0.78    | 0.1±0.1        | 0.1±0.1        | 0.548 |
| Ceramides          | Cer(d18:2/16:0)        | 3.8±0.7     | 3.8±0.6    | 0.989   | 5.3±1.8        | 4.8±1.2        | 0.715 |
| Ceramides          | Cer(d18:2/18:0)        | 0.4±0.1     | 0.4±0.1    | 0.426   | 0.4±0.2        | 0.4±0.1        | 0.973 |
| Ceramides          | Cer(d18:2/20:0)        | 0.4±0.1     | 0.4±0.1    | 0.961   | 0.4±0.1        | 0.4±0.1        | 0.819 |
| Ceramides          | Cer(d18:2/22:0)        | 7.5±1.1     | 6.9±0.4    | 0.382   | 8.4±2.3        | 8.1±1.4        | 0.885 |
| Ceramides          | Cer(d18:2/23:0)        | 0.8±0.2     | 0.7±0.1    | 0.52    | 1±0.3          | 1±0.1          | 0.764 |
| Ceramides          | Cer(d18:2/24:0)        | 20.9±2.2    | 21±2.6     | 0.951   | 20.8±4.7       | 22±1.2         | 0.68  |
| Ceramides          | Cer(d18:2/24:1)        | 5.6±0.9     | 5.6±0.4    | 0.901   | 7.5±2          | 6.3±0.7        | 0.331 |
| Cholesteryl esters | CE(14:0)               | 2.5±1.5     | 3.7±1.3    | 0.345   | 5.8±3.7        | 6.1±3.4        | 0.924 |
| Cholesteryl esters | CE(15:1)               | 1.9±1.1     | 2±0.9      | 0.892   | 2.7±2.5        | 4.2±0.9        | 0.361 |
| Cholesteryl esters | CE(16:1)               | 1.7±0.6     | 3±0.9      | 0.066   | 1.8±1.3        | 0.9±0.5        | 0.307 |
| Cholesteryl esters | CE(18:1)               | 3.2±1.1     | 4.4±0.4    | 0.119   | 8.1±5          | 4.5±1          | 0.269 |
| Cholesteryl esters | CE(18:2)               | 28.4±16.7   | 53±21.1    | 0.164   | 54.4±30.6      | 55.2±33.4      | 0.979 |

|                          |                             |             |             |         |             |             |        |
|--------------------------|-----------------------------|-------------|-------------|---------|-------------|-------------|--------|
| Cholesteryl esters       | CE(18:3)                    | 1.2±0.7     | 2.1±1.3     | 0.322   | 1.6±1.1     | 1.6±0.7     | 0.943  |
| Cholesteryl esters       | CE(20:3)                    | 1±0.5       | 1.6±1.1     | 0.343   | 1.7±0.9     | 1.3±0.5     | 0.472  |
| Cholesteryl esters       | CE(20:4)                    | 36.4±22.2   | 57.7±19.6   | 0.258   | 41.2±20.5   | 56.5±30.4   | 0.497  |
| Cholesteryl esters       | CE(20:5)                    | 2±0.7       | 2.9±1.1     | 0.278   | 1.9±1.2     | 2.2±0.4     | 0.656  |
| Cholesteryl esters       | CE(22:5)                    | 0.6±0.3     | 0.9±0.2     | 0.155   | 1.1±0.4     | 1±0.5       | 0.878  |
| Cholesteryl esters       | CE(22:6)                    | 9.3±4       | 12.5±3.6    | 0.339   | 12.6±7.3    | 14.8±6.3    | 0.711  |
| Diacylglyceroles         | DG(14:0_18:1)               | 4.2±0.6     | 5.2±1.3     | 0.239   | 6.1±3.4     | 6.6±3.1     | 0.867  |
| Diacylglyceroles         | DG(14:0_18:2)               | 4.4±1.1     | 5.3±1.4     | 0.386   | 8.5±5.8     | 9.1±4.2     | 0.886  |
| Diacylglyceroles         | DG(14:1_18:1)               | 0.3±0.2     | 0.6±0.1     | 0.011*§ | 0.4±0.2     | 0.6±0.3     | 0.248  |
| Diacylglyceroles         | DG(16:0_16:1)               | 4.4±0.7     | 4.9±0.4     | 0.272   | 3.9±2.5     | 3.7±1.2     | 0.917  |
| Diacylglyceroles         | DG(16:0_18:1)               | 19.2±2.8    | 24.2±7.1    | 0.298   | 26.5±14.5   | 26.2±7      | 0.97   |
| Diacylglyceroles         | DG(16:0_18:2)               | 15.5±2.3    | 19.8±6.6    | 0.33    | 25.3±16.8   | 24.8±7.5    | 0.964  |
| Diacylglyceroles         | DG(16:0_20:3)               | 0.4±0.1     | 0.4±0.1     | 0.411   | 0.5±0.2     | 0.5±0.2     | 0.836  |
| Diacylglyceroles         | DG(16:0_20:4)               | 1.2±0.3     | 1.3±0.2     | 0.653   | 1.2±0.4     | 1.6±0.4     | 0.179  |
| Diacylglyceroles         | DG(16:1_18:0)               | 0.4±0.2     | 0.5±0.2     | 0.268   | 0.3±0.3     | 0.3±0.2     | 0.625  |
| Diacylglyceroles         | DG(16:1_18:2)               | 3.5±0.4     | 4.5±0.8     | 0.081   | 4.3±3.1     | 3.3±1.5     | 0.628  |
| Diacylglyceroles         | DG(17:0_18:1)               | 4±0.7       | 5±1.4       | 0.271   | 4.6±1.2     | 5.2±0.7     | 0.513  |
| Diacylglyceroles         | DG(18:0_20:4)               | 4.7±0.7     | 6.4±1       | 0.043*§ | 5.2±0.8     | 6.5±0.7     | 0.062  |
| Diacylglyceroles         | DG(18:1_18:1)               | 5.8±0.5     | 8.4±1.2     | 0.009*§ | 8±4.1       | 7.5±3.4     | 0.866  |
| Diacylglyceroles         | DG(18:1_18:2)               | 17.6±1.4    | 24.9±3      | 0.009*§ | 34.6±23.7   | 29.2±12.2   | 0.741  |
| Diacylglyceroles         | DG(18:1_18:3)               | 1.4±0.5     | 2.2±0.6     | 0.125   | 2.1±1.5     | 1.9±0.8     | 0.838  |
| Diacylglyceroles         | DG(18:1_20:0)               | 0.7±0.1     | 0.8±0.2     | 0.137   | 0.8±0.2     | 0.9±0.5     | 0.857  |
| Diacylglyceroles         | DG(18:1_20:1)               | 0.2±0.1     | 0.2±0.1     | 0.218   | 0.3±0.2     | 0.2±0.1     | 0.683  |
| Diacylglyceroles         | DG(18:1_20:2)               | 0.2±0.1     | 0.2±0.1     | 0.871   | 0.3±0.2     | 0.3±0.1     | 0.943  |
| Diacylglyceroles         | DG(18:1_20:4)               | 1.5±0.2     | 1.7±0.2     | 0.208   | 1.8±0.2     | 1.7±0.5     | 0.94   |
| Diacylglyceroles         | DG(18:2_18:2)               | 15.9±2.8    | 18.5±2      | 0.225   | 44.3±38.5   | 32±12.7     | 0.619  |
| Diacylglyceroles         | DG(18:2_20:4)               | 0.8±0.1     | 1±0.1       | 0.035*§ | 1.1±0.5     | 1.3±0.4     | 0.456  |
| Dihydroceramides         | Cer(d18:0/18:0(OH))         | 4.7±3.3     | 7.7±1.2     | 0.18    | 4.3±3.9     | 4.7±1.5     | 0.882  |
| Dihydroceramides         | Cer(d18:0/22:0)             | 0.6±0.1     | 0.7±0.2     | 0.484   | 0.5±0.2     | 0.7±0.1     | 0.048* |
| Dihydroceramides         | Cer(d18:0/24:0)             | 0.9±0.3     | 1.1±0.2     | 0.113   | 0.7±0.2     | 1±0.3       | 0.073  |
| Dihydroceramides         | Cer(d18:0/24:1)             | 0.5±0.1     | 0.6±0.2     | 0.322   | 0.5±0.1     | 0.5±0.2     | 0.934  |
| Fatty acids              | Arachidonic acid            | 363.8±101.5 | 356.5±116.2 | 0.938   | 374.5±168.4 | 396.3±157.8 | 0.876  |
| Fatty acids              | Docosahexaenoic acid        | 211.5±61.6  | 185±65.9    | 0.629   | 223.3±122   | 281±87.3    | 0.53   |
| Fatty acids              | Eicosapentaenoic acid       | 9.3±3.7     | 9.1±3       | 0.928   | 13.3±7.4    | 16.2±7.9    | 0.655  |
| Fatty acids              | Elaidic acid                | 94.3±19.9   | 107.1±29.6  | 0.555   | 204.5±86    | 127.5±48.9  | 0.226  |
| Fatty acids              | Linoleic acid               | 232.8±97.7  | 286.5±44.8  | 0.42    | 524±277.6   | 476.3±170.7 | 0.809  |
| Fatty acids              | Eicosadienoic acid          | 3.2±0.7     | 3.1±0.4     | 0.852   | 7.3±3.7     | 5.5±1.7     | 0.47   |
| Fatty acids              | Dihomo-gamma-linolenic acid | 14.2±4.4    | 16.3±2      | 0.468   | 21.7±5.3    | 18.1±5.7    | 0.449  |
| Lysophosphatidylcholines | lysoPC a C14:0              | 4.4±0.9     | 4.9±1.2     | 0.527   | 9.5±5.2     | 10.2±4.2    | 0.856  |

|                                 |                |              |              |        |              |              |        |
|---------------------------------|----------------|--------------|--------------|--------|--------------|--------------|--------|
| <b>Lysophosphatidylcholines</b> | lysoPC a C16:0 | 158±13.4     | 170±15.8     | 0.354  | 191.8±58.2   | 218.8±39.3   | 0.53   |
| <b>Lysophosphatidylcholines</b> | lysoPC a C16:1 | 3±0.5        | 3.4±0.4      | 0.258  | 4.1±2.5      | 3.2±1.3      | 0.609  |
| <b>Lysophosphatidylcholines</b> | lysoPC a C17:0 | 2±0.4        | 2±0.3        | 0.819  | 1.9±0.2      | 2.2±0.3      | 0.078  |
| <b>Lysophosphatidylcholines</b> | lysoPC a C18:0 | 131.5±6.3    | 139.5±7.5    | 0.205  | 99±10.1      | 136.3±20.9   | 0.032* |
| <b>Lysophosphatidylcholines</b> | lysoPC a C18:1 | 32.9±5.4     | 34.5±6.9     | 0.77   | 71.1±43.2    | 69±34        | 0.949  |
| <b>Lysophosphatidylcholines</b> | lysoPC a C18:2 | 43.1±9.5     | 48.6±16.5    | 0.63   | 150.6±131    | 146±73.3     | 0.96   |
| <b>Lysophosphatidylcholines</b> | lysoPC a C20:3 | 4.8±1.3      | 5±2.2        | 0.899  | 14±10.9      | 10.7±6.5     | 0.664  |
| <b>Lysophosphatidylcholines</b> | lysoPC a C20:4 | 66.2±13.5    | 58.3±19.8    | 0.591  | 128.3±73.4   | 137.7±76.6   | 0.884  |
| <b>Lysophosphatidylcholines</b> | lysoPC a C24:0 | 1.7±0.2      | 2±0.3        | 0.077  | 2±0.5        | 1.6±0.4      | 0.265  |
| <b>Lysophosphatidylcholines</b> | lysoPC a C26:0 | 2.1±0.6      | 2±0.4        | 0.755  | 2.8±1.2      | 2.4±0.5      | 0.615  |
| <b>Lysophosphatidylcholines</b> | lysoPC a C26:1 | 1.1±0.2      | 0.9±0.1      | 0.074  | 1±0.3        | 0.9±0.1      | 0.378  |
| <b>Lysophosphatidylcholines</b> | lysoPC a C28:0 | 17.1±1.8     | 14.4±2.4     | 0.161  | 34.7±5.7     | 37.2±10.4    | 0.723  |
| <b>Lysophosphatidylcholines</b> | lysoPC a C28:1 | 2.6±0.3      | 2.9±0.5      | 0.383  | 2.8±0.7      | 2.8±0.3      | 0.967  |
| <b>Phosphatidylcholines</b>     | PC aa C24:0    | 0.7±0.1      | 0.8±0.1      | 0.117  | 0.8±0.3      | 1.1±0.2      | 0.244  |
| <b>Phosphatidylcholines</b>     | PC aa C26:0    | 4.1±0.8      | 4.5±0.6      | 0.453  | 5±1.1        | 6±0.9        | 0.222  |
| <b>Phosphatidylcholines</b>     | PC aa C28:1    | 13.2±1.3     | 12.8±0.7     | 0.644  | 12.8±1.8     | 15±1.6       | 0.162  |
| <b>Phosphatidylcholines</b>     | PC aa C30:0    | 169±14.2     | 187.3±23.9   | 0.299  | 199.8±14.2   | 220±24.9     | 0.266  |
| <b>Phosphatidylcholines</b>     | PC aa C30:2    | 0.6±0.3      | 0.4±0.2      | 0.519  | 0.8±0.2      | 0.5±0.2      | 0.122  |
| <b>Phosphatidylcholines</b>     | PC aa C32:0    | 1917.3±102.8 | 2042.5±151.3 | 0.281  | 1791.8±265.8 | 2027.5±108.7 | 0.205  |
| <b>Phosphatidylcholines</b>     | PC aa C32:1    | 235.8±24.7   | 269±36.5     | 0.239  | 178.3±14.7   | 169.3±26.9   | 0.629  |
| <b>Phosphatidylcholines</b>     | PC aa C32:2    | 52.9±6.2     | 63.6±7.8     | 0.112  | 67.8±3.1     | 80.7±15.9    | 0.216  |
| <b>Phosphatidylcholines</b>     | PC aa C32:3    | 4±0.5        | 4.8±0.5      | 0.084  | 4.6±0.7      | 5.3±1.2      | 0.394  |
| <b>Phosphatidylcholines</b>     | PC aa C34:1    | 1488.8±81.1  | 1624.3±36.5  | 0.039* | 1314.5±105.1 | 1438.3±139.6 | 0.266  |
| <b>Phosphatidylcholines</b>     | PC aa C34:2    | 1290.3±124   | 1420.8±150.6 | 0.291  | 1645.5±240.8 | 1823±187.8   | 0.353  |
| <b>Phosphatidylcholines</b>     | PC aa C34:3    | 69.8±6.9     | 80.1±8.8     | 0.158  | 62.2±1.3     | 68±10.9      | 0.395  |
| <b>Phosphatidylcholines</b>     | PC aa C34:4    | 28.8±3.2     | 33.1±3.2     | 0.153  | 31.1±2.8     | 35±5.8       | 0.333  |
| <b>Phosphatidylcholines</b>     | PC aa C36:0    | 62±1.5       | 62±5.6       | 0.995  | 56.3±10.2    | 57.6±5.5     | 0.855  |
| <b>Phosphatidylcholines</b>     | PC aa C36:1    | 514±51.6     | 568.5±27     | 0.156  | 449.8±53.1   | 541.3±66.6   | 0.112  |
| <b>Phosphatidylcholines</b>     | PC aa C36:2    | 967.5±110    | 1078.8±99.7  | 0.242  | 1044.8±51.1  | 1234.3±138.8 | 0.069  |
| <b>Phosphatidylcholines</b>     | PC aa C36:3    | 432.5±50.7   | 485.5±31.7   | 0.176  | 510±19.8     | 555.5±62.8   | 0.277  |
| <b>Phosphatidylcholines</b>     | PC aa C36:4    | 2069.8±130.2 | 2191±152.4   | 0.336  | 1636±184.1   | 2019.3±149.5 | 0.032* |
| <b>Phosphatidylcholines</b>     | PC aa C36:5    | 69.3±4.2     | 71.5±3       | 0.468  | 50.7±6.7     | 63.5±6.6     | 0.056  |
| <b>Phosphatidylcholines</b>     | PC aa C36:6    | 47.1±5       | 51.1±1.5     | 0.226  | 49.5±11.1    | 59.6±7.7     | 0.242  |
| <b>Phosphatidylcholines</b>     | PC aa C38:0    | 334.8±30     | 322.8±8.6    | 0.529  | 275.3±48.2   | 252.3±55.1   | 0.606  |
| <b>Phosphatidylcholines</b>     | PC aa C38:1    | 121±11.4     | 116.3±3.6    | 0.515  | 95.9±17.7    | 98.3±17.9    | 0.876  |
| <b>Phosphatidylcholines</b>     | PC aa C38:3    | 154.5±16.7   | 173.5±27.7   | 0.348  | 142.3±19.8   | 145.8±13.5   | 0.808  |
| <b>Phosphatidylcholines</b>     | PC aa C38:4    | 1550.8±149.1 | 1626.8±88.1  | 0.476  | 1085±151.8   | 1365±185.1   | 0.09   |
| <b>Phosphatidylcholines</b>     | PC aa C38:5    | 559±46       | 614.8±15.5   | 0.094  | 433±62.7     | 498±60.1     | 0.243  |
| <b>Phosphatidylcholines</b>     | PC aa C38:6    | 2087.5±78.9  | 2169.3±142.8 | 0.419  | 1652.8±417.8 | 2370.8±162.1 | 0.033* |

|                      |             |            |             |       |              |             |        |
|----------------------|-------------|------------|-------------|-------|--------------|-------------|--------|
| Phosphatidylcholines | PC aa C40:1 | 3.5±0.3    | 4.2±1.2     | 0.347 | 3.8±0.6      | 3.2±0.3     | 0.121  |
| Phosphatidylcholines | PC aa C40:2 | 4.3±0.5    | 6.4±2       | 0.113 | 5.3±0.7      | 4.7±0.7     | 0.275  |
| Phosphatidylcholines | PC aa C40:3 | 4.9±0.4    | 5.1±0.5     | 0.46  | 6.1±0.8      | 5.1±0.7     | 0.117  |
| Phosphatidylcholines | PC aa C40:4 | 26.3±3.6   | 31.1±1.8    | 0.079 | 27.2±3.3     | 29.4±3.4    | 0.448  |
| Phosphatidylcholines | PC aa C40:5 | 55.5±5.9   | 60.8±1.3    | 0.172 | 47.1±9.1     | 50.1±6.4    | 0.658  |
| Phosphatidylcholines | PC aa C40:6 | 398±6.8    | 426.8±21.1  | 0.065 | 271±40.6     | 368±39.2    | 0.025* |
| Phosphatidylcholines | PC aa C42:0 | 1±0.2      | 1.2±0.2     | 0.128 | 0.8±0.3      | 0.7±0.3     | 0.466  |
| Phosphatidylcholines | PC aa C42:1 | 1.4±0.2    | 1.5±0.3     | 0.306 | 1.1±0.2      | 1.2±0.3     | 0.621  |
| Phosphatidylcholines | PC aa C42:2 | 1.8±0.3    | 1.9±0.1     | 0.408 | 1.9±0.2      | 1.6±0.3     | 0.165  |
| Phosphatidylcholines | PC aa C42:4 | 4.6±0.7    | 6.7±0.8     | 0.01* | 4.6±1.2      | 4.1±0.3     | 0.532  |
| Phosphatidylcholines | PC aa C42:5 | 7.2±0.4    | 7.7±0.2     | 0.066 | 5.6±0.8      | 5.7±1.1     | 0.938  |
| Phosphatidylcholines | PC aa C42:6 | 4.4±0.3    | 4.9±0.6     | 0.221 | 3.9±0.3      | 4.4±0.6     | 0.188  |
| Phosphatidylcholines | PC ae C30:0 | 32.3±3.2   | 29.5±3.5    | 0.336 | 54±11.6      | 54.5±5.4    | 0.943  |
| Phosphatidylcholines | PC ae C30:1 | 2.3±0.3    | 2.3±0.2     | 0.959 | 3±0.4        | 2.6±0.4     | 0.231  |
| Phosphatidylcholines | PC ae C30:2 | 0.7±0.1    | 0.6±0.1     | 0.401 | 0.6±0.2      | 0.6±0.1     | 0.661  |
| Phosphatidylcholines | PC ae C32:1 | 46.9±3.1   | 48.7±1.7    | 0.387 | 52.2±7.8     | 41.3±5.1    | 0.088  |
| Phosphatidylcholines | PC ae C32:2 | 11.8±0.7   | 11.7±0.7    | 0.86  | 24.6±8.8     | 20.8±3.5    | 0.506  |
| Phosphatidylcholines | PC ae C34:0 | 21.7±1.6   | 22.9±2.6    | 0.525 | 20.4±2.1     | 21.1±2.9    | 0.754  |
| Phosphatidylcholines | PC ae C34:1 | 157±9.1    | 163.5±2.3   | 0.273 | 164.3±32.8   | 134.8±31.7  | 0.305  |
| Phosphatidylcholines | PC ae C34:2 | 73.7±5.6   | 76.7±2.9    | 0.443 | 104.1±25.5   | 93.2±7.5    | 0.501  |
| Phosphatidylcholines | PC ae C34:3 | 20.8±1.8   | 21.3±1.7    | 0.76  | 30.8±4.2     | 31.1±5.7    | 0.949  |
| Phosphatidylcholines | PC ae C36:0 | 8.8±1.5    | 7.6±1.3     | 0.303 | 7.5±1.6      | 7.7±1.2     | 0.914  |
| Phosphatidylcholines | PC ae C36:1 | 25.6±4.2   | 27.7±2.7    | 0.48  | 23.9±4.2     | 24.8±3.5    | 0.799  |
| Phosphatidylcholines | PC ae C36:2 | 25.3±4.2   | 26.6±2.7    | 0.662 | 31.2±3.9     | 29.4±3.5    | 0.584  |
| Phosphatidylcholines | PC ae C36:3 | 25.7±2.5   | 24.8±1.4    | 0.59  | 33.1±7.4     | 26.9±2.5    | 0.213  |
| Phosphatidylcholines | PC ae C36:4 | 245±5.7    | 246.5±12.9  | 0.86  | 297.5±51.9   | 293.3±27.7  | 0.905  |
| Phosphatidylcholines | PC ae C36:5 | 227.5±11.8 | 239±10.1    | 0.244 | 235±25.9     | 258.3±36.2  | 0.401  |
| Phosphatidylcholines | PC ae C38:0 | 56.2±1.5   | 60.9±2.1    | 0.02* | 37.5±5.6     | 46.5±4.6    | 0.075  |
| Phosphatidylcholines | PC ae C38:1 | 3.2±0.7    | 4.6±1.4     | 0.16  | 3.6±0.6      | 3.6±1.8     | 0.981  |
| Phosphatidylcholines | PC ae C38:2 | 6.4±1.2    | 7±1.8       | 0.605 | 7.2±1.2      | 8.4±1.9     | 0.388  |
| Phosphatidylcholines | PC ae C38:3 | 7±0.4      | 7.4±1.3     | 0.644 | 6.7±1        | 8.5±3       | 0.354  |
| Phosphatidylcholines | PC ae C38:4 | 48.5±6.4   | 49.1±3      | 0.877 | 51.7±8.4     | 50.3±7.6    | 0.839  |
| Phosphatidylcholines | PC ae C38:5 | 136.3±14.2 | 140.8±16.2  | 0.729 | 191.3±46.6   | 156.5±17.1  | 0.271  |
| Phosphatidylcholines | PC ae C38:6 | 1151.3±61  | 1120.8±62.7 | 0.568 | 1451.5±374.5 | 1606.5±37.4 | 0.503  |
| Phosphatidylcholines | PC ae C40:1 | 99.4±6.4   | 104.9±16.4  | 0.607 | 82.1±15.2    | 108.1±8.9   | 0.043* |
| Phosphatidylcholines | PC ae C40:2 | 5.1±0.3    | 5.9±0.9     | 0.203 | 5±1.2        | 5.8±0.7     | 0.301  |
| Phosphatidylcholines | PC ae C40:3 | 4.7±1.4    | 4.3±0.7     | 0.654 | 3.5±1.1      | 3.4±1.4     | 0.953  |
| Phosphatidylcholines | PC ae C40:4 | 9.9±0.7    | 11.1±1.1    | 0.14  | 8.8±1.6      | 9.3±2.1     | 0.748  |
| Phosphatidylcholines | PC ae C40:5 | 10.9±1.4   | 10.4±0.7    | 0.608 | 12.8±1.5     | 12.2±2.2    | 0.717  |

|                      |                     |          |          |        |           |           |                     |
|----------------------|---------------------|----------|----------|--------|-----------|-----------|---------------------|
| Phosphatidylcholines | PC ae C40:6         | 69.6±2.6 | 65.9±4.3 | 0.254  | 84.1±15.4 | 87.6±11.5 | 0.764               |
| Phosphatidylcholines | PC ae C42:0         | 5.8±0.3  | 6.5±0.7  | 0.134  | 4.7±0.5   | 4.7±0.4   | 0.995               |
| Phosphatidylcholines | PC ae C42:1         | 7.9±0.8  | 8.7±1.2  | 0.359  | 7.1±0.7   | 7.3±1.3   | 0.857               |
| Phosphatidylcholines | PC ae C42:2         | 5.8±0.3  | 6.4±0.8  | 0.249  | 4.7±1.2   | 5.1±0.8   | 0.643               |
| Phosphatidylcholines | PC ae C42:3         | 25.6±3.3 | 26.8±2.5 | 0.608  | 15.7±5.9  | 20.9±0.9  | 0.18                |
| Phosphatidylcholines | PC ae C42:4         | 1.8±0.3  | 1.8±0.3  | 0.999  | 1.6±0.4   | 1.7±0.4   | 0.681               |
| Phosphatidylcholines | PC ae C42:5         | 3.5±0.3  | 4.6±1    | 0.102  | 3.3±0.5   | 2.9±0.3   | 0.217               |
| Phosphatidylcholines | PC ae C44:3         | 1.7±0.3  | 1.6±0.2  | 0.53   | 1.3±0.3   | 1.5±0.2   | 0.216               |
| Phosphatidylcholines | PC ae C44:4         | 1.3±0.2  | 1.2±0.2  | 0.842  | 1±0.3     | 1.2±0.1   | 0.262               |
| Phosphatidylcholines | PC ae C44:5         | 2.3±0.5  | 2.2±0.1  | 0.766  | 1.8±0.7   | 2.3±0.1   | 0.19                |
| Phosphatidylcholines | PC ae C44:6         | 1.2±0.5  | 1±0.2    | 0.403  | 0.9±0.3   | 0.8±0.1   | 0.296               |
| Dihexosylceramides   | Hex2Cer(d18:1/14:0) | 2±0.3    | 2.4±0.7  | 0.345  | 2.5±0.3   | 2.6±1     | 0.791               |
| Dihexosylceramides   | Hex2Cer(d18:1/16:0) | 3.6±0.5  | 3.9±0.8  | 0.543  | 4.2±0.3   | 4.3±1.2   | 0.921               |
| Dihexosylceramides   | Hex2Cer(d18:1/18:0) | 2.7±0.4  | 3.3±0.7  | 0.278  | 3.1±0.3   | 2.9±0.8   | 0.676               |
| Dihexosylceramides   | Hex2Cer(d18:1/20:0) | 0.3±0.1  | 0.4±0.1  | 0.351  | 0.4±0.1   | 0.4±0.1   | 0.684               |
| Dihexosylceramides   | Hex2Cer(d18:1/22:0) | 0.9±0.2  | 0.9±0.1  | 0.948  | 0.9±0.2   | 1±0.2     | 0.22                |
| Dihexosylceramides   | Hex2Cer(d18:1/24:0) | 0.8±0.1  | 0.9±0.1  | 0.292  | 0.9±0.1   | 1±0.2     | 0.336               |
| Dihexosylceramides   | Hex2Cer(d18:1/24:1) | 0.3±0.1  | 0.4±0.1  | 0.166  | 0.5±0.1   | 0.5±0.1   | 0.899               |
| Dihexosylceramides   | Hex2Cer(d18:1/26:0) | 0.1±0.1  | 0.1±0.1  | 0.856  | 0.1±0.1   | 0.1±0.1   | 0.027* <sup>§</sup> |
| Dihexosylceramides   | Hex2Cer(d18:1/26:1) | 0.5±0.1  | 0.5±0.2  | 0.659  | 0.5±0.1   | 0.4±0.1   | 0.362               |
| Trihexosylceramides  | Hex3Cer(d18:1/16:0) | 2±0.4    | 2.3±0.2  | 0.121  | 5.1±2     | 4.2±0.8   | 0.5                 |
| Trihexosylceramides  | Hex3Cer(d18:1/18:0) | 0.9±0.2  | 0.9±0.2  | 0.957  | 1.2±0.3   | 1±0.3     | 0.493               |
| Trihexosylceramides  | Hex3Cer(d18:1/24:1) | 1.3±0.3  | 1.5±0.3  | 0.219  | 2.9±1     | 2.5±0.8   | 0.616               |
| Trihexosylceramides  | Hex3Cer(d18:1/26:1) | 1.7±0.5  | 1.9±0.4  | 0.654  | 1.9±0.5   | 1.9±0.2   | 0.941               |
| Trihexosylceramides  | Hex3Cer(d18:1_20:0) | 1.4±0.2  | 1.4±0.2  | 0.497  | 2.9±0.4   | 3.7±1.6   | 0.457               |
| Trihexosylceramides  | Hex3Cer(d18:1_22:0) | 3.8±0.5  | 4.2±0.7  | 0.338  | 6.2±1     | 7.2±1.8   | 0.439               |
| Hexosylceramides     | HexCer(d16:1/22:0)  | 0.1±0.1  | 0.1±0.1  | 0.205  | 0.1±0.1   | 0.1±0.1   | 0.688               |
| Hexosylceramides     | HexCer(d18:1/14:0)  | 0.2±0.1  | 0.2±0.1  | 0.591  | 0.2±0.1   | 0.2±0.1   | 0.081               |
| Hexosylceramides     | HexCer(d18:1/16:0)  | 3.8±0.9  | 4.6±0.6  | 0.244  | 7±2.8     | 5.7±0.7   | 0.457               |
| Hexosylceramides     | HexCer(d18:1/18:0)  | 0.9±0.3  | 1.1±0.1  | 0.292  | 1.4±0.4   | 1.4±0.4   | 0.841               |
| Hexosylceramides     | HexCer(d18:1/18:1)  | 0.4±0.1  | 0.5±0.1  | 0.029* | 0.5±0.2   | 0.5±0.2   | 0.903               |
| Hexosylceramides     | HexCer(d18:1/20:0)  | 3.2±0.8  | 3.7±0.3  | 0.257  | 5±1       | 5.5±1.3   | 0.603               |
| Hexosylceramides     | HexCer(d18:1/22:0)  | 16±3.2   | 18.6±1.2 | 0.225  | 23.7±5.7  | 24.3±4.6  | 0.891               |
| Hexosylceramides     | HexCer(d18:1/23:0)  | 3.5±0.8  | 3.8±0.2  | 0.531  | 5.5±1.9   | 5.3±1.1   | 0.852               |
| Hexosylceramides     | HexCer(d18:1/24:0)  | 7.2±1.2  | 8.9±1.1  | 0.116  | 9.8±1.2   | 10.6±1.9  | 0.569               |
| Hexosylceramides     | HexCer(d18:1/24:1)  | 13.8±1.6 | 17.5±2.4 | 0.064  | 19.1±4.4  | 18.9±3.2  | 0.945               |
| Hexosylceramides     | HexCer(d18:1/26:0)  | 0.3±0.1  | 0.4±0.1  | 0.238  | 0.4±0.2   | 0.5±0.1   | 0.433               |
| Hexosylceramides     | HexCer(d18:1/26:1)  | 0.9±0.2  | 1.1±0.2  | 0.056  | 1.1±0.2   | 1.2±0.5   | 0.614               |
| Hexosylceramides     | HexCer(d18:2/16:0)  | 0.2±0.1  | 0.2±0.1  | 0.999  | 0.4±0.1   | 0.4±0.1   | 0.786               |

|                         |                         |             |             |                     |              |              |        |
|-------------------------|-------------------------|-------------|-------------|---------------------|--------------|--------------|--------|
| Hexosylceramides        | HexCer(d18:2/20:0)      | 0.2±0.1     | 0.2±0.1     | 0.28                | 0.2±0.1      | 0.2±0.1      | 0.701  |
| Hexosylceramides        | HexCer(d18:2/22:0)      | 1.4±0.2     | 1.7±0.1     | 0.045*              | 2.1±0.5      | 2.3±0.3      | 0.67   |
| Hexosylceramides        | HexCer(d18:2/23:0)      | 0.7±0.1     | 0.7±0.1     | 0.77                | 0.8±0.2      | 0.9±0.2      | 0.446  |
| Hexosylceramides        | HexCer(d18:2/24:0)      | 3.7±0.8     | 4.4±1.2     | 0.416               | 4.9±0.6      | 5.3±1.2      | 0.613  |
| Indoles and derivatives | Indoleacetic acid       | 1±0.2       | 1±0.2       | 0.999               | 1.1±0.4      | 1.3±0.3      | 0.515  |
| Indoles and derivatives | Indole-3-propionic acid | 0.3±0.2     | 0.6±0.2     | 0.101               | 0.4±0.1      | 0.4±0.2      | 0.823  |
| Indoles and derivatives | Indoxyl sulfate         | 0.6±0.4     | 1.4±0.2     | 0.011* <sup>§</sup> | 6.8±7.8      | 1.4±0.6      | 0.28   |
| Sphingomyelins          | SM (OH) C14:1           | 23.6±2.5    | 22.9±2.9    | 0.744               | 16.5±2.4     | 19.9±3.6     | 0.208  |
| Sphingomyelins          | SM (OH) C16:1           | 6.9±0.9     | 7.1±1       | 0.796               | 6.8±0.5      | 6.8±1.1      | 0.983  |
| Sphingomyelins          | SM (OH) C22:1           | 39.3±5.8    | 43.1±3.6    | 0.372               | 36.2±4.4     | 48.3±6.8     | 0.04*  |
| Sphingomyelins          | SM (OH) C22:2           | 12.4±1.8    | 12.8±1.9    | 0.805               | 11.1±1.2     | 14.1±1.8     | 0.05*  |
| Sphingomyelins          | SM (OH) C24:1           | 4.2±0.6     | 4.9±0.8     | 0.228               | 4±0.9        | 5.2±0.9      | 0.106  |
| Sphingomyelins          | SM C16:0                | 1207.8±85.5 | 1225.8±36   | 0.749               | 1076.8±146.9 | 1272.8±104.6 | 0.109  |
| Sphingomyelins          | SM C16:1                | 199.5±6.4   | 201±11.1    | 0.846               | 210±42.1     | 226±22.6     | 0.583  |
| Sphingomyelins          | SM C18:0                | 63.6±8.4    | 72.1±3.9    | 0.16                | 57.4±2.7     | 70.1±9.4     | 0.065  |
| Sphingomyelins          | SM C18:1                | 10.8±0.7    | 11.1±0.5    | 0.522               | 8.3±0.5      | 10.4±1.2     | 0.025* |
| Sphingomyelins          | SM C20:2                | b.dl.       | b.dl.       | n.a.                | b.dl.        | b.dl.        | n.a.   |
| Sphingomyelins          | SM C22:3                | 0.7±1.2     | 1.5±1.7     | 0.527               | 1.9±1.2      | 2.5±1.9      | 0.633  |
| Sphingomyelins          | SM C24:0                | 212.5±21.3  | 230±21.2    | 0.352               | 175.3±23.9   | 246.3±46.8   | 0.058  |
| Sphingomyelins          | SM C24:1                | 280.8±34.4  | 298.5±40.4  | 0.583               | 249.3±28     | 292.8±50.5   | 0.24   |
| Sphingomyelins          | SM C26:0                | 1.4±0.5     | 1.6±0.5     | 0.47                | 1.2±0.4      | 1.5±0.4      | 0.382  |
| Sphingomyelins          | SM C26:1                | 1.3±0.1     | 1.7±0.8     | 0.441               | 1.1±0.5      | 1.5±0.4      | 0.253  |
| Triacylglycerole        | TG(14:0_32:2)           | 66.5±29     | 155.3±103.2 | 0.202               | 132.3±139.8  | 137±92.7     | 0.963  |
| Triacylglycerole        | TG(14:0_34:0)           | 12±3.9      | 29.8±22.5   | 0.227               | 19.4±17.9    | 19.8±11.6    | 0.977  |
| Triacylglycerole        | TG(14:0_34:1)           | 89.5±33.8   | 228.8±170.6 | 0.215               | 121±117.5    | 114.6±81.1   | 0.941  |
| Triacylglycerole        | TG(14:0_34:2)           | 99.5±38.3   | 233.6±146.8 | 0.177               | 158.2±170.5  | 137.8±86     | 0.86   |
| Triacylglycerole        | TG(14:0_34:3)           | 27.2±10.9   | 57±22.4     | 0.084               | 30.8±31      | 28±15.4      | 0.894  |
| Triacylglycerole        | TG(14:0_35:1)           | 1.1±0.4     | 2.4±1.8     | 0.266               | 1.7±1.1      | 1.6±0.9      | 0.912  |
| Triacylglycerole        | TG(14:0_35:2)           | 1.7±0.7     | 3.4±2.2     | 0.214               | 3.3±2.8      | 2.8±1.2      | 0.75   |
| Triacylglycerole        | TG(14:0_36:1)           | 13±5.1      | 38.9±36.6   | 0.27                | 15.2±11      | 24.2±21.6    | 0.542  |
| Triacylglycerole        | TG(14:0_36:2)           | 67.5±28     | 178.4±136.8 | 0.219               | 61±43.5      | 88.9±81.1    | 0.619  |
| Triacylglycerole        | TG(14:0_36:3)           | 68±29.1     | 165.8±123.5 | 0.231               | 90±82.6      | 107±85.6     | 0.813  |
| Triacylglycerole        | TG(14:0_36:4)           | 20.3±7.3    | 42.5±26.9   | 0.217               | 52.6±58.5    | 47.3±26      | 0.891  |
| Triacylglycerole        | TG(14:0_38:4)           | 4±1.2       | 5.5±1.7     | 0.247               | 8.1±7.1      | 8.7±4        | 0.895  |
| Triacylglycerole        | TG(14:0_38:5)           | 3.7±1.3     | 5±1.7       | 0.325               | 9.2±8.4      | 9.1±4.5      | 0.986  |
| Triacylglycerole        | TG(16:0_28:1)           | 48.9±21.9   | 108.7±43.1  | 0.076               | 17.7±7.5     | 30.1±23.9    | 0.422  |
| Triacylglycerole        | TG(16:0_28:2)           | 9±4.3       | 19.1±10.5   | 0.173               | 5.9±2.7      | 9.8±8.9      | 0.491  |
| Triacylglycerole        | TG(16:0_30:2)           | 132.1±61.5  | 312.5±241.4 | 0.257               | 103.2±61.1   | 188.7±173.6  | 0.452  |
| Triacylglycerole        | TG(16:0_32:0)           | 24.5±7.4    | 59.4±38.6   | 0.175               | 48.1±51.5    | 38.3±17.2    | 0.764  |

|                  |               |            |             |         |             |            |       |
|------------------|---------------|------------|-------------|---------|-------------|------------|-------|
| Triacylglycerole | TG(16:0_32:1) | 110.6±43.3 | 267.5±176.5 | 0.186   | 145.4±144.4 | 127.9±86.3 | 0.863 |
| Triacylglycerole | TG(16:0_32:2) | 81.8±32.4  | 191.8±130.3 | 0.206   | 160.8±180.5 | 129.3±74.1 | 0.79  |
| Triacylglycerole | TG(16:0_32:3) | 9.1±3.4    | 17.8±7.2    | 0.105   | 14.1±13.6   | 12.7±6.4   | 0.877 |
| Triacylglycerole | TG(16:0_33:1) | 1.9±0.8    | 4±1.7       | 0.091   | 5.4±5.4     | 3.1±1.2    | 0.493 |
| Triacylglycerole | TG(16:0_33:2) | 1.4±0.7    | 2.6±0.8     | 0.09    | 4.8±5       | 2.5±1      | 0.465 |
| Triacylglycerole | TG(16:0_34:0) | 10±3.2     | 24.7±17.6   | 0.204   | 17.8±18.2   | 12.2±4.5   | 0.623 |
| Triacylglycerole | TG(16:0_34:1) | 99.3±30    | 260.7±191.9 | 0.201   | 162.7±173.4 | 111.7±61.1 | 0.649 |
| Triacylglycerole | TG(16:0_34:2) | 120.3±40.5 | 291.5±179.4 | 0.158   | 213.8±249.1 | 132.4±63.9 | 0.603 |
| Triacylglycerole | TG(16:0_34:3) | 38±13.5    | 78.7±32.4   | 0.091   | 42.2±45.8   | 30.1±14.5  | 0.677 |
| Triacylglycerole | TG(16:0_34:4) | 4.7±1.6    | 7.4±1.2     | 0.055   | 10±9.7      | 7.9±3.5    | 0.742 |
| Triacylglycerole | TG(16:0_35:1) | 1±0.5      | 2.4±1.9     | 0.242   | 2.2±1.8     | 1.5±0.6    | 0.497 |
| Triacylglycerole | TG(16:0_35:2) | 1.7±0.6    | 4.1±2.1     | 0.107   | 3.8±3.3     | 2.2±0.7    | 0.456 |
| Triacylglycerole | TG(16:0_35:3) | 1.2±0.4    | 2.1±1.1     | 0.209   | 3.1±3.4     | 1.6±0.6    | 0.495 |
| Triacylglycerole | TG(16:0_36:2) | 91±29.1    | 233.5±164.4 | 0.19    | 96.3±81.8   | 91.4±64.3  | 0.938 |
| Triacylglycerole | TG(16:0_36:3) | 95.6±32    | 231.9±166.6 | 0.214   | 151.7±157.6 | 121.5±74.4 | 0.775 |
| Triacylglycerole | TG(16:0_36:4) | 31.2±8.6   | 62±37.6     | 0.216   | 91.4±109.4  | 55.5±25    | 0.6   |
| Triacylglycerole | TG(16:0_36:5) | 4.5±1.1    | 6.9±1.6     | 0.073   | 13.6±14.7   | 9.9±4.4    | 0.692 |
| Triacylglycerole | TG(16:0_36:6) | 3.8±1.4    | 4.2±1.4     | 0.718   | 12.8±12.2   | 11.4±5.4   | 0.864 |
| Triacylglycerole | TG(16:0_37:3) | 0.4±0.2    | 0.8±0.5     | 0.258   | 0.7±0.7     | 0.5±0.2    | 0.539 |
| Triacylglycerole | TG(16:0_38:1) | 0.8±0.3    | 2.2±1.8     | 0.205   | 1.3±1       | 1.3±0.5    | 0.933 |
| Triacylglycerole | TG(16:0_38:2) | 2.6±0.8    | 6.3±5.5     | 0.291   | 3.4±2.9     | 3.2±1.4    | 0.93  |
| Triacylglycerole | TG(16:0_38:3) | 3.1±0.7    | 6.3±4.5     | 0.248   | 6.8±7.1     | 5.1±1.8    | 0.705 |
| Triacylglycerole | TG(16:0_38:4) | 4.8±0.9    | 7.2±1.6     | 0.06    | 11.9±12     | 8.5±4.1    | 0.653 |
| Triacylglycerole | TG(16:0_38:5) | 6.4±1.6    | 8±1         | 0.193   | 13.8±13     | 11.6±5.1   | 0.797 |
| Triacylglycerole | TG(16:0_38:6) | 7.3±1.6    | 8±1.5       | 0.601   | 20±18.5     | 16.5±7.8   | 0.768 |
| Triacylglycerole | TG(16:0_38:7) | 1.4±0.4    | 1.7±0.7     | 0.515   | 3.3±3.6     | 2.6±1.4    | 0.728 |
| Triacylglycerole | TG(16:0_40:6) | 2.5±0.5    | 2.6±0.3     | 0.822   | 7.8±7.5     | 5.7±2.5    | 0.671 |
| Triacylglycerole | TG(16:0_40:7) | 3.5±0.8    | 3.4±1.1     | 0.874   | 14.4±15.1   | 9±4.7      | 0.575 |
| Triacylglycerole | TG(16:0_40:8) | 2.8±0.7    | 2.7±1       | 0.826   | 11.1±11.7   | 8.3±4.4    | 0.71  |
| Triacylglycerole | TG(16:1_28:0) | 54.1±26.5  | 106.7±31.9  | 0.07    | 28.6±19     | 34.1±21.3  | 0.752 |
| Triacylglycerole | TG(16:1_30:1) | 83±38.4    | 178.5±66    | 0.074   | 20.6±11.5   | 42.3±39.4  | 0.396 |
| Triacylglycerole | TG(16:1_32:0) | 16.7±6.2   | 35.8±12.1   | 0.05    | 15.5±16.4   | 9.7±5.3    | 0.577 |
| Triacylglycerole | TG(16:1_32:1) | 51.7±22.1  | 119.7±41.7  | 0.047*§ | 24.2±19     | 23.9±16.9  | 0.985 |
| Triacylglycerole | TG(16:1_32:2) | 30.1±12.8  | 67.6±24.7   | 0.058   | 21±20.4     | 20.2±13.7  | 0.956 |
| Triacylglycerole | TG(16:1_33:1) | 0.7±0.3    | 2.4±0.7     | 0.008*§ | 1.2±0.8     | 0.6±0.6    | 0.372 |
| Triacylglycerole | TG(16:1_34:0) | 6.3±1.9    | 13.9±5.2    | 0.055   | 4.5±4.1     | 3.7±2.2    | 0.76  |
| Triacylglycerole | TG(16:1_34:1) | 52.4±19.6  | 121.6±49.5  | 0.066   | 28.1±25.2   | 22.9±15.6  | 0.77  |
| Triacylglycerole | TG(16:1_34:2) | 53.9±22    | 124.3±44.8  | 0.051   | 30.3±30.3   | 24.2±15.6  | 0.766 |
| Triacylglycerole | TG(16:1_34:3) | 13.9±5.9   | 31.2±10.5   | 0.047*§ | 6.2±5.6     | 5.3±3.5    | 0.826 |

|                  |               |           |           |                     |           |           |       |
|------------------|---------------|-----------|-----------|---------------------|-----------|-----------|-------|
| Triacylglycerole | TG(16:1_36:1) | 6.9±2.8   | 16.9±9.3  | 0.122               | 3.1±2.4   | 4.5±3.5   | 0.591 |
| Triacylglycerole | TG(16:1_36:2) | 42±17.6   | 98.6±40.8 | 0.07                | 16.2±11.6 | 20.8±16.5 | 0.705 |
| Triacylglycerole | TG(16:1_36:3) | 36.6±15.6 | 81.2±34.4 | 0.087               | 23.1±20.3 | 21±15.5   | 0.893 |
| Triacylglycerole | TG(16:1_36:4) | 8.9±3.3   | 17.7±5.9  | 0.062               | 11.8±13.2 | 7.3±3.6   | 0.592 |
| Triacylglycerole | TG(16:1_36:5) | 1.2±0.4   | 2.2±0.5   | 0.021* <sup>§</sup> | 1.7±1.8   | 1.1±0.5   | 0.579 |
| Triacylglycerole | TG(16:1_38:3) | 1.1±0.4   | 2.4±1.1   | 0.092               | 1.3±1.1   | 1±0.5     | 0.684 |
| Triacylglycerole | TG(16:1_38:4) | 1.7±0.3   | 2.5±0.4   | 0.013* <sup>§</sup> | 1.9±1.6   | 1.7±0.4   | 0.873 |
| Triacylglycerole | TG(16:1_38:5) | 1.6±0.4   | 2.3±0.6   | 0.104               | 2.2±1.8   | 1.5±0.5   | 0.553 |
| Triacylglycerole | TG(17:0_32:1) | 0.7±0.2   | 2.1±2     | 0.247               | 1±1       | 1.1±0.5   | 0.792 |
| Triacylglycerole | TG(17:0_34:1) | 1±0.4     | 1.7±1.4   | 0.375               | 1.1±1     | 1.1±0.7   | 0.955 |
| Triacylglycerole | TG(17:0_34:2) | 0.9±0.4   | 2.1±1.6   | 0.257               | 1.2±1.3   | 1.1±0.4   | 0.852 |
| Triacylglycerole | TG(17:0_34:3) | 0.3±0.2   | 0.7±0.4   | 0.124               | 0.4±0.3   | 0.3±0.3   | 0.925 |
| Triacylglycerole | TG(17:0_36:3) | 0.6±0.3   | 1.5±1.5   | 0.339               | 1.1±1     | 0.9±0.8   | 0.851 |
| Triacylglycerole | TG(17:0_36:4) | 0.3±0.1   | 0.6±0.4   | 0.271               | 0.8±0.7   | 0.5±0.2   | 0.556 |
| Triacylglycerole | TG(17:1_32:1) | 1.3±0.7   | 2.6±1.3   | 0.156               | 1.4±1.3   | 1.3±0.7   | 0.874 |
| Triacylglycerole | TG(17:1_34:1) | 1.1±0.4   | 2.7±1.4   | 0.109               | 1.4±1.2   | 0.9±0.6   | 0.612 |
| Triacylglycerole | TG(17:1_34:2) | 1.5±0.6   | 2.8±1.6   | 0.214               | 1.4±1.4   | 1.2±0.6   | 0.851 |
| Triacylglycerole | TG(17:1_34:3) | 0.5±0.2   | 1±0.4     | 0.107               | 0.4±0.3   | 0.5±0.2   | 0.597 |
| Triacylglycerole | TG(17:1_36:3) | 0.8±0.4   | 1.9±1.3   | 0.199               | 1±0.8     | 0.9±0.5   | 0.927 |
| Triacylglycerole | TG(17:1_36:4) | 0.4±0.1   | 0.7±0.4   | 0.266               | 0.8±0.6   | 0.5±0.2   | 0.533 |
| Triacylglycerole | TG(17:1_38:5) | 0.4±0.1   | 0.5±0.1   | 0.063               | 0.5±0.4   | 0.5±0.2   | 0.829 |
| Triacylglycerole | TG(17:1_38:6) | 0.2±0.1   | 0.2±0.1   | 0.565               | 0.5±0.4   | 0.4±0.1   | 0.552 |
| Triacylglycerole | TG(17:1_38:7) | 0.1±0.1   | 0.1±0.1   | 0.852               | 0.1±0.1   | 0.1±0.1   | 0.909 |
| Triacylglycerole | TG(17:2_34:2) | 0.2±0.1   | 0.3±0.2   | 0.195               | 0.3±0.3   | 0.2±0.1   | 0.659 |
| Triacylglycerole | TG(17:2_36:2) | 0.3±0.1   | 0.5±0.2   | 0.168               | 0.3±0.2   | 0.4±0.2   | 0.148 |
| Triacylglycerole | TG(17:2_36:3) | 0.3±0.1   | 0.4±0.2   | 0.17                | 0.4±0.3   | 0.4±0.2   | 0.909 |
| Triacylglycerole | TG(17:2_36:4) | 0.3±0.1   | 0.5±0.2   | 0.161               | 0.5±0.4   | 0.5±0.2   | 0.892 |
| Triacylglycerole | TG(17:2_38:5) | 0.2±0.1   | 0.4±0.2   | 0.121               | 0.3±0.3   | 0.3±0.2   | 0.685 |
| Triacylglycerole | TG(17:2_38:6) | 0.3±0.1   | 0.3±0.1   | 0.575               | 0.3±0.2   | 0.4±0.2   | 0.411 |
| Triacylglycerole | TG(17:2_38:7) | 0.1±0.1   | 0.2±0.1   | 0.082               | 0.2±0.1   | 0.1±0.1   | 0.16  |
| Triacylglycerole | TG(18:0_30:0) | 5.3±1.5   | 12.9±11.7 | 0.302               | 10.6±9.1  | 12.9±6.4  | 0.731 |
| Triacylglycerole | TG(18:0_30:1) | 15.8±7.2  | 52.1±53.8 | 0.291               | 15.3±6.7  | 38.3±40   | 0.364 |
| Triacylglycerole | TG(18:0_32:0) | 2.3±1     | 5.6±4.6   | 0.264               | 4.5±4     | 5±2.2     | 0.852 |
| Triacylglycerole | TG(18:0_32:1) | 9.4±3.7   | 26.4±25.6 | 0.298               | 13.2±10.6 | 20.1±15.5 | 0.545 |
| Triacylglycerole | TG(18:0_32:2) | 8.5±3.2   | 22.1±22   | 0.329               | 16.2±14.6 | 23.1±16.5 | 0.612 |
| Triacylglycerole | TG(18:0_34:2) | 10.1±2.6  | 26.3±24.6 | 0.299               | 18±17.4   | 19.2±10.1 | 0.924 |
| Triacylglycerole | TG(18:0_34:3) | 3.3±1.1   | 7.4±4.5   | 0.174               | 4.6±4     | 4.3±2.4   | 0.923 |
| Triacylglycerole | TG(18:0_36:1) | 1.4±0.5   | 4.7±4.5   | 0.255               | 2.4±1.2   | 3.2±2.1   | 0.59  |
| Triacylglycerole | TG(18:0_36:2) | 7.2±2.6   | 23.3±24.1 | 0.294               | 11.2±8.1  | 14.5±11.1 | 0.685 |



|                  |               |             |             |                     |             |             |       |
|------------------|---------------|-------------|-------------|---------------------|-------------|-------------|-------|
| Triacylglycerole | TG(18:0_36:3) | 9.6±3       | 25.2±24.9   | 0.32                | 20±18.2     | 21.4±14     | 0.916 |
| Triacylglycerole | TG(18:0_36:4) | 5.3±1.3     | 10±6.9      | 0.286               | 13.8±13.9   | 12.3±5      | 0.867 |
| Triacylglycerole | TG(18:0_36:5) | 1.1±0.3     | 1.5±0.5     | 0.196               | 2.1±1.9     | 1.9±0.9     | 0.906 |
| Triacylglycerole | TG(18:0_38:6) | 2±0.4       | 2.3±0.6     | 0.39                | 4.6±4.1     | 3.9±1.6     | 0.794 |
| Triacylglycerole | TG(18:0_38:7) | 0.4±0.1     | 0.5±0.3     | 0.363               | 0.8±0.7     | 0.7±0.3     | 0.934 |
| Triacylglycerole | TG(18:1_26:0) | 119.5±55.4  | 269±182     | 0.223               | 100.4±48    | 192.9±177.8 | 0.418 |
| Triacylglycerole | TG(18:1_28:1) | 66.2±30.9   | 140.6±54.6  | 0.086               | 17.9±9.7    | 41.3±38.2   | 0.342 |
| Triacylglycerole | TG(18:1_30:0) | 91.7±34.2   | 218.9±153.4 | 0.211               | 143.9±140.2 | 137.6±95.4  | 0.951 |
| Triacylglycerole | TG(18:1_30:1) | 255.8±113.6 | 586.8±351.1 | 0.172               | 123.7±62.5  | 267.7±282   | 0.422 |
| Triacylglycerole | TG(18:1_30:2) | 123.2±59.4  | 291.2±203.8 | 0.22                | 78.8±37.3   | 176.4±181.6 | 0.397 |
| Triacylglycerole | TG(18:1_32:0) | 57.6±18     | 139.6±100   | 0.212               | 104.1±105.4 | 75±40.4     | 0.672 |
| Triacylglycerole | TG(18:1_32:1) | 153.2±60.5  | 376.3±231.6 | 0.158               | 119.1±92.8  | 146.3±122.5 | 0.77  |
| Triacylglycerole | TG(18:1_32:2) | 84.1±33.7   | 207±130.5   | 0.165               | 100.9±93.1  | 113.4±88.2  | 0.872 |
| Triacylglycerole | TG(18:1_32:3) | 8±3.2       | 17.7±7.8    | 0.092               | 9.3±7.8     | 11.1±6.2    | 0.762 |
| Triacylglycerole | TG(18:1_33:0) | 0.9±0.2     | 2±1.4       | 0.204               | 1.4±1.3     | 1.1±0.7     | 0.761 |
| Triacylglycerole | TG(18:1_33:1) | 2.4±0.8     | 6.2±3.2     | 0.087               | 3.8±3.4     | 2.8±1.5     | 0.643 |
| Triacylglycerole | TG(18:1_33:2) | 1.6±0.6     | 3.1±1.4     | 0.127               | 2.6±2.8     | 1.9±0.7     | 0.683 |
| Triacylglycerole | TG(18:1_33:3) | 0.3±0.2     | 0.5±0.2     | 0.037* <sup>§</sup> | 0.6±0.5     | 0.4±0.1     | 0.483 |
| Triacylglycerole | TG(18:1_34:1) | 158.8±47.4  | 401.8±260.4 | 0.163               | 146.6±128.4 | 143.7±100.9 | 0.977 |
| Triacylglycerole | TG(18:1_34:2) | 158.6±55.4  | 387±216.2   | 0.127               | 166.3±164.6 | 143.8±92.2  | 0.844 |
| Triacylglycerole | TG(18:1_34:3) | 40.7±15.7   | 89.6±37     | 0.08                | 33.2±30.3   | 29.5±17.4   | 0.863 |
| Triacylglycerole | TG(18:1_34:4) | 3.6±1.2     | 6.6±1.5     | 0.032* <sup>§</sup> | 5.7±5.3     | 5.5±2.5     | 0.959 |
| Triacylglycerole | TG(18:1_35:2) | 2.2±0.8     | 4.8±2.9     | 0.181               | 2±1.6       | 2±1.2       | 0.968 |
| Triacylglycerole | TG(18:1_35:3) | 1±0.4       | 2.1±1.1     | 0.143               | 1.3±1.2     | 1.1±0.7     | 0.831 |
| Triacylglycerole | TG(18:1_36:0) | 2.2±0.7     | 6.1±5.4     | 0.264               | 3±1.9       | 3.7±1.9     | 0.677 |
| Triacylglycerole | TG(18:1_36:1) | 21.4±7.7    | 64±54.4     | 0.228               | 22.3±16     | 28.1±24.4   | 0.742 |
| Triacylglycerole | TG(18:1_36:2) | 103.6±40.7  | 293.5±199.6 | 0.158               | 86.3±64     | 113.9±101.2 | 0.705 |
| Triacylglycerole | TG(18:1_36:3) | 107.1±42.4  | 267.3±181.2 | 0.187               | 134.8±121   | 130.8±100.5 | 0.967 |
| Triacylglycerole | TG(18:1_36:4) | 30.2±10.2   | 65±39.5     | 0.191               | 68.9±74.4   | 51.5±25.9   | 0.716 |
| Triacylglycerole | TG(18:1_36:5) | 3.7±0.9     | 6.7±2.3     | 0.081               | 9.5±10.1    | 7.3±3.2     | 0.736 |
| Triacylglycerole | TG(18:1_36:6) | 2±0.8       | 2.2±1.1     | 0.785               | 6.4±6       | 5.6±2.7     | 0.846 |
| Triacylglycerole | TG(18:1_38:5) | 5.2±1       | 7.1±1.3     | 0.094               | 11.4±10.7   | 9.1±3.6     | 0.733 |
| Triacylglycerole | TG(18:1_38:6) | 4.7±0.8     | 5.3±1.4     | 0.538               | 14.3±13.8   | 10.6±4.6    | 0.677 |
| Triacylglycerole | TG(18:1_38:7) | 0.8±0.3     | 1.2±0.5     | 0.212               | 1.6±1.4     | 1.4±0.6     | 0.822 |
| Triacylglycerole | TG(18:2_28:0) | 119.2±53.8  | 273.8±199.6 | 0.243               | 170.9±144.5 | 221.1±158   | 0.699 |
| Triacylglycerole | TG(18:2_30:0) | 73.3±26     | 170.9±127.4 | 0.242               | 190.9±210.6 | 159.3±91.2  | 0.82  |
| Triacylglycerole | TG(18:2_30:1) | 123.5±57.6  | 281.5±183.4 | 0.205               | 91.1±48.5   | 174.9±168.8 | 0.44  |
| Triacylglycerole | TG(18:2_32:0) | 49.9±15.2   | 110.6±81.2  | 0.251               | 148.6±175.2 | 89.5±40.7   | 0.591 |
| Triacylglycerole | TG(18:2_32:1) | 82.4±31.3   | 190.1±118.2 | 0.178               | 120.7±121.7 | 110.9±76.6  | 0.911 |

|                  |               |           |             |         |             |            |       |
|------------------|---------------|-----------|-------------|---------|-------------|------------|-------|
| Triacylglycerole | TG(18:2_32:2) | 35.8±13.8 | 80.3±47.9   | 0.173   | 97.1±112.1  | 77.8±40.1  | 0.789 |
| Triacylglycerole | TG(18:2_33:0) | 0.8±0.1   | 1.8±1.5     | 0.241   | 1.8±1.9     | 1.3±0.8    | 0.669 |
| Triacylglycerole | TG(18:2_33:1) | 1.7±0.5   | 3.6±2.3     | 0.203   | 4.1±4.2     | 2.7±1.2    | 0.594 |
| Triacylglycerole | TG(18:2_33:2) | 0.8±0.3   | 1.3±0.5     | 0.223   | 3.2±3.9     | 1.4±0.6    | 0.473 |
| Triacylglycerole | TG(18:2_34:0) | 14.2±3.4  | 34±28.7     | 0.282   | 29.3±30.7   | 25.4±11.9  | 0.846 |
| Triacylglycerole | TG(18:2_34:1) | 88.8±25.4 | 211.7±149.3 | 0.21    | 159.8±175.3 | 116±61.9   | 0.698 |
| Triacylglycerole | TG(18:2_34:2) | 69.7±23.1 | 144.4±74.7  | 0.149   | 162.6±197.8 | 101.4±45.4 | 0.621 |
| Triacylglycerole | TG(18:2_34:3) | 15±5.1    | 29.2±9.2    | 0.058   | 27.5±31.4   | 19.2±8.7   | 0.674 |
| Triacylglycerole | TG(18:2_34:4) | 2.4±0.7   | 3.3±0.7     | 0.136   | 5.8±5.8     | 5.6±2.7    | 0.966 |
| Triacylglycerole | TG(18:2_35:1) | 1±0.6     | 2.2±1.9     | 0.315   | 1.7±1.6     | 1.4±0.7    | 0.761 |
| Triacylglycerole | TG(18:2_35:2) | 1±0.4     | 2.1±1       | 0.107   | 2.4±2.5     | 1.4±0.6    | 0.543 |
| Triacylglycerole | TG(18:2_35:3) | 0.5±0.2   | 0.9±0.6     | 0.27    | 1.3±1.5     | 1±0.4      | 0.686 |
| Triacylglycerole | TG(18:2_36:0) | 2.2±0.6   | 4.9±4.6     | 0.343   | 3.7±3.3     | 4.4±2      | 0.779 |
| Triacylglycerole | TG(18:2_36:1) | 13.7±4.6  | 35.2±30.1   | 0.266   | 25.1±22.9   | 25.2±15.6  | 0.994 |
| Triacylglycerole | TG(18:2_36:2) | 55.4±20.8 | 133.8±90.2  | 0.193   | 86.6±85.4   | 78.6±48.7  | 0.894 |
| Triacylglycerole | TG(18:2_36:3) | 40.9±14.3 | 90.2±57.9   | 0.202   | 109.6±123.9 | 81.3±40.4  | 0.72  |
| Triacylglycerole | TG(18:2_36:4) | 14.2±3.9  | 22.8±9.2    | 0.185   | 63.6±76.4   | 40.8±18    | 0.633 |
| Triacylglycerole | TG(18:2_36:5) | 2.3±0.9   | 3±0.7       | 0.246   | 8.6±9.6     | 6.5±3.5    | 0.727 |
| Triacylglycerole | TG(18:2_38:4) | 4.7±0.9   | 5.8±1.2     | 0.221   | 11.5±11     | 9.7±3.7    | 0.786 |
| Triacylglycerole | TG(18:2_38:5) | 4.4±1.2   | 5±1         | 0.551   | 12.4±12.5   | 10.1±4.9   | 0.778 |
| Triacylglycerole | TG(18:2_38:6) | 4.3±1.1   | 3.7±1.2     | 0.59    | 14.1±14.5   | 11.7±6     | 0.793 |
| Triacylglycerole | TG(18:3_30:0) | 5.1±1.6   | 9±4.1       | 0.17    | 15.7±17.6   | 10.9±5.1   | 0.666 |
| Triacylglycerole | TG(18:3_32:0) | 3.4±1.1   | 5.5±2.1     | 0.167   | 11.1±12.6   | 6.4±2.6    | 0.548 |
| Triacylglycerole | TG(18:3_32:1) | 5.5±2     | 10.4±4.4    | 0.125   | 10.5±11.1   | 8.4±4.5    | 0.772 |
| Triacylglycerole | TG(18:3_34:0) | 1.3±0.2   | 2±1         | 0.246   | 2.5±2.6     | 2±0.9      | 0.749 |
| Triacylglycerole | TG(18:3_34:1) | 6.6±1.8   | 12.2±5.3    | 0.13    | 14.8±16.7   | 9.3±4.2    | 0.598 |
| Triacylglycerole | TG(18:3_34:2) | 4.8±1.3   | 8.8±2.8     | 0.062   | 12.2±14.1   | 7.3±3.4    | 0.583 |
| Triacylglycerole | TG(18:3_34:3) | 1.2±0.3   | 1.9±0.4     | 0.033*§ | 2.1±2.1     | 1.5±0.6    | 0.651 |
| Triacylglycerole | TG(18:3_35:2) | 0.2±0.1   | 0.2±0.1     | 0.096   | 0.3±0.2     | 0.2±0.1    | 0.702 |
| Triacylglycerole | TG(18:3_36:1) | 1.2±0.4   | 2.3±1.3     | 0.22    | 2.2±2       | 2.1±1.1    | 0.987 |
| Triacylglycerole | TG(18:3_36:2) | 4.1±1.1   | 8.3±4.5     | 0.157   | 7.1±6.8     | 6±3.4      | 0.818 |
| Triacylglycerole | TG(18:3_36:3) | 3±0.9     | 5.7±2.8     | 0.153   | 7.9±8.8     | 5.6±2.7    | 0.679 |
| Triacylglycerole | TG(18:3_36:4) | 1.2±0.4   | 2±0.6       | 0.061   | 4.3±4.8     | 2.9±1.3    | 0.62  |
| Triacylglycerole | TG(18:3_38:5) | 0.5±0.2   | 0.6±0.2     | 0.374   | 1±0.9       | 1±0.4      | 0.943 |
| Triacylglycerole | TG(18:3_38:6) | 0.5±0.2   | 0.5±0.2     | 0.714   | 1.4±1.3     | 1.2±0.6    | 0.874 |
| Triacylglycerole | TG(20:0_32:3) | 0.4±0.2   | 0.8±0.4     | 0.144   | 0.7±0.7     | 0.7±0.3    | 0.896 |
| Triacylglycerole | TG(20:0_32:4) | 0.4±0.2   | 0.6±0.3     | 0.244   | 1±1.2       | 0.6±0.3    | 0.622 |
| Triacylglycerole | TG(20:1_30:1) | 3.9±1.7   | 11±10.6     | 0.292   | 2.9±1.4     | 4.8±4.3    | 0.492 |
| Triacylglycerole | TG(20:1_32:1) | 2.9±1     | 7.1±6       | 0.262   | 2.7±1.8     | 3.1±2      | 0.802 |

|                  |               |          |          |                     |           |          |       |
|------------------|---------------|----------|----------|---------------------|-----------|----------|-------|
| Triacylglycerole | TG(20:1_32:2) | 2.1±0.8  | 5.6±5.1  | 0.278               | 2.9±2.3   | 3.2±1.8  | 0.834 |
| Triacylglycerole | TG(20:1_32:3) | 0.4±0.1  | 0.8±0.4  | 0.121               | 0.5±0.5   | 0.6±0.3  | 0.873 |
| Triacylglycerole | TG(20:1_34:0) | 0.6±0.2  | 1±0.6    | 0.238               | 0.7±0.5   | 0.8±0.3  | 0.655 |
| Triacylglycerole | TG(20:1_34:1) | 2.6±0.9  | 6.1±4.1  | 0.194               | 2.8±2.3   | 2.8±1.3  | 0.999 |
| Triacylglycerole | TG(20:1_34:2) | 2.7±1    | 6.7±5.2  | 0.229               | 3.5±3.4   | 3.3±1.5  | 0.947 |
| Triacylglycerole | TG(20:1_34:3) | 0.9±0.3  | 1.8±0.9  | 0.133               | 1±0.9     | 0.9±0.4  | 0.89  |
| Triacylglycerole | TG(20:2_32:0) | 0.8±0.2  | 1.5±0.4  | 0.031* <sup>§</sup> | 3.3±3.8   | 1.9±0.9  | 0.549 |
| Triacylglycerole | TG(20:2_32:1) | 1.3±0.4  | 2.7±1.5  | 0.17                | 3.2±3.6   | 2.6±1.1  | 0.789 |
| Triacylglycerole | TG(20:2_34:1) | 1.5±0.2  | 2.7±1.2  | 0.127               | 3.9±4.2   | 2.4±0.9  | 0.551 |
| Triacylglycerole | TG(20:2_34:2) | 1.5±0.4  | 2.5±1.2  | 0.21                | 4.7±5.8   | 2.6±1.1  | 0.565 |
| Triacylglycerole | TG(20:2_34:3) | 0.6±0.3  | 0.7±0.3  | 0.619               | 1.2±1.2   | 0.9±0.5  | 0.736 |
| Triacylglycerole | TG(20:2_34:4) | 0.1±0.1  | 0.1±0.1  | 0.148               | 0.3±0.3   | 0.2±0.2  | 0.822 |
| Triacylglycerole | TG(20:2_36:5) | 0.2±0.1  | 0.2±0.1  | 0.617               | 0.4±0.4   | 0.3±0.2  | 0.876 |
| Triacylglycerole | TG(20:3_32:0) | 2.7±0.9  | 3.4±0.6  | 0.336               | 6.6±6.7   | 4.7±2.2  | 0.65  |
| Triacylglycerole | TG(20:3_32:1) | 3.3±1    | 5.1±1.4  | 0.11                | 5.9±5.2   | 5.5±2.6  | 0.917 |
| Triacylglycerole | TG(20:3_32:2) | 2.6±0.8  | 3.7±0.9  | 0.14                | 5.6±5.4   | 5.9±3.4  | 0.932 |
| Triacylglycerole | TG(20:3_34:0) | 1.1±0.2  | 1.5±0.4  | 0.126               | 1.8±1.6   | 1.5±0.8  | 0.838 |
| Triacylglycerole | TG(20:3_34:1) | 3.7±0.8  | 5.6±1.4  | 0.073               | 7.1±6.6   | 5.4±2.4  | 0.693 |
| Triacylglycerole | TG(20:3_34:2) | 3.2±0.8  | 5.5±1.4  | 0.04* <sup>§</sup>  | 7.4±7.8   | 5.8±3    | 0.755 |
| Triacylglycerole | TG(20:3_34:3) | 1.1±0.5  | 1.6±0.5  | 0.144               | 1.9±1.8   | 1.5±0.8  | 0.692 |
| Triacylglycerole | TG(20:3_36:3) | 2.4±0.6  | 3.7±1    | 0.091               | 5.5±5.1   | 4.7±2.2  | 0.823 |
| Triacylglycerole | TG(20:3_36:4) | 1.6±0.4  | 1.6±0.4  | 0.802               | 3.7±4     | 3.3±2    | 0.875 |
| Triacylglycerole | TG(20:3_36:5) | 0.3±0.2  | 0.3±0.2  | 0.887               | 0.6±0.5   | 0.7±0.4  | 0.76  |
| Triacylglycerole | TG(20:4_30:0) | 14.9±4.8 | 19.3±4.7 | 0.294               | 24.9±17.6 | 26±11    | 0.93  |
| Triacylglycerole | TG(20:4_32:0) | 12.8±2.8 | 15.3±2.5 | 0.287               | 19.6±14.1 | 17.6±7.9 | 0.838 |
| Triacylglycerole | TG(20:4_32:1) | 8.9±2.2  | 12.9±2.9 | 0.107               | 10.6±6.8  | 11.6±4.5 | 0.835 |
| Triacylglycerole | TG(20:4_32:2) | 6.1±1.7  | 7.6±1.8  | 0.308               | 9.5±7     | 12.2±5.3 | 0.609 |
| Triacylglycerole | TG(20:4_33:2) | 0.3±0.1  | 0.3±0.1  | 0.913               | 0.6±0.4   | 0.4±0.2  | 0.445 |
| Triacylglycerole | TG(20:4_34:0) | 5.4±1.1  | 6.5±1.1  | 0.223               | 7.4±5     | 7.5±3.2  | 0.973 |
| Triacylglycerole | TG(20:4_34:1) | 14.2±1.8 | 18.8±1.7 | 0.016*              | 17.8±12.4 | 17.1±6.3 | 0.938 |
| Triacylglycerole | TG(20:4_34:2) | 12.6±1.9 | 16.8±2.4 | 0.048*              | 18.8±14.5 | 18.6±7.5 | 0.986 |
| Triacylglycerole | TG(20:4_34:3) | 2.9±0.7  | 3.8±1    | 0.244               | 3±2.1     | 3.4±1.5  | 0.818 |
| Triacylglycerole | TG(20:4_35:3) | 0.2±0.1  | 0.2±0.1  | 0.429               | 0.3±0.2   | 0.2±0.1  | 0.363 |
| Triacylglycerole | TG(20:4_36:2) | 8.8±1.6  | 11.4±2   | 0.118               | 13.4±10.3 | 13±4.9   | 0.957 |
| Triacylglycerole | TG(20:4_36:3) | 7.4±1.6  | 9.3±1.8  | 0.207               | 10.8±8    | 12.1±5.2 | 0.821 |
| Triacylglycerole | TG(20:4_36:4) | 6.5±0.9  | 7.5±1    | 0.219               | 8.4±5.2   | 10.2±4.4 | 0.673 |
| Triacylglycerole | TG(20:4_36:5) | 1.1±0.3  | 1.2±0.5  | 0.6                 | 1.2±0.7   | 1.8±0.8  | 0.313 |
| Triacylglycerole | TG(20:5_34:0) | 0.3±0.1  | 0.4±0.1  | 0.245               | 0.5±0.5   | 0.6±0.3  | 0.79  |
| Triacylglycerole | TG(20:5_34:1) | 1.4±0.4  | 1.5±0.2  | 0.624               | 2.5±1.9   | 2.4±1.1  | 0.932 |

|                  |               |          |          |       |           |           |       |
|------------------|---------------|----------|----------|-------|-----------|-----------|-------|
| Triacylglycerole | TG(20:5_34:2) | 1±0.3    | 1.1±0.4  | 0.55  | 2.4±2.3   | 2.4±1.4   | 0.98  |
| Triacylglycerole | TG(20:5_36:2) | 0.9±0.1  | 1±0.3    | 0.357 | 1.3±0.9   | 1.4±0.5   | 0.792 |
| Triacylglycerole | TG(20:5_36:3) | 0.7±0.3  | 0.7±0.1  | 0.68  | 1.4±1.2   | 1.4±0.8   | 0.962 |
| Triacylglycerole | TG(22:0_32:4) | 0.1±0.1  | 0.1±0.1  | 0.345 | 0.1±0.1   | 0.1±0.1   | 0.862 |
| Triacylglycerole | TG(22:2_32:4) | 0.2±0.1  | 0.3±0.2  | 0.299 | 0.4±0.4   | 0.5±0.2   | 0.935 |
| Triacylglycerole | TG(22:4_32:0) | 1.2±0.3  | 1.6±0.2  | 0.105 | 2.2±1.5   | 2.3±1.1   | 0.896 |
| Triacylglycerole | TG(22:4_32:2) | 0.6±0.2  | 0.7±0.2  | 0.767 | 1.1±0.8   | 1.4±0.7   | 0.578 |
| Triacylglycerole | TG(22:4_34:2) | 1.4±0.5  | 2±0.4    | 0.147 | 2.5±1.9   | 2.8±1.2   | 0.833 |
| Triacylglycerole | TG(22:5_32:0) | 3.1±0.9  | 3.3±0.4  | 0.769 | 6.2±5     | 5.7±2.4   | 0.878 |
| Triacylglycerole | TG(22:5_32:1) | 2.6±0.8  | 3.2±1    | 0.41  | 5.3±4.3   | 5.1±2     | 0.928 |
| Triacylglycerole | TG(22:5_34:1) | 3.1±0.5  | 4±0.5    | 0.062 | 7.7±6.7   | 6±2.1     | 0.698 |
| Triacylglycerole | TG(22:5_34:2) | 2.8±0.7  | 3.6±0.6  | 0.178 | 8.6±8.4   | 6.4±3.1   | 0.685 |
| Triacylglycerole | TG(22:5_34:3) | 0.9±0.3  | 1±0.4    | 0.671 | 1.9±1.6   | 1.9±0.8   | 0.987 |
| Triacylglycerole | TG(22:6_32:0) | 16.6±5.5 | 15.9±5.1 | 0.876 | 51.6±49.3 | 43.2±20.7 | 0.793 |
| Triacylglycerole | TG(22:6_32:1) | 12.1±3.9 | 12.6±7.2 | 0.926 | 34.4±32.8 | 28.6±13.7 | 0.787 |
| Triacylglycerole | TG(22:6_34:1) | 14.7±3.8 | 14.3±5.5 | 0.935 | 51.7±51.9 | 37.3±17.6 | 0.666 |
| Triacylglycerole | TG(22:6_34:2) | 12.7±3.5 | 11.8±4.9 | 0.809 | 50.5±52.3 | 39.8±21.3 | 0.756 |
| Triacylglycerole | TG(22:6_34:3) | 3±1.1    | 3±2.1    | 0.993 | 8.8±8.2   | 7.9±4.5   | 0.873 |

Statistical analyses were performed with student's *t*-Test. n=4-6 per group, all data are mean ± SD. Concentrations were for amino acids presented as nmol/mg tissue, all other metabolites are presented in pmol/mg tissue. Significance <0.05 are marked with \*, FC >1.5 are marked with § (if significant <0.05). B.d.l. = below detection limit, n.a.= not assessed.
