# Supplementary material for: Carnosinase-1 Knock-Out Reduces Kidney Fibrosis in Type-1 Diabetic Mice on High Fat Diet
Source: MDPI journal article supplement (doi:10.3390/antiox12061270), 2023-06-14
Supplement: s1 [file s1]

Suppl. Table 10: Kidney arteriolar lumen/vessel ratio

| 10.1 Normal diet                      |           |                  |                  |           |                  |                      |                      |
|---------------------------------------|-----------|------------------|------------------|-----------|------------------|----------------------|----------------------|
|                                       | WT        | <i>Cndp1</i> -KO | <i>p</i> (vs WT) | WT STZ    | <i>p</i> (vs WT) | <i>Cndp1</i> -KO STZ | <i>p</i> (vs WT STZ) |
| <b>Lumen/vessel ratio</b>             | 0.62±0.03 | 0.6±0.05         | 0.764            | 0.58±0.07 | 0.156            | 0.56±0.06            | 0.726                |
| <b>Media thickness (% of vessel)</b>  | 14.1±1.40 | 14.2±1.80        | 0.990            | 16.1±2.90 | 0.132            | 15.9±1.90            | 0.987                |
| <b>Intima thickness (% of vessel)</b> | 5.74±1.26 | 7.3±1.28         | 0.132            | 6.48±2.00 | 0.702            | 8.05±1.56            | 0.069                |

  

| 10.2 High fat diet                    |           |                      |                      |            |                      |                          |                          |
|---------------------------------------|-----------|----------------------|----------------------|------------|----------------------|--------------------------|--------------------------|
|                                       | WT HFD    | <i>Cndp1</i> -KO HFD | <i>p</i> (vs WT HFD) | WT HFD STZ | <i>p</i> (vs WT HFD) | <i>Cndp1</i> -KO HFD STZ | <i>p</i> (vs WT HFD STZ) |
| <b>Lumen/vessel ratio</b>             | 0.63±0.07 | 0.61±0.04            | 0.889                | 0.58±0.05  | 0.112                | 0.61±0.06                | 0.401                    |
| <b>Media thickness (% of vessel)</b>  | 13.4±2.30 | 14.4±1.20            | 0.430                | 15.7±1.7   | 0.004                | 14.6±1.60                | 0.192                    |
| <b>Intima thickness (% of vessel)</b> | 6.37±1.64 | 5.47±2.28            | 0.620                | 6.84±1.14  | 0.926                | 6.72±2.26                | 0.990                    |

Statistical analyses were performed with one-way ANOVA. n=10-20 per group. Data are mean ± SD.

Suppl. Table 11: Kidney advanced glycation end-product (AGE) and 4-hydroxynonal (HNE) abundance

| 10.1 Normal diet |         |                  |                     |          |                     |                      |                         |
|------------------|---------|------------------|---------------------|----------|---------------------|----------------------|-------------------------|
|                  | WT      | <i>Cndp1</i> -KO | <i>p</i><br>(vs WT) | WT STZ   | <i>p</i><br>(vs WT) | <i>Cndp1</i> -KO STZ | <i>p</i><br>(vs WT STZ) |
| <b>AGEs</b>      | 1.1±0.1 | 1.0±0.6          | 0.971               | 1.8±0.5  | 0.032               | 1±0.6                | 0.009                   |
| <b>HNE</b>       | 3.6±2.9 | 10.3±4.2         | 0.15                | 15.7±7.4 | 0.005               | 3.3±1.6              | 0.006                   |

| 10.2 High fat diet |         |                      |                         |            |                         |                          |                             |
|--------------------|---------|----------------------|-------------------------|------------|-------------------------|--------------------------|-----------------------------|
|                    | WT HFD  | <i>Cndp1</i> -KO HFD | <i>p</i><br>(vs WT HFD) | WT HFD STZ | <i>p</i><br>(vs WT HFD) | <i>Cndp1</i> -KO HFD STZ | <i>p</i><br>(vs WT HFD STZ) |
| <b>AGEs</b>        | 1.0±0.5 | 2.8±2.1              | 0.011                   | 1.6±0.3    | 0.716                   | 1.6±0.6                  | 0.998                       |
| <b>HNE</b>         | 2.0±1.1 | 2.5±1.5              | 0.969                   | 3.5±2.4    | 0.416                   | 0.1±0.1                  | 0.023                       |

Statistical analyses were performed with one-way ANOVA. n=4-10 per group. Data are mean ± SD µg/mg protein. AGEs were determined densitometrical in tubular structure and normalized to WT for normal diet or WT HFD for high fat diet respectively. HNE was determined via ELISA in tissue lysate.

Suppl. Table 12: Kidney gene expression levels

## 12.1 Normal diet

| Gen                   | WT        | <i>Cndp1</i> -KO | <i>p</i><br>(vs WT) | WT STZ    | <i>p</i><br>(vs WT) | <i>Cndp1</i> -KO STZ | <i>p</i><br>(vs WT STZ) |
|-----------------------|-----------|------------------|---------------------|-----------|---------------------|----------------------|-------------------------|
| <i>eNOS</i>           | 1.03±0.24 | 0.94±0.18        | 0.921               | 1.2±0.31  | 0.639               | 1.00±0.27            | 0.513                   |
| <i>FAS</i>            | 1.01±0.11 | 1.01±0.22        | 0.999               | 0.89±0.10 | 0.813               | 0.99±0.39            | 0.878                   |
| <i>Fibronectin-1</i>  | 1.03±0.27 | 0.94±0.27        | 0.930               | 1.22±0.24 | 0.685               | 1.22±0.32            | 0.999                   |
| <i>Glu-Cys-ligase</i> | 1.02±0.22 | 1.02±0.41        | 0.999               | 0.95±0.22 | 0.815               | 1.26±1.11            | 0.815                   |
| <i>Ho-1</i>           | 1.04±0.31 | 1.44±0.52        | 0.366               | 1.37±0.43 | 0.530               | 1.55±0.29            | 0.868                   |
| <i>Hsf1</i>           | 1.03±0.27 | 1.04±0.15        | 0.999               | 1.73±0.35 | 0.132               | 1.87±0.70            | 0.967                   |
| <i>Hsp70 α1</i>       | 1.30±1.18 | 1.09±0.74        | 0.972               | 0.81±0.43 | 0.717               | 1.19±0.63            | 0.864                   |
| <i>Hspa1a</i>         | 1.01±0.17 | 0.71±0.26        | 0.348               | 0.84±0.33 | 0.759               | 0.78±0.23            | 0.986                   |
| <i>Hspa1b</i>         | 1.04±0.32 | 0.57±0.16        | 0.078               | 0.61±0.24 | 0.112               | 0.72±0.25            | 0.912                   |
| <i>HspA8</i>          | 1.01±0.11 | 1.18±0.15        | 0.908               | 2.09±0.36 | 0.006               | 1.91±0.61            | 0.893                   |
| <i>iNOS</i>           | 1.06±0.34 | 1.02±0.42        | 0.998               | 1.13±0.31 | 0.977               | 0.67±0.20            | 0.097                   |
| <i>Nfe2l2</i>         | 1.03±0.25 | 0.95±0.12        | 0.940               | 0.95±0.30 | 0.940               | 0.86±0.29            | 0.937                   |
| <i>NfκB</i>           | 1.02±0.21 | 1.10±0.22        | 0.935               | 1.19±0.18 | 0.582               | 1.12±0.27            | 0.956                   |
| <i>p53</i>            | 1.01±0.11 | 1.00±0.11        | 0.999               | 0.96±0.18 | 0.951               | 0.76±0.26            | 0.222                   |
| <i>Ptgs2</i>          | 1.59±1.74 | 0.79±0.63        | 0.635               | 0.88±0.47 | 0.681               | 1.15±1.01            | 0.978                   |
| <i>Renin</i>          | 1.06±0.42 | 1.89±1.09        | 0.194               | 1.27±0.65 | 0.951               | 0.93±0.37            | 0.826                   |
| <i>Sirtuin-1</i>      | 1.01±0.15 | 1.14±0.08        | 0.717               | 0.91±0.35 | 0.823               | 0.90±0.21            | 0.999                   |
| <i>Tnf-α</i>          | 1.09±0.53 | 0.77±0.44        | 0.897               | 1.39±1.20 | 0.913               | 1.47±0.81            | 0.999                   |
| <i>Tgf-β</i>          | 1.03±0.24 | 1.06±0.15        | 0.997               | 1.47±0.33 | 0.057               | 1.23±0.36            | 0.458                   |
| <i>Vegf</i>           | 1.02±0.21 | 0.96±0.24        | 0.958               | 0.92±0.24 | 0.853               | 0.74±0.20            | 0.578                   |
| <i>VegfR</i>          | 1.02±0.18 | 1.18±0.16        | 0.700               | 1.04±0.27 | 0.998               | 1.08±0.39            | 0.993                   |
| <i>Wisp1</i>          | 1.04±0.30 | 1.44±0.64        | 0.290               | 1.42±0.11 | 0.615               | 1.38±0.19            | 0.999                   |

## 12.2 High fat diet

| Gen                   | WT HFD    | <i>Cndp1</i> -KO HFD | <i>p</i><br>(vs WT HFD) | WT HFD STZ | <i>p</i><br>(vs WT HFD) | <i>Cndp1</i> -KO HFD STZ | <i>p</i><br>(vs WT HFD + STZ) |
|-----------------------|-----------|----------------------|-------------------------|------------|-------------------------|--------------------------|-------------------------------|
| <i>eNOS</i>           | 1.01±0.15 | 1.10±0.17            | 0.831                   | 1.11±0.13  | 0.809                   | 1.07±0.24                | 0.987                         |
| <i>FAS</i>            | 1.03±0.27 | 1.19±0.22            | 0.906                   | 1.41±0.60  | 0.367                   | 1.17±0.37                | 0.720                         |
| <i>Fibronectin-1</i>  | 1.03±0.25 | 1.01±0.21            | 0.999                   | 1.34±0.85  | 0.685                   | 1.28±0.34                | 0.997                         |
| <i>Glu-Cys-ligase</i> | 1.02±0.20 | 0.98±0.24            | 0.999                   | 1.15±0.73  | 0.953                   | 0.90±0.28                | 0.735                         |
| <i>Ho-1</i>           | 1.06±0.44 | 1.19±0.32            | 0.954                   | 1.52±0.66  | 0.301                   | 1.14±0.12                | 0.483                         |
| <i>Hsp70 α1</i>       | 1.05±0.37 | 1.15±0.78            | 0.999                   | 2.35±2.12  | 0.235                   | 1.14±0.16                | 0.288                         |
| <i>iNOS</i>           | 1.01±0.13 | 1.08±0.43            | 0.987                   | 1.24±0.44  | 0.676                   | 1.10±0.32                | 0.900                         |
| <i>Nfe2l2</i>         | 1.01±0.15 | 0.98±0.17            | 0.981                   | 1.16±0.12  | 0.364                   | 0.82±0.18                | 0.005                         |
| <i>NfκB</i>           | 1.02±0.18 | 0.82±0.09            | 0.117                   | 0.94±0.14  | 0.812                   | 0.82±0.18                | 0.526                         |
| <i>p53</i>            | 1.02±0.16 | 1.06±0.20            | 0.981                   | 1.20±0.25  | 0.321                   | 0.98±0.14                | 0.182                         |
| <i>Ptgs2</i>          | 1.35±1.33 | 1.18±0.78            | 0.994                   | 1.85±1.51  | 0.875                   | 2.07±0.64                | 0.988                         |
| <i>Renin</i>          | 1.11±0.62 | 1.10±0.60            | 0.999                   | 0.52±0.14  | 0.118                   | 0.40±0.10                | 0.958                         |
| <i>Sirtuin-1</i>      | 1.02±0.23 | 1.05±0.16            | 0.995                   | 0.68±0.22  | 0.028                   | 0.66±0.17                | 0.999                         |
| <i>Tnf-α</i>          | 1.01±0.16 | 1.41±0.45            | 0.581                   | 2.41±0.21  | 0.002                   | 2.36±0.91                | 0.999                         |
| <i>Tgf-β</i>          | 1.01±0.15 | 1.03±0.11            | 0.990                   | 1.59±0.37  | 0.002                   | 1.29±0.21                | 0.134                         |
| <i>Vegf</i>           | 1.01±0.14 | 0.92±0.18            | 0.606                   | 0.61±0.08  | 0.999                   | 0.61±0.10                | 0.999                         |
| <i>VegfR</i>          | 1.01±0.15 | 1.28±0.36            | 0.370                   | 0.84±0.26  | 0.710                   | 1.02±0.32                | 0.692                         |
| <i>Wisp1</i>          | 1.02±0.17 | 1.18±0.24            | 0.807                   | 1.26±0.45  | 0.382                   | 1.41±0.40                | 0.868                         |

Statistical analyses were performed with one-way ANOVA. N=5-6 per group. Data are mean ± SD. Data are 2<sup>-ΔΔCT</sup>.

Suppl. Table 13: Urine albumin to creatinine ratios

| 13.1 Normal diet |                  |                 |           |                  |                      |                      |
|------------------|------------------|-----------------|-----------|------------------|----------------------|----------------------|
| WT               | <i>Cndp1</i> -KO | <i>p</i> (vs W) | WT STZ    | <i>p</i> (vs WT) | <i>Cndp1</i> -KO STZ | <i>p</i> (vs WT STZ) |
| 16.3±7.5         | 18.9±9.5         | 0.60            | 63.7±26.7 | 0.002            | 91.7±67.1            | 0.46                 |

| 13.2 High fat diet |                      |                      |            |                      |                          |                            |
|--------------------|----------------------|----------------------|------------|----------------------|--------------------------|----------------------------|
| WT HFD             | <i>Cndp1</i> -KO HFD | <i>p</i> (vs WT HFD) | WT HFD STZ | <i>p</i> (vs WT HFD) | <i>Cndp1</i> -KO HFD STZ | <i>p</i> (vs WT HFD + STZ) |
| 14.5±5.3           | 33.8±40.4            | 0.31                 | 39.4±27.7  | 0.06                 | 29.8±20.3                | 0.3                        |

Urinary albumin to creatinine ratio (mg/g) at week 32.
