# Supplementary material for: Carnosinase-1 Knock-Out Reduces Kidney Fibrosis in Type-1 Diabetic Mice on High Fat Diet
Source: MDPI journal article supplement (doi:10.3390/antiox12061270), 2023-06-14
Supplement: s1 [file s1]

Suppl. Table 1: Insulin injection scale

| Blood sugar (mg/dl) | Insulin injection in units |
|---------------------|----------------------------|
| 200 - 349           | 0                          |
| 350 - 400           | 1                          |
| 401 - 460           | 2                          |
| 461 - 510           | 3                          |
| 511 - 600           | 4                          |
| ≥ 600               | 5                          |

Suppl. Table 2: Aperio ImageScope settings

|                            | AGE                     | phospho-Smad2/3         | Sirius red              | TSP-1                   | phospho-NRF2            |
|----------------------------|-------------------------|-------------------------|-------------------------|-------------------------|-------------------------|
| view width                 | 1000                    | 1000                    | 1000                    | 1000                    | 1000                    |
| view height                | 1000                    | 1000                    | 1000                    | 1000                    | 1000                    |
| overlap size               | 0                       | 0                       | 0                       | 0                       | 0                       |
| image zoom                 | 1                       | 1                       | 1                       | 1                       | 1                       |
| markup compression type    | same as processed image |
| compression quality        | 30                      | 30                      | 30                      | 30                      | 30                      |
| classifier neighbourhood   | 0                       | 0                       | 0                       | 0                       | 0                       |
| classifier                 | none                    | none                    | none                    | none                    | none                    |
| hue value                  | 0.1                     | 0.1                     | 0                       | 0.1                     | 0.1                     |
| hue width                  | 0.6                     | 0.6                     | 0.15                    | 0.1                     | 0.04                    |
| color saturation threshold | 0.03                    | 0.03                    | 0.03                    | 0.1                     | 0.1                     |
| lwp (high)                 | 220                     | 220                     | 220                     | 220                     | 220                     |
| lwp (low) = lsp ( high)    | 190                     | 190                     | 175                     | 190                     | 190                     |
| lp (low) = lsp (high)      | 120                     | 120                     | 100                     | 120                     | 120                     |
| lsp (low)                  | 0                       | 0                       | 0                       | 0                       | 0                       |
| lnp (high)                 | -1                      | -1                      | -1                      | -1                      | -2                      |

Lwp (high) = upper limit of total intensity of weak positive pixels, Lwp (low) = lower limit of total intensity of weak positive positive, lsp (high) = higher limit of total intensity of strong positive pixels, lsp (low) = lower limit of total intensity of strong positive pixels, lp (low) = lower limit of total intensity of positive pixels, lnp (high) = higher limit of of total intensity of negative pixels

Suppl. Table 3: Oligonucleotides for qRT-PCR evaluations

| Oligonucleotides:     |              |                           |
|-----------------------|--------------|---------------------------|
| Gene:                 | Orientation: | sequence from 5' - 3'     |
| <i>eNOS</i>           | forward      | GGTCCCTCATGCCAATCTCT      |
|                       | reverse      | AGAACTCTTCACTCTGCCCC      |
| <i>FAS</i>            | forward      | GAGGCCCATTTTGCTGTCAA      |
|                       | reverse      | CAGGGTGACGTTTGTTTCCA      |
| <i>Fibronectin-1</i>  | forward      | TCCCGGGCAGAAAGTACATT      |
|                       | reverse      | TTCAGGGAGGTTGAGCTCTG      |
| <i>Glu-Cys-ligase</i> | forward      | GGGGTGACGAGGTGGAGTA       |
|                       | reverse      | GTTGGGGTTTGTCTCTCCC       |
| <i>Ho-1</i>           | forward      | TTCAGAAGGGTCAGGTGTCC      |
|                       | reverse      | CAGTGAGGCCCATACCAGAA      |
| <i>Hsf1</i>           | forward      | CTACGCCCAGTCAGACGTTT      |
|                       | reverse      | GGCTGGAGATGGAGCTGAGTA     |
| <i>Hspa1</i>          | forward      | GAGATCGACTCTCTGTTGAGG     |
|                       | reverse      | GCCCGTTGAAGAAGTCCTG       |
| <i>Hspa1a</i>         | forward      | TGGTGACAGTCCGACATGAAG     |
|                       | reverse      | GCTGAGAGTCGTTGAAGTAGGC    |
| <i>Hspa1b</i>         | forward      | GAGATCGACTCTCTGTTGAGG     |
|                       | reverse      | GCCCGTTGAAGAAGTCCTG       |
| <i>HspA8</i>          | forward      | TCTCGGCACCACCTACTCC       |
|                       | reverse      | CTACGCCCAGTCAGACGTTT      |
| <i>iNOS</i>           | forward      | AATCTTGGAGCGAGTTGTGG      |
|                       | reverse      | CAGGAAGTAGGTGAGGGCTTG     |
| <i>Nfe2l2</i>         | forward      | CGAGATATACGCAGGAGAGGTAAGA |
|                       | reverse      | GCTCGACAATGTTCTCCAGCTT    |
| <i>NfκB</i>           | forward      | GAAATTCCTGATCCAGACAAAAG   |
|                       | reverse      | ATCACTTCAATGGCCTCTGTGTAG  |
| <i>p53</i>            | forward      | CCCCTGTCATCTTTGTCCCT      |
|                       | reverse      | AGCTGGCAGAAAGCTTATTGAG    |
| <i>Ptgs2</i>          | forward      | TTCGTCGTCTCGTTGCAAAG      |
|                       | reverse      | CCCAGGTCCTCGCTTATGAT      |
| <i>Renin</i>          | forward      | AGAACACCGTCAAACCTGGC      |
|                       | reverse      | CCTCTACCTTGCTTGTGGGA      |
| <i>Sirtuin-1</i>      | forward      | AACATCGCAGTCTCCAAGGA      |
|                       | reverse      | TGCCATCATGAAGCCAGAGA      |
| <i>Tfn-α</i>          | forward      | AATGGCCTCCCTCTCATCAGTT    |
|                       | reverse      | CCACTTGGTGGTTTGCTACGA     |
| <i>Tgf-β</i>          | forward      | CAACAATTCCTGGCGTTACCTGG   |
|                       | reverse      | GAAAGCCCTGTATTCCGTCTCCTT  |
| <i>Vegf</i>           | forward      | CGCTCCAGGATTAAACCGG       |
|                       | reverse      | GCTGTAACGATGAAGCCCTG      |
| <i>VegfR</i>          | forward      | TGAATGTCCCACCCAGATC       |
|                       | reverse      | CCTCCACGTGTCTCCATTCT      |
| <i>Wisp1</i>          | forward      | CAGCACCCTAGAGGAAACGA      |
|                       | reverse      | CTGGGCACATATCTTACAGCATT   |

Suppl. Table 4: Body weight

## 4.1 Normal diet

| weeks of experiment | WT       | <i>Cndp1</i> -KO | <i>p</i><br>(vs WT) | WT STZ   | <i>p</i><br>(vs WT) | <i>Cndp1</i> -KO STZ | <i>p</i><br>(vs WT STZ) |
|---------------------|----------|------------------|---------------------|----------|---------------------|----------------------|-------------------------|
| <b>0</b>            | 19.6±1.0 | 19.6±1.8         | 0.999               | 19.0±1.1 | 0.289               | 19.0±1.4             | 0.999                   |
| <b>12</b>           | 23.2±1.3 | 24.6±2.3         | 0.339               | 19.8±1.8 | <0.001              | 18.8±2.8             | 0.424                   |
| <b>16</b>           | 22.8±1.4 | 25.8±3.1         | 0.057               | 18.9±2.4 | <0.001              | 19.7±2.6             | 0.674                   |
| <b>20</b>           | 24.1±1.7 | 27.1±3.5         | 0.115               | 19.3±2.2 | <0.001              | 19.8±2.8             | 0.868                   |
| <b>24</b>           | 24.2±1.9 | 27.0±3.3         | 0.134               | 19.6±2.3 | <0.001              | 19.7±2.8             | 0.999                   |
| <b>28</b>           | 24.7±1.2 | 27.9±3.9         | 0.110               | 19.6±2.5 | <0.001              | 20.3±2.6             | 0.819                   |
| <b>30</b>           | 24.3±1.8 | 28.5±4.1         | 0.044               | 19.9±2.3 | 0.001               | 20.2±2.7             | 0.989                   |
| <b>32</b>           | 23.9±1.6 | 27.8±4.4         | 0.086               | 19.5±2.1 | <0.001              | 19.9±3.1             | 0.950                   |
| <b>average</b>      | 23.3±1.5 | 26.0±2.7         | 0.017               | 19.4±0.3 | 0.001               | 19.6±0.5             | 0.993                   |

## 4.2 High fat diet

| weeks of experiment | WT HFD   | <i>Cndp1</i> -KO HFD | <i>p</i><br>(vs WT HFD) | <i>p</i><br>(vs WT ND) | <i>p</i> (vs <i>Cndp1</i> -KO ND) | WT HFD + STZ | <i>p</i><br>(vs WT HFD) | <i>Cndp1</i> -KO HFD + STZ | <i>p</i><br>(vs WT HFD STZ) |
|---------------------|----------|----------------------|-------------------------|------------------------|-----------------------------------|--------------|-------------------------|----------------------------|-----------------------------|
| <b>0</b>            | 19.8±1.7 | 19.1±1.5             | 0.667                   | 0.986                  | 0.9915                            | 18.7±1.4     | 0.240                   | 19.8±2.0                   | 0.118                       |
| <b>12</b>           | 32.6±5.0 | 35.2±6.1             | 0.616                   | 0.116                  | <0.001                            | 19.4±1.9     | <0.001                  | 21.2±1.8                   | 0.010                       |
| <b>16</b>           | 36.1±5.3 | 39.8±6.2             | 0.357                   | 0.010                  | <0.001                            | 20.8±2.0     | <0.001                  | 22.0±2.7                   | 0.304                       |
| <b>20</b>           | 39.5±4.6 | 42.5±6.4             | 0.465                   | 0.002                  | <0.001                            | 20.7±1.7     | <0.001                  | 21.9±2.7                   | 0.280                       |
| <b>24</b>           | 41.6±4.8 | 45.5±7.5             | 0.320                   | 0.001                  | <0.001                            | 20.9±1.7     | <0.001                  | 22.3±1.9                   | 0.055                       |
| <b>28</b>           | 45.5±5.3 | 49.2±7.4             | 0.406                   | <0.001                 | <0.001                            | 21.3±1.7     | <0.001                  | 22.4±2.6                   | 0.479                       |
| <b>30</b>           | 43.5±5.4 | 49.5±7.4             | 0.082                   | <0.001                 | <0.001                            | 21.5±1.9     | <0.001                  | 23.4±2.3                   | 0.059                       |
| <b>32</b>           | 42.8±4.8 | 48.6±7.9             | 0.083                   | <0.001                 | <0.001                            | 21.7±2.7     | <0.001                  | 23.0±2.2                   | 0.337                       |
| <b>average</b>      | 37.7±7.1 | 41.1±9.6             | 0.723                   | <0.001                 | <0.001                            | 20.6±0.9     | 0.001                   | 22.0±1.0                   | 0.975                       |

Statistical analyses were performed with mixed effect models. n=10-29 per group. Data are mean ± SD gram body weight.

Suppl. Table 5: Energy intake

5.1 Normal diet

| weeks of experiment | WT       | <i>Cndp1</i> -KO | <i>p</i><br>(vs WT) | WT STZ    | <i>p</i><br>(vs WT) | <i>Cndp1</i> -KO STZ | <i>p</i><br>(vs WT STZ) |
|---------------------|----------|------------------|---------------------|-----------|---------------------|----------------------|-------------------------|
| <b>12</b>           | 36.4±3.1 | 41.1±8.7         | 0.616               | 53.6±15.9 | 0.008               | 53.6±16.4            | 1.000                   |
| <b>16</b>           | 37.4±3.8 | 35.9±8.1         | 0.975               | 54.9±9.6  | 0.001               | 54.1±13.3            | 0.998                   |
| <b>20</b>           | 33.5±6.1 | 39.6±5.6         | 0.364               | 50.7±8.8  | 0.004               | 58.5±15.3            | 0.351                   |
| <b>24</b>           | 35.7±3.4 | 45.2±5.7         | 0.035               | 46.8±11.0 | 0.039               | 57.5±8.9             | 0.080                   |
| <b>28</b>           | 37.2±5.9 | 43.0±7.2         | 0.492               | 49.4±11.4 | 0.072               | 52.1±9.7             | 0.933                   |
| <b>Average</b>      | 36.0±4.4 | 40.9±7.0         | 0.323               | 51.0±11.3 | <0.001              | 55.1±12.7            | 0.133                   |

5.2 High fat diet

| weeks of experiment | WT HFD    | <i>Cndp1</i> -KO HFD | <i>p</i><br>(vs WT HFD) | WT HFD STZ | <i>p</i><br>(vs WT HFD) | <i>Cndp1</i> -KO HFD<br>STZ | <i>p</i><br>(vs WT HFD STZ) |
|---------------------|-----------|----------------------|-------------------------|------------|-------------------------|-----------------------------|-----------------------------|
| <b>12</b>           | 30.9±5.4  | 40.7±9.6             | 0.17                    | 60.2±12.9  | 0.001                   | 60.7±17.2                   | 0.999                       |
| <b>16</b>           | 56.8±6.4  | 48.6±9.4             | 0.341                   | 52.7±7.6   | 0.712                   | 54.2±8.5                    | 0.998                       |
| <b>20</b>           | 33.7±12.2 | 47±16.9              | 0.451                   | 56.5±10.3  | 0.078                   | 62.7±12.7                   | 0.351                       |
| <b>24</b>           | 37.2±6.8  | 40.2±7.4             | 0.890                   | 54.7±7.6   | 0.020                   | 59.1±14.0                   | 0.080                       |
| <b>28</b>           | 37.1±14.0 | 49.4±9.3             | 0.468                   | 57.1±9.2   | 0.172                   | 65.1±8.2                    | 0.933                       |
| <b>average</b>      | 39.6±7.6  | 44.1±10.8            | 0.543                   | 56.0±9.6   | <0.001                  | 59.1±13.0                   | 0.501                       |

Statistical analyses were performed with mixed effect model, n=6-16 per group. Data are mean ± SD in kJ/mouse/24h.

Suppl. Table 6: Liquid intake

6.1 Normal diet

| weeks of experiment | WT      | <i>Cndp1</i> -KO | <i>p</i><br>(vs WT) | WT STZ   | <i>p</i><br>(vs WT) | <i>Cndp1</i> -KO STZ | <i>p</i><br>(vs WT STZ) |
|---------------------|---------|------------------|---------------------|----------|---------------------|----------------------|-------------------------|
| <b>12</b>           | 4.2±0.2 | 4.9±1.2          | 0.492               | 17.8±4.5 | <0.001              | 18.6±6.7             | 0.976                   |
| <b>16</b>           | 4.3±0.5 | 4.5±0.8          | 0.936               | 19.2±4.0 | <0.001              | 19.0±5.7             | 0.999                   |
| <b>20</b>           | 4.1±0.5 | 4.6±0.7          | 0.354               | 17.4±4.3 | <0.001              | 21.3±6.3             | 0.249                   |
| <b>24</b>           | 4.5±0.3 | 4.9±0.7          | 0.429               | 14.8±3.7 | <0.001              | 17.7±3.7             | 0.294                   |
| <b>28</b>           | 4.3±0.2 | 4.5±0.8          | 0.921               | 16.5±4.9 | 0.001               | 19.1±5.2             | 0.653                   |
| <b>average</b>      | 4.2±0.3 | 4.6±0.8          | 0.983               | 17.1±4.2 | <0.001              | 19.1±5.5             | 0.041                   |

6.2 High fat diet

| weeks of experiment | WT HFD  | <i>Cndp1</i> -KO HFD | <i>p</i><br>(vs WT HFD) | WT HFD STZ | <i>p</i><br>(vs WT HFD) | <i>Cndp1</i> -KO HFD STZ | <i>p</i><br>(vs WT HFD STZ) |
|---------------------|---------|----------------------|-------------------------|------------|-------------------------|--------------------------|-----------------------------|
| <b>12</b>           | 2.8±0.6 | 3.4±0.8              | 0.476                   | 12.3±2.7   | <0.001                  | 12.3±4.1                 | 0.999                       |
| <b>16</b>           | 3.1±0.4 | 3.2±0.6              | 0.955                   | 11.9±3.1   | <0.001                  | 9.6±3.3                  | 0.281                       |
| <b>20</b>           | 2.4±1.0 | 3.0±0.8              | 0.713                   | 12.1±3.7   | <0.001                  | 12.3±2.0                 | 0.998                       |
| <b>24</b>           | 2.4±0.5 | 2.9±0.6              | 0.364                   | 12.3±3.5   | <0.001                  | 12.6±2.3                 | 0.992                       |
| <b>28</b>           | 2.4±0.5 | 3.1±0.7              | 0.190                   | 11.8±5.2   | 0.001                   | 13.1±3.4                 | 0.895                       |
| <b>average</b>      | 2.6±0.5 | 3.1±0.7              | 0.904                   | 12.0±3.6   | <0.001                  | 12.0±3.0                 | 0.998                       |

Statistical analyses were performed with mixed effect models. n=6-17 per group. Data are mean ± SD g water/mouse/24h.

Suppl. Table 7: Fasting blood glucose levels

7.1 Normal diet

| weeks of experiment | WT      | <i>Cndp1</i> -KO | <i>p</i><br>(vs WT) | WT STZ   | <i>p</i><br>(vs WT) | <i>Cndp1</i> -KO STZ | <i>p</i><br>(vs WT STZ) |
|---------------------|---------|------------------|---------------------|----------|---------------------|----------------------|-------------------------|
| 12                  | 6.5±1   | 7.5±1.3          | 0.205               | 21.5±5   | <0.001              | 20.2±5               | 0.792                   |
| 16                  | 6.3±0.5 | 7.4±1.2          | 0.073               | 21.6±4.8 | <0.001              | 21.2±4.5             | 0.991                   |
| 20                  | 6.6±1.1 | 7.5±1.4          | 0.369               | 20.4±4.5 | <0.001              | 22.9±4.5             | 0.206                   |
| 24                  | 7.2±1.0 | 6.6±2.2          | 0.878               | 21.3±5.9 | <0.001              | 21.3±3.0             | 1.000                   |
| 28                  | 6.5±0.8 | 7.0±1.5          | 0.772               | 20.4±4.8 | <0.001              | 19.6±4.2             | 0.935                   |
| 30                  | 7.5±1.4 | 6.9±0.9          | 0.599               | 19.4±4.9 | <0.001              | 19.2±6.5             | 1.000                   |
| 32                  | 6.5±0.8 | 7.3±0.8          | 0.132               | 19.3±4.5 | <0.001              | 20.6±3.1             | 0.751                   |
| average             | 6.7±0.4 | 7.1±0.4          | 0.745               | 20.5±1.0 | <0.001              | 20.7±1.2             | 0.982                   |

7.2 High fat diet

| weeks of experiment | WT HFD  | <i>Cndp1</i> -KO HFD | <i>p</i><br>(vs WT HFD) | WT HFD STZ | <i>p</i><br>(vs WT HFD) | <i>Cndp1</i> -KO HFD<br>STZ | <i>p</i><br>(vs WT HFD STZ) |
|---------------------|---------|----------------------|-------------------------|------------|-------------------------|-----------------------------|-----------------------------|
| 12                  | 8.0±1.5 | 7.7±0.9              | 0.879                   | 20.1±2.7   | <0.001                  | 19.8±3.0                    | 0.994                       |
| 16                  | 7.9±1.0 | 8.4±1.5              | 0.672                   | 21.5±3.1   | <0.001                  | 20.0±3.1                    | 0.356                       |
| 20                  | 8.2±1.0 | 9.4±1.6              | 0.064                   | 21.3±2.8   | <0.001                  | 20.7±2.6                    | 0.899                       |
| 24                  | 9.5±1.4 | 8.6±1.8              | 0.451                   | 21.9±3.9   | <0.001                  | 20.7±3.4                    | 0.729                       |
| 28                  | 8.8±1.5 | 8.1±1.4              | 0.684                   | 22.7±4.3   | <0.001                  | 21.0±3.6                    | 0.568                       |
| 30                  | 8.3±1.2 | 8.4±1.0              | 0.987                   | 21.4±4.1   | <0.001                  | 21.6±4.6                    | 0.999                       |
| 32                  | 8.7±1.2 | 8.8±1.1              | 0.972                   | 20.8±4.0   | <0.001                  | 20.2±3.6                    | 0.961                       |
| average             | 8.4±0.5 | 8.5±0.6              | 0.999                   | 21.3±0.8   | <0.001                  | 20.6±0.6                    | 0.125                       |

Statistical analyses were performed with mixed effect model. n=10-27 per group. Data are mean ± SD in Blood glucose levels in mmol/l.

Suppl. Table 8: Kidney protein expression of HSP70 protein family members, carnosine synthase 1, phospho-NRF2 and thrombospondin-1

| 8.1 Normal diet      |         |                  |                  |         |                  |                      |                      |
|----------------------|---------|------------------|------------------|---------|------------------|----------------------|----------------------|
| Protein              | WT      | <i>Cndp1</i> -KO | <i>p</i> (vs WT) | WT STZ  | <i>p</i> (vs WT) | <i>Cndp1</i> -KO STZ | <i>p</i> (vs WT STZ) |
| HSPA1A/A1B           | 1.0±0.6 | 0.9±0.6          | 0.999            | 1.1±0.6 | 0.999            | 1.9±2.0              | 0.774                |
| HSPA9                | 1.0±0.3 | 1.0±0.4          | 1.000            | 1.3±0.4 | 0.815            | 1.2±0.2              | 0.994                |
| HSP60                | 1.0±1.1 | 1.6±1.4          | 0.841            | 0.7±0.4 | 0.970            | 0.7±0.3              | 0.999                |
| HSF1                 | 1.0±0.4 | 1.1±0.1          | 1.000            | 2.0±1.6 | 0.493            | 1.6±0.5              | 0.966                |
| Carnosine Synthase 1 | 0.6±0.2 | 0.4±0.3          | 0.443            | 0.3±0.2 | 0.107            | 0.3±0.3              | 1.000                |
| Phospho-NRF2         | 0.4±0.1 | 0.3±0.2          | 0.403            | 0.3±0.1 | 0.911            | 0.3±0.1              | 0.403                |
| Thrombospondin-1     | 1.0±0.6 | 1.1±1.1          | 0.994            | 0.9±0.6 | 0.981            | 1.2±0.9              | 0.818                |

  

| 8.2. High fat diet   |         |                      |                         |            |                         |                             |                             |
|----------------------|---------|----------------------|-------------------------|------------|-------------------------|-----------------------------|-----------------------------|
| Protein              | WT HFD  | <i>Cndp1</i> -KO HFD | <i>p</i><br>(vs WT HFD) | WT HFD STZ | <i>p</i><br>(vs WT HFD) | <i>Cndp1</i> -KO HFD<br>STZ | <i>p</i><br>(vs WT HFD STZ) |
| Carnosine synthase 1 | 0.5±0.2 | 0.4±0.1              | 0.568                   | 0.3±0.3    | 0.130                   | 0.6±0.3                     | 0.021                       |
| Phospho-NRF2         | 0.3±0.1 | 0.2±0.1              | 0.828                   | 0.3±0.1    | 0.969                   | 0.3±0.2                     | 0.908                       |
| Thrombospondin-1     | 1.1±0.6 | 0.9±0.6              | 0.752                   | 1.2±0.7    | 0.999                   | 1.2±0.6                     | 0.999                       |

Statistical analyses were performed with one-way ANOVA. n=4 per group. Data are mean ± SD. For HSP-70 proteins, data were normalized to WT.
